# Supplementary material for: A novel enhancer activated by CEBPB drives colorectal carcinogenesis via enhancer RNA-mediated DNA loop promotion of KRT80 transcription
Source: Research Square preprint supplement (doi:10.21203/rs.3.rs-6046594/v1), 2025-05-13
Supplement: Supplementary file 1 [file abebc002e9124dbe4a69c541.xlsx]

## Sheet: DEGs identified in CRC
The diﬀerentially expressed genes identiﬁed in CRC tissues in TCGA datasets.
gene	logFC	AveExpr	t	P.Value	adj.P.Val	B
CST1	6.98063	4.95765	12.9651	2.0333e-19	1.5576e-17	33.8625
KRT80	6.78772	6.2338	29.0325	4.07559e-38	8.36719e-34	76.0147
MMP7	6.71798	5.48862	15.3663	5.86416e-23	1.38381e-20	41.9526
KLK6	6.63073	4.04621	12.431	1.37699e-18	8.2179e-17	31.9609
COL11A1	6.46615	5.55401	13.9526	6.51244e-21	7.95836e-19	37.2809
COL10A1	6.42503	4.59839	11.682	2.13981e-17	9.15213e-16	29.2324
KRT23	6.30261	5.98658	10.4367	2.37452e-15	5.78279e-14	24.5468
LOC100190940	6.28952	3.91828	11.63	2.5957e-17	1.07007e-15	29.0402
DPEP1	6.24204	7.63436	10.9646	3.15622e-16	9.65682e-15	26.5548
NOTUM	5.98454	4.43155	10.0176	1.20391e-14	2.48711e-13	22.9317
CDH3	5.9798	7.71395	21.502	1.14294e-30	2.93307e-27	59.4385
FOXQ1	5.77044	6.51132	17.1844	1.97153e-25	1.22653e-22	47.5867
KIAA1199	5.6209	8.66255	18.6496	2.64614e-27	2.71627e-24	51.8375
WNT2	5.41961	4.80391	17.0084	3.36414e-25	1.90134e-22	47.0589
GRIN2D	5.36923	6.77431	23.2827	1.33473e-32	8.2715e-29	63.7774
ESM1	5.34716	4.39347	20.1602	3.95519e-29	6.85533e-26	55.9682
ETV4	5.33615	8.2557	20.8952	5.5571e-30	1.14087e-26	57.8915
FABP6	5.32173	3.9516	11.3739	6.74769e-17	2.47681e-15	28.0898
COMP	5.26283	4.63769	8.25836	1.28503e-11	1.38414e-10	16
CPNE7	5.25208	5.51088	17.8754	2.5057e-26	2.07013e-23	49.6225
CLDN2	5.16159	7.1434	9.03038	5.86972e-13	8.28746e-12	19.0661
CA9	5.15597	5.56327	10.3193	3.73572e-15	8.73512e-14	24.0959
TCN1	5.10648	3.89864	8.00067	3.61942e-11	3.55025e-10	14.9722
REG1A	5.03384	7.03273	4.77082	1.13252e-05	3.79293e-05	2.5105
INHBA	4.882	5.19703	15.2536	8.45932e-23	1.88772e-20	41.5895
MMP3	4.84557	6.42624	8.91431	9.31574e-13	1.27162e-11	18.607
C6orf223	4.73627	6.60481	12.9061	2.50656e-19	1.86448e-17	33.6546
CLDN1	4.68854	8.43983	21.6266	8.29673e-31	2.43331e-27	59.7516
KLK8	4.62127	2.34994	9.19467	3.0575e-13	4.61888e-12	19.7145
STRA6	4.61874	4.2207	12.4423	1.32198e-18	7.98241e-17	32.0015
KRT6B	4.55712	4.15425	8.0806	2.62467e-11	2.65703e-10	15.2911
KLK7	4.46487	2.476	7.5967	1.83899e-10	1.53474e-09	13.3601
CXCL5	4.42415	5.52784	7.62016	1.67333e-10	1.41372e-09	13.4537
EPHX4	4.41796	4.91245	16.4697	1.76472e-24	7.87602e-22	45.4207
REG1B	4.39617	4.34975	4.63406	1.85803e-05	5.99112e-05	2.03013
PDX1	4.35146	5.9918	13.1172	1.18691e-19	9.70807e-18	34.3975
MMP1	4.27418	8.07284	9.53068	8.10498e-14	1.38778e-12	21.0348
GRHL3	4.16245	3.87902	14.1073	3.84146e-21	5.12112e-19	37.8049
TRIM29	4.1276	8.40791	13.0577	1.46449e-19	1.16535e-17	34.1887
SALL4	4.10283	3.55427	13.573	2.40887e-20	2.53611e-18	35.982
SLCO1B3	4.05515	3.33496	7.07023	1.52625e-09	1.04936e-08	11.2645
LEMD1	4.04641	2.19955	11.1202	1.75162e-16	5.71713e-15	27.1407
KLK10	4.02342	6.69365	7.55078	2.21229e-10	1.80683e-09	13.177
C2CD4A	3.99432	6.3018	11.1251	1.71939e-16	5.62984e-15	27.1591
VWA2	3.96634	6.57218	10.996	2.80205e-16	8.67441e-15	26.6732
DDN	3.96481	3.852	14.4134	1.36451e-21	2.09055e-19	38.8321
HTR1D	3.95959	4.75113	10.8829	4.30536e-16	1.26632e-14	26.2458
PLEKHN1	3.95073	4.29241	21.985	3.3257e-31	1.13794e-27	60.6444
OTX1	3.94992	2.63848	14.6233	6.75434e-22	1.11828e-19	39.5298
TACSTD2	3.93758	6.72283	8.04399	3.04077e-11	3.02163e-10	15.1451
C6orf15	3.92878	2.17618	6.79474	4.59952e-09	2.88507e-08	10.1738
PRSS22	3.92796	6.14899	11.3592	7.12907e-17	2.58586e-15	28.0351
ADAM12	3.92171	6.47863	9.91253	1.81339e-14	3.59699e-13	22.5242
GYLTL1B	3.87788	6.84356	11.7859	1.45641e-17	6.58593e-16	29.6151
IL11	3.87672	3.8135	10.311	3.85729e-15	8.98866e-14	24.0641
CNTD2	3.83687	3.66797	12.6406	6.47106e-19	4.25804e-17	32.7117
IL8	3.8267	8.28468	8.44255	6.13774e-12	7.09903e-11	16.7337
MMP11	3.82593	9.16512	11.4254	5.56334e-17	2.09186e-15	28.2818
SIM2	3.81789	5.93474	16.2277	3.75725e-24	1.50209e-21	44.6732
PKP1	3.81134	5.64832	11.0359	2.40948e-16	7.63373e-15	26.8234
STK31	3.80259	3.45933	10.9453	3.39658e-16	1.03001e-14	26.4817
COL7A1	3.79155	6.85346	12.2456	2.69833e-18	1.51357e-16	31.292
CST4	3.77238	2.0788	9.94398	1.60396e-14	3.21373e-13	22.6462
NKD1	3.76927	7.0258	8.00029	3.62501e-11	3.55403e-10	14.9707
ACAN	3.72442	5.66695	10.561	1.47266e-15	3.77922e-14	25.0222
KRT17	3.72029	4.85178	7.2514	7.3745e-10	5.40692e-09	11.9844
SLC4A11	3.67236	4.61402	12.0401	5.71484e-18	2.9405e-16	30.5456
SULT2B1	3.64522	6.75726	14.3414	1.73854e-21	2.60527e-19	38.5918
EGFL6	3.62355	3.93984	11.5131	4.01045e-17	1.55348e-15	28.6074
MSX2	3.62112	5.39883	10.5464	1.55762e-15	3.96748e-14	24.9663
ACSL6	3.61399	4.83062	7.52196	2.48434e-10	2.00644e-09	13.062
CHI3L1	3.60909	6.94678	7.28125	6.54083e-10	4.83381e-09	12.1031
GAD1	3.58414	2.7361	8.60386	3.21727e-12	3.92925e-11	17.3754
LY6G6D	3.5553	4.5085	4.87456	7.75025e-06	2.67596e-05	2.87918
NKD2	3.54363	6.02498	10.8447	4.97816e-16	1.4314e-14	26.1013
PIWIL1	3.54215	3.04108	5.92468	1.43584e-07	6.8078e-07	6.78164
KIAA1257	3.54107	4.87602	18.0641	1.43995e-26	1.34373e-23	50.1686
REG3A	3.52708	4.48576	4.19179	8.82206e-05	0.000251167	0.525864
TRIB3	3.52691	8.68081	21.1259	3.03411e-30	6.92114e-27	58.4838
TG	3.51867	4.35189	7.96021	4.25909e-11	4.09743e-10	14.8107
PRSS33	3.51469	3.66556	6.0948	7.37829e-08	3.70539e-07	7.43656
DKK4	3.48296	1.88135	6.68226	7.20628e-09	4.3526e-08	9.7302
MAPK15	3.47999	3.467	12.3883	1.60727e-18	9.37419e-17	31.8072
DSG3	3.4729	3.90641	6.29715	3.32513e-08	1.77635e-07	8.22155
KRT6A	3.4617	2.49208	6.05843	8.50991e-08	4.22171e-07	7.29613
TESC	3.44466	7.33338	10.5938	1.29868e-15	3.36217e-14	25.1472
C2orf70	3.44418	3.82368	11.3908	6.33266e-17	2.3341e-15	28.1529
FAP	3.41207	6.37468	8.07573	2.67649e-11	2.70548e-10	15.2717
ATG9B	3.40183	4.58402	11.1584	1.51669e-16	5.02556e-15	27.2839
CTHRC1	3.39927	7.3823	11.6109	2.78633e-17	1.1305e-15	28.9697
WT1	3.39687	2.64725	7.45695	3.227e-10	2.54086e-09	12.8029
C17orf96	3.3881	6.28882	17.5146	7.3091e-26	5.00186e-23	48.5663
SFTA2	3.37976	1.84875	9.309	1.94419e-13	3.04689e-12	20.1647
SLCO4A1	3.37422	8.57818	15.0293	1.7614e-22	3.46744e-20	40.8626
DHRS2	3.36796	3.61193	8.18309	1.7386e-11	1.81738e-10	15.6999
EPYC	3.35295	1.81387	7.52247	2.47922e-10	2.00309e-09	13.0641
CBX2	3.33093	6.415	14.6137	6.97559e-22	1.14113e-19	39.4978
SPTBN2	3.32647	7.82939	15.9242	9.79143e-24	3.3503e-21	43.7253
LRP8	3.3194	6.79759	14.3328	1.78993e-21	2.65452e-19	38.5629
CCDC78	3.3082	3.8163	12.9116	2.45802e-19	1.83502e-17	33.674
TFR2	3.30532	4.7636	11.9186	8.92657e-18	4.30293e-16	30.102
CEL	3.27777	5.70088	5.21893	2.15363e-06	8.1651e-06	4.12747
APLN	3.26694	5.95918	11.7208	1.85305e-17	8.04295e-16	29.3755
OLR1	3.25576	4.61619	8.80956	1.41441e-12	1.86379e-11	18.1919
DUSP27	3.2489	3.77431	4.27022	6.72735e-05	0.00019621	0.786748
CGREF1	3.23623	7.16497	9.79423	2.87969e-14	5.48424e-13	22.0641
FOSL1	3.22272	6.27975	7.74094	1.02917e-10	9.15065e-10	13.9356
MDFI	3.21821	6.18242	13.9777	5.97683e-21	7.43663e-19	37.3661
SPERT	3.2159	1.70059	11.8201	1.28335e-17	5.94742e-16	29.7409
TLX1	3.21042	3.244	10.8732	4.46627e-16	1.30803e-14	26.2093
FGF19	3.204	2.02613	5.94017	1.35161e-07	6.43521e-07	6.84107
POU5F1B	3.20286	4.92764	8.94424	8.26896e-13	1.14011e-11	18.7254
HULC	3.19469	1.80577	4.32186	5.62063e-05	0.00016663	0.959951
UCA1	3.19411	5.77273	6.63606	8.6633e-09	5.14634e-08	9.54836
S100A2	3.18713	4.68322	12.3154	2.09367e-18	1.19397e-16	31.5443
HAGHL	3.18048	5.16747	12.5205	9.97007e-19	6.2595e-17	32.282
UNC93A	3.1755	3.53024	7.07821	1.47818e-09	1.01904e-08	11.2962
SERPINB5	3.17251	7.94776	7.59675	1.83864e-10	1.53474e-09	13.3603
ULBP2	3.16856	3.03315	9.73894	3.57607e-14	6.66818e-13	21.8486
ADAMTS12	3.15189	5.66774	8.49422	4.98995e-12	5.87743e-11	16.9394
TNS4	3.1437	9.03094	7.955	4.34921e-11	4.17044e-10	14.7899
FAM150A	3.13503	3.14818	9.50005	9.14448e-14	1.54261e-12	20.9148
IBSP	3.11636	1.85577	8.40115	7.24585e-12	8.26741e-11	16.5689
ZIC2	3.09604	2.86124	5.80021	2.3306e-07	1.06162e-06	6.3057
GJB4	3.09386	4.36913	7.62531	1.63903e-10	1.38702e-09	13.4742
NXPH4	3.08881	3.40562	7.55286	2.19387e-10	1.79443e-09	13.1853
ZIC5	3.07069	1.71249	5.92033	1.46044e-07	6.90846e-07	6.76495
MMP13	3.06884	2.2239	7.84742	6.70484e-11	6.20046e-10	14.3606
IL23A	3.04108	4.06222	12.0589	5.33367e-18	2.77919e-16	30.6143
CLEC5A	3.03395	3.92763	9.26822	2.28466e-13	3.53993e-12	20.0042
KRT75	3.0334	1.67909	5.95388	1.28119e-07	6.12265e-07	6.89368
PAH	3.02259	2.13774	6.24495	4.08611e-08	2.14711e-07	8.01848
MGC14436	3.02211	2.48067	11.1084	1.83171e-16	5.92205e-15	27.0962
TGFBI	3.01618	12.5245	12.2139	3.02805e-18	1.67532e-16	31.1773
FAM176A	3.01328	4.9773	9.04312	5.57993e-13	7.94424e-12	19.1164
SLC7A5	2.99295	10.3101	15.0842	1.47119e-22	3.08199e-20	41.0411
LOC286467	2.99048	2.00426	9.67773	4.54653e-14	8.25291e-13	21.6098
LMTK3	2.9709	5.66583	13.1052	1.23833e-19	1.00885e-17	34.3554
SLC6A6	2.95141	9.68205	14.483	1.07983e-21	1.69228e-19	39.0643
STC2	2.94803	6.9192	7.54687	2.24739e-10	1.83236e-09	13.1614
MLXIPL	2.94569	7.68439	8.86546	1.13179e-12	1.51866e-11	18.4135
MMP10	2.94225	3.70558	6.4951	1.51786e-08	8.60579e-08	8.99485
CXCL11	2.93388	5.68651	7.15652	1.07952e-09	7.67668e-09	11.6072
TMPRSS13	2.92185	5.51195	7.4265	3.6474e-10	2.84719e-09	12.6816
KAL1	2.91744	6.13746	9.0642	5.13146e-13	7.36706e-12	19.1997
AKR1C4	2.91522	1.52633	7.79068	8.42444e-11	7.6393e-10	14.1341
PRR7	2.91043	5.31493	17.6579	4.76904e-26	3.49673e-23	48.9876
SLC6A20	2.90097	6.27763	5.8624	1.8302e-07	8.49321e-07	6.54314
SLC35D3	2.89658	4.27037	6.3299	2.92133e-08	1.57332e-07	8.34916
C1orf170	2.8865	3.4818	17.8057	3.07818e-26	2.34055e-23	49.4195
JUB	2.88158	7.51112	19.2845	4.39415e-28	5.19128e-25	53.6038
CST2	2.87445	1.96084	9.5793	6.69356e-14	1.16654e-12	21.2251
PCSK9	2.87328	8.55229	7.96264	4.21764e-11	4.06242e-10	14.8204
C10orf81	2.86348	8.17068	10.8077	5.73281e-16	1.63238e-14	25.9609
SLC13A3	2.8526	4.53932	5.52538	6.72603e-07	2.80833e-06	5.266
LRRC8E	2.83288	6.88684	14.6125	7.00353e-22	1.14113e-19	39.4938
ASCL2	2.82552	8.5544	7.68525	1.28771e-10	1.11925e-09	13.7134
TNNI3	2.82067	1.94659	7.54978	2.22124e-10	1.81248e-09	13.173
RNF183	2.81936	4.38909	10.268	4.55431e-15	1.04004e-13	23.8988
WNT7B	2.8147	2.00424	9.65715	4.92911e-14	8.90014e-13	21.5294
SH3TC2	2.80248	6.44844	9.54185	7.75639e-14	1.3359e-12	21.0785
KIF26B	2.79914	5.11924	7.73751	1.04344e-10	9.24947e-10	13.922
SP5	2.79429	5.93823	8.03723	3.12464e-11	3.09598e-10	15.1181
WDR72	2.79315	6.00159	4.59165	2.16369e-05	6.88904e-05	1.88256
NOX4	2.78768	3.71274	7.64888	1.49067e-10	1.27461e-09	13.5683
KLHL35	2.78463	4.17148	10.9187	3.75719e-16	1.12278e-14	26.3813
IL24	2.77784	2.76532	6.62154	9.17921e-09	5.42456e-08	9.49125
CORIN	2.77736	3.62038	7.61396	1.71564e-10	1.44412e-09	13.429
MYADML2	2.77082	3.34629	6.05767	8.53537e-08	4.23264e-07	7.29319
KRT16	2.76815	1.93049	6.26145	3.82864e-08	2.02424e-07	8.0826
GLS2	2.76784	5.31565	13.0281	1.62615e-19	1.27423e-17	34.0846
NANOS3	2.75455	2.76247	6.97961	2.19487e-09	1.45796e-08	10.9051
PABPC1L	2.7488	6.8008	10.3412	3.4323e-15	8.06236e-14	24.1802
TMEM211	2.73428	2.7397	7.24776	7.48298e-10	5.47099e-09	11.9699
SHISA2	2.72464	4.64719	10.0613	1.01567e-14	2.12991e-13	23.1008
NFE2L3	2.70695	10.0231	16.2805	3.18445e-24	1.33422e-21	44.8368
FEZF1	2.70569	1.42115	6.36486	2.54398e-08	1.38609e-07	8.4855
MYOM3	2.69778	7.03579	6.65225	8.12204e-09	4.84866e-08	9.61207
SLC22A11	2.67678	2.60655	5.88961	1.64622e-07	7.71443e-07	6.64725
LOC100127888	2.66637	4.82229	7.33064	5.36301e-10	4.04789e-09	12.2997
CCNO	2.6605	5.50397	8.7201	2.02144e-12	2.57445e-11	17.8371
SPP1	2.65845	8.96148	5.24183	1.9757e-06	7.54063e-06	4.21171
RHPN1	2.65782	6.88278	11.8357	1.21184e-17	5.6672e-16	29.798
TNFRSF6B	2.65606	7.26142	6.7579	5.32865e-09	3.30007e-08	10.0284
PVT1	2.65428	5.75978	18.7943	1.75138e-27	1.89242e-24	52.2437
FAM40B	2.65307	5.73152	10.9093	3.8945e-16	1.16212e-14	26.3456
SRPX2	2.64854	7.58605	6.34895	2.70932e-08	1.46683e-07	8.42343
KRT7	2.64752	5.07391	7.98093	3.91858e-11	3.80371e-10	14.8934
FER1L4	2.64363	6.2043	7.76393	9.38219e-11	8.41855e-10	14.0274
UCN2	2.63832	1.84876	11.4522	5.03294e-17	1.90991e-15	28.3815
ELF5	2.63248	1.58062	4.86509	8.02423e-06	2.7622e-05	2.84539
GSDMA	2.63045	4.37651	7.21918	8.39334e-10	6.06744e-09	11.8563
MACC1	2.62237	9.17091	14.102	3.91131e-21	5.1806e-19	37.787
PRKCG	2.6188	2.85585	6.05528	8.61551e-08	4.26825e-07	7.284
IRX5	2.61767	2.15431	7.59716	1.8356e-10	1.53315e-09	13.362
C19orf45	2.61545	3.94765	11.0831	2.0156e-16	6.48595e-15	27.001
ULBP1	2.61353	2.6832	9.99172	1.33156e-14	2.72281e-13	22.8314
AZGP1	2.60039	8.65891	8.06714	2.77059e-11	2.78551e-10	15.2374
RAET1L	2.59638	1.96846	7.47947	2.94747e-10	2.34087e-09	12.8927
DUSP4	2.58025	6.76857	6.84098	3.8232e-09	2.42854e-08	10.3565
DMBX1	2.57988	1.48346	8.18243	1.7432e-11	1.8209e-10	15.6973
LOC92659	2.57972	5.28034	17.2608	1.56536e-25	1.00427e-22	47.8145
EN2	2.57969	1.77334	5.93333	1.3882e-07	6.5941e-07	6.81482
SIX1	2.57845	2.2043	8.094	2.48696e-11	2.5301e-10	15.3446
MEX3A	2.57444	6.84185	11.9889	6.89559e-18	3.43778e-16	30.3588
WISP1	2.57392	5.58471	7.91401	5.129e-11	4.86591e-10	14.6263
LRRC36	2.55947	3.97325	9.61692	5.77311e-14	1.02334e-12	21.3722
PSAT1	2.55933	8.88782	10.2891	4.19731e-15	9.64958e-14	23.98
TNFRSF12A	2.55321	8.75082	11.415	5.78567e-17	2.15662e-15	28.2428
SPATA12	2.54428	2.93495	11.8022	1.37136e-17	6.28439e-16	29.6749
TREM1	2.5343	4.20294	6.41074	2.12122e-08	1.17319e-07	8.66471
DSC3	2.53168	4.78071	4.58307	2.23124e-05	7.09202e-05	1.85278
LGR5	2.52672	8.86333	6.81229	4.28795e-09	2.70367e-08	10.2431
VSNL1	2.52269	7.42651	10.3153	3.79432e-15	8.86205e-14	24.0805
CXCL3	2.51994	7.44846	6.35792	2.61487e-08	1.42057e-07	8.45841
IGF2BP3	2.51477	4.72106	5.04528	4.12385e-06	1.48975e-05	3.49356
C20orf46	2.50852	5.11854	8.32366	9.88753e-12	1.09488e-10	16.2602
LY6G6C	2.48703	2.74918	6.79125	4.66408e-09	2.92199e-08	10.16
MYEOV	2.48518	6.9585	6.76993	5.07873e-09	3.15767e-08	10.0758
UBD	2.48232	9.07386	7.16382	1.04833e-09	7.47041e-09	11.6362
GABRD	2.47456	3.28922	15.7691	1.6043e-23	4.99034e-21	43.2365
PPBP	2.46507	2.68375	4.07711	0.000130563	0.000359119	0.149335
HEPHL1	2.45244	2.01064	4.90299	6.98101e-06	2.42874e-05	2.98087
KLC3	2.44943	2.64012	9.01763	6.17505e-13	8.68314e-12	19.0157
CXCL1	2.4484	8.56167	7.10332	1.33651e-09	9.29487e-09	11.3958
SPTBN5	2.44778	4.50725	7.45479	3.25507e-10	2.56139e-09	12.7943
FUT1	2.44582	5.94404	14.0045	5.453e-21	6.9105e-19	37.4572
MPP6	2.44579	5.34759	10.0526	1.05071e-14	2.19441e-13	23.0671
TNNT1	2.44429	2.56986	4.6818	1.56421e-05	5.11601e-05	2.19704
APOC2	2.44361	5.41735	7.47477	3.00373e-10	2.38003e-09	12.8739
SP8	2.43763	1.2669	6.9236	2.74686e-09	1.79139e-08	10.6833
PITX2	2.43612	6.73647	4.82234	9.38454e-06	3.18612e-05	2.69313
KIAA1549	2.42442	8.09685	15.3053	7.14872e-23	1.61278e-20	41.7564
SLC7A11	2.41724	7.48946	9.25829	2.37623e-13	3.67073e-12	19.9651
NEK5	2.4166	2.2432	9.34059	1.71585e-13	2.73284e-12	20.2889
BTBD16	2.41649	1.96145	9.69904	4.18182e-14	7.67227e-13	21.693
MSX1	2.41434	5.19087	8.78615	1.55287e-12	2.03061e-11	18.0991
TMPRSS3	2.41045	5.76302	7.94575	4.51411e-11	4.31848e-10	14.753
PPAPDC1A	2.40884	3.69275	6.23944	4.17585e-08	2.19091e-07	7.99708
CELSR3	2.40829	7.09336	9.43466	1.18339e-13	1.94983e-12	20.6584
WDR66	2.40685	3.60439	8.59294	3.36089e-12	4.09734e-11	17.332
MTHFD1L	2.40234	8.66209	16.1908	4.21847e-24	1.63406e-21	44.5586
ARNTL2	2.38227	6.47072	12.8736	2.81404e-19	2.05757e-17	33.5395
SERPINA4	2.37958	1.27908	9.21926	2.77356e-13	4.21787e-12	19.8114
TEAD4	2.37151	7.96078	15.7711	1.59413e-23	4.99034e-21	43.2428
KRT6C	2.36132	1.55114	6.16283	5.64709e-08	2.89909e-07	7.6998
LY6G6E	2.35969	1.34088	8.47554	5.37768e-12	6.30159e-11	16.865
AQP9	2.35627	5.21767	4.92859	6.35289e-06	2.22682e-05	3.07263
GDF15	2.34936	9.90457	7.0304	1.79057e-09	1.21804e-08	11.1065
ATHL1	2.34382	8.53881	7.83632	7.01103e-11	6.46324e-10	14.3163
XKRX	2.33568	5.72287	8.20088	1.61867e-11	1.70242e-10	15.7709
OXTR	2.3335	4.19858	11.5189	3.92375e-17	1.53437e-15	28.6292
PGC	2.33257	1.83163	6.48589	1.5744e-08	8.91163e-08	8.95877
COL1A1	2.32211	14.0245	6.42611	1.99585e-08	1.11073e-07	8.72479
BMP7	2.31937	7.87035	5.32652	1.43468e-06	5.61671e-06	4.52447
RPL36A	2.31932	6.36995	10.0367	1.11774e-14	2.32494e-13	23.0055
GRHL1	2.31189	5.49285	10.3762	2.99904e-15	7.10972e-14	24.3145
TFAP2A	2.30981	4.64963	6.05707	8.55528e-08	4.24016e-07	7.2909
LOC389791	2.29141	2.8225	10.4271	2.46415e-15	5.97979e-14	24.5099
SSTR5	2.28006	2.34182	5.94628	1.31978e-07	6.29092e-07	6.86451
GDPD5	2.2781	7.78725	9.20711	2.91035e-13	4.41607e-12	19.7635
BGN	2.27539	10.9408	7.12506	1.22484e-09	8.60574e-09	11.4822
FJX1	2.26975	5.10067	11.9658	7.5052e-18	3.67737e-16	30.2745
S100P	2.26891	10.5651	6.04972	8.80544e-08	4.34662e-07	7.26254
KCNH8	2.26464	5.20811	9.15058	3.64168e-13	5.40982e-12	19.5407
ALDH3B2	2.26324	3.17652	5.18151	2.47884e-06	9.32576e-06	3.99013
SFRP4	2.26139	7.74153	4.47855	3.23847e-05	9.97536e-05	1.49227
LEF1	2.25961	6.86068	9.90061	1.89976e-14	3.75381e-13	22.4779
TM4SF19	2.2568	2.33946	6.90224	2.99213e-09	1.93719e-08	10.5987
TMEM132A	2.25128	8.29443	15.2187	9.47606e-23	2.09187e-20	41.4771
GABRE	2.24485	7.45807	7.81304	7.69951e-11	7.0473e-10	14.2234
LOC554202	2.24367	1.43924	6.47329	1.65516e-08	9.33786e-08	8.90942
PHLDA1	2.2428	10.2878	8.5845	3.47629e-12	4.22547e-11	17.2984
CARD14	2.23767	4.90768	9.57826	6.72102e-14	1.17012e-12	21.221
ABCC2	2.22952	4.04364	5.73737	2.97328e-07	1.32143e-06	6.06658
C5orf46	2.22862	1.30145	6.6961	6.81935e-09	4.13838e-08	9.78471
DNAH2	2.22789	4.30705	6.47221	1.66222e-08	9.37512e-08	8.90522
CHST4	2.22776	2.19954	5.4039	1.0695e-06	4.29516e-06	4.81184
TP73	2.21403	4.44456	7.68678	1.27979e-10	1.11425e-09	13.7195
CDC25B	2.21385	10.5711	13.0769	1.36847e-19	1.10609e-17	34.2561
CDKN2A	2.20953	5.39285	6.73705	5.79131e-09	3.56723e-08	9.94612
AADAC	2.2054	2.26142	5.39622	1.10121e-06	4.40698e-06	4.78325
RHCG	2.20524	3.34748	5.61873	4.70008e-07	2.01699e-06	5.61731
STC1	2.2008	7.21078	7.99403	3.71735e-11	3.62897e-10	14.9457
SERPINE1	2.19976	8.30776	5.70829	3.32723e-07	1.46395e-06	5.95619
SNORD1C	2.19169	3.89472	9.86279	2.20227e-14	4.27744e-13	22.3309
ANLN	2.19059	9.15494	15.0428	1.68513e-22	3.38804e-20	40.9065
GOLGA7B	2.18715	6.11326	8.90411	9.7021e-13	1.32085e-11	18.5666
GRIN2B	2.18167	3.0946	6.92326	2.75067e-09	1.79331e-08	10.6819
TNFSF9	2.17652	5.28653	6.86605	3.45843e-09	2.21257e-08	10.4556
GJA3	2.1757	2.08764	6.41113	2.11799e-08	1.17203e-07	8.66621
SLC11A1	2.17522	5.96961	7.07776	1.48086e-09	1.0202e-08	11.2944
GPR109B	2.17144	3.64649	4.67306	1.61436e-05	5.26747e-05	2.16643
ANKRD13B	2.16968	7.0789	13.4876	3.24042e-20	3.19836e-18	35.6874
GTF2IRD1	2.16717	9.35225	15.5236	3.52706e-23	9.28341e-21	42.4563
LOC84740	2.16463	3.38335	4.48361	3.18082e-05	9.81842e-05	1.50964
MIR17HG	2.15937	5.51869	10.2599	4.70068e-15	1.0699e-13	23.8673
GALNT6	2.15802	9.46743	10.1604	6.91102e-15	1.51423e-13	23.4839
CAMKV	2.15387	1.98487	5.50995	7.13548e-07	2.96902e-06	5.2081
SEC14L2	2.15198	6.32414	10.3019	3.99558e-15	9.26884e-14	24.029
CELSR1	2.14712	8.36813	8.19611	1.64997e-11	1.7309e-10	15.7518
SNTB1	2.14434	9.23351	10.7787	6.40344e-16	1.80581e-14	25.8508
TM7SF4	2.14048	1.82158	6.90515	2.95746e-09	1.91777e-08	10.6103
SMOX	2.13996	7.74966	13.4922	3.18989e-20	3.1637e-18	35.703
PPM1H	2.1336	8.76618	12.5826	7.97296e-19	5.11515e-17	32.5042
COL27A1	2.131	6.77354	7.45689	3.22775e-10	2.54086e-09	12.8027
OSBPL3	2.12929	8.93361	19.6609	1.5464e-28	2.24098e-25	54.6299
XRCC2	2.12804	5.81296	13.3019	6.19984e-20	5.47363e-18	35.0428
GJB5	2.12525	2.96795	3.78402	0.000346839	0.000876705	-0.784664
NKPD1	2.12508	2.45964	8.06005	2.85069e-11	2.85486e-10	15.2091
TTC26	2.12488	5.83172	13.3871	4.60125e-20	4.23604e-18	35.3391
PRDM12	2.11602	1.96725	13.4683	3.46618e-20	3.34481e-18	35.6205
GPR3	2.11481	3.69472	8.59235	3.36883e-12	4.10458e-11	17.3296
NEBL	2.11202	9.7436	9.20298	2.95839e-13	4.48565e-12	19.7473
TRIP13	2.10592	7.90694	13.3519	5.2032e-20	4.69548e-18	35.2169
OSM	2.10447	5.09798	4.98652	5.12867e-06	1.82481e-05	3.28107
SHH	2.0946	5.48692	7.4882	2.84573e-10	2.26533e-09	12.9275
C1orf135	2.09198	5.635	13.8543	9.12082e-21	1.06392e-18	36.9464
XIRP1	2.09186	2.12099	5.98587	1.13063e-07	5.47708e-07	7.01662
SLC17A9	2.08462	8.53349	7.65626	1.44705e-10	1.24106e-09	13.5977
WNT3	2.082	3.2241	9.61817	5.7449e-14	1.01938e-12	21.3771
ITGBL1	2.07888	5.83896	4.61432	1.9947e-05	6.39561e-05	1.96134
SCD	2.07687	11.9434	7.59342	1.86348e-10	1.55013e-09	13.347
MFAP2	2.07531	7.58017	7.7261	1.09248e-10	9.63014e-10	13.8764
C7orf68	2.07429	8.18544	11.0228	2.53156e-16	7.9227e-15	26.7742
ONECUT2	2.07425	4.67648	5.88916	1.64908e-07	7.72428e-07	6.64554
HOXB8	2.07363	7.24094	4.42901	3.85886e-05	0.000117541	1.32289
GIF	2.06881	2.26827	4.30918	5.87485e-05	0.000173366	0.917305
IQGAP3	2.06548	9.24747	10.2572	4.74958e-15	1.07864e-13	23.857
ORC6L	2.06509	7.33134	13.0345	1.58967e-19	1.25042e-17	34.1072
UNC5CL	2.06241	6.89222	9.08163	4.78815e-13	6.95195e-12	19.2686
MMP8	2.06115	1.40182	6.51682	1.39234e-08	7.97118e-08	9.08002
RNF43	2.05921	11.2087	8.27223	1.21543e-11	1.31677e-10	16.0553
LPO	2.05417	1.2005	6.97387	2.24595e-09	1.48884e-08	10.8824
PLAC4	2.05329	2.69597	6.50191	1.47735e-08	8.39006e-08	9.02154
WDR62	2.04921	7.08775	9.43822	1.16691e-13	1.92733e-12	20.6723
MATN3	2.04602	4.21684	5.66032	4.00413e-07	1.74052e-06	5.77449
RECQL4	2.0421	8.27038	11.5705	3.23748e-17	1.30325e-15	28.8204
TAS2R38	2.04	1.66404	9.0509	5.40994e-13	7.7344e-12	19.1472
CCDC150	2.03993	4.00906	10.0208	1.18897e-14	2.46562e-13	22.9441
UBE2C	2.0378	9.58138	12.0311	5.90692e-18	3.00834e-16	30.5127
THBS2	2.03333	9.95126	4.46038	3.45387e-05	0.000105948	1.43002
MET	2.02665	10.8937	15.0499	1.64639e-22	3.37791e-20	40.9295
DSCR6	2.02611	2.47725	5.76109	2.7123e-07	1.2166e-06	6.15677
NPC1L1	2.02156	3.76393	4.37577	4.65408e-05	0.000139834	1.14197
ATP11A	2.01585	9.70102	10.8498	4.88296e-16	1.41164e-14	26.1206
DUSP5P	2.00926	1.36527	8.35966	8.55785e-12	9.59545e-11	16.4036
SERPIND1	2.00491	2.41769	4.50415	2.95706e-05	9.18434e-05	1.58018
PBX4	2.00226	4.28781	8.73845	1.87863e-12	2.41052e-11	17.9099
MYBL2	2.00195	9.95109	10.1316	7.72927e-15	1.67386e-13	23.3725
PLA2G3	2.00139	1.92172	4.2215	7.96343e-05	0.000228688	0.624362
C9orf140	2.00021	9.83158	11.4871	4.41776e-17	1.70482e-15	28.5112
CLDN14	1.99928	2.70914	5.7084	3.32584e-07	1.46365e-06	5.9566
C19orf59	1.99614	2.74926	4.80342	1.00562e-05	3.39955e-05	2.62595
FOXD1	1.99524	2.8265	4.23188	7.68283e-05	0.00022128	0.658883
UHRF1	1.99453	7.91264	11.7587	1.61073e-17	7.12678e-16	29.5149
TCF7	1.99125	8.95262	9.112	4.24419e-13	6.22826e-12	19.3884
CITED1	1.98552	3.32072	6.03332	9.38972e-08	4.61616e-07	7.19933
RAD54B	1.98505	6.52026	12.5094	1.03759e-18	6.47467e-17	32.2423
ARID3A	1.98277	7.15651	10.8251	5.36479e-16	1.53826e-14	26.0269
DIO2	1.97727	6.76919	6.80168	4.47366e-09	2.81127e-08	10.2012
NEB	1.97662	3.20119	6.36893	2.50331e-08	1.36575e-07	8.50139
SOX9	1.96711	11.3314	11.5736	3.20073e-17	1.29098e-15	28.8318
HABP2	1.96649	1.46905	4.01201	0.000162721	0.000439444	-0.0617233
C11orf82	1.9616	6.80707	12.8553	3.00344e-19	2.1703e-17	33.4748
SKA3	1.95512	7.88158	12.6478	6.30672e-19	4.18248e-17	32.7373
PDZD7	1.95438	2.72496	7.31125	5.79781e-10	4.34572e-09	12.2225
DSG1	1.94514	1.9161	7.69398	1.24323e-10	1.08426e-09	13.7482
GZMB	1.94472	6.18014	5.50373	7.30731e-07	3.03191e-06	5.18479
PAQR4	1.94382	9.37401	15.1366	1.23924e-22	2.65018e-20	41.2111
BRCA2	1.94372	6.94608	12.139	3.97978e-18	2.13412e-16	30.9055
SOX14	1.94254	0.971272	5.55586	5.98444e-07	2.51867e-06	5.38048
KIF14	1.93998	6.833	9.85218	2.29557e-14	4.44185e-13	22.2896
LOC646851	1.93942	4.45214	9.40173	1.34767e-13	2.19411e-12	20.5291
E2F7	1.9359	6.3309	11.1356	1.65303e-16	5.42788e-15	27.1983
AXIN2	1.93543	10.4744	6.90524	2.95638e-09	1.91768e-08	10.6106
TPX2	1.93108	10.3691	12.5234	9.86632e-19	6.22543e-17	32.2924
CXCL6	1.92973	4.4757	4.96239	5.60757e-06	1.98386e-05	3.19412
AMH	1.92715	2.48815	5.34324	1.34664e-06	5.30235e-06	4.58641
RHEBL1	1.92663	4.17377	9.34522	1.68478e-13	2.69286e-12	20.3071
SIX4	1.92657	3.65731	6.2209	4.49258e-08	2.34868e-07	7.92505
MCM10	1.9263	7.07661	10.0632	1.0081e-14	2.12053e-13	23.1083
CENPI	1.92189	5.79218	9.64941	5.08129e-14	9.15077e-13	21.4992
PMAIP1	1.91781	7.24314	11.3228	8.17029e-17	2.892e-15	27.8994
RDH16	1.91466	2.43374	6.7358	5.82022e-09	3.58181e-08	9.9412
DBNDD1	1.9104	7.40073	9.02679	5.95415e-13	8.39552e-12	19.0519
MME	1.90918	6.8858	4.97427	5.36662e-06	1.90321e-05	3.2369
TDGF1	1.90701	7.24833	4.40775	4.15909e-05	0.000125845	1.25052
CCL24	1.90431	6.17328	4.99137	5.03747e-06	1.79423e-05	3.29855
SPACA3	1.90368	1.91127	5.32306	1.45364e-06	5.68119e-06	4.51163
ULBP3	1.89774	4.58323	10.0531	1.04842e-14	2.19187e-13	23.0692
WISP3	1.89577	1.53737	3.79216	0.000337726	0.000856094	-0.759302
TROAP	1.89365	7.87972	10.4846	1.97501e-15	4.89697e-14	24.7301
PAX9	1.88944	3.66234	4.74976	1.22269e-05	4.07168e-05	2.4361
PLAU	1.88675	9.30849	7.99793	3.65961e-11	3.58112e-10	14.9612
FXYD5	1.88147	9.99651	15.6834	2.11061e-23	6.10456e-21	42.9649
SLC9A7	1.88103	3.9109	6.29609	3.33907e-08	1.78286e-07	8.21743
RELL2	1.88047	5.46489	8.64305	2.75049e-12	3.39961e-11	17.5311
FANCB	1.87741	4.40249	10.9637	3.16731e-16	9.66193e-15	26.5513
PNPLA3	1.87538	2.07166	6.05914	8.48607e-08	4.21328e-07	7.29889
ERCC6L	1.8732	6.80058	10.7899	6.13348e-16	1.74405e-14	25.8937
TDGF3	1.87231	4.1319	4.7958	1.03398e-05	3.4891e-05	2.59892
SLAMF9	1.87158	1.52741	6.38801	2.32112e-08	1.27277e-07	8.5759
BFSP1	1.87083	4.98974	9.62476	5.5979e-14	9.97612e-13	21.4029
ASPHD1	1.86489	5.75065	8.01242	3.45234e-11	3.39609e-10	15.0191
BRSK2	1.86439	4.24391	4.09419	0.000123199	0.000340553	0.205038
GRB7	1.86335	9.0576	8.85904	1.16112e-12	1.55295e-11	18.388
LRRC15	1.86282	7.04374	4.68171	1.56469e-05	5.11678e-05	2.19674
HOMER1	1.86179	6.28885	7.68549	1.28649e-10	1.11913e-09	13.7143
C19orf26	1.85982	2.57883	6.98749	2.12667e-09	1.41801e-08	10.9364
MTBP	1.85836	6.27491	11.8119	1.3231e-17	6.09043e-16	29.7106
CSF3	1.85125	3.7796	4.0267	0.000154854	0.000420135	-0.014252
LOC388796	1.85033	8.56651	10.7564	6.97056e-16	1.92605e-14	25.7664
MYC	1.85006	11.6271	9.43619	1.17629e-13	1.9397e-12	20.6644
KIF18B	1.84482	7.78408	10.4606	2.16646e-15	5.33942e-14	24.6381
BAAT	1.8415	1.55639	7.60408	1.7852e-10	1.4947e-09	13.3896
ENC1	1.84147	10.6963	15.5525	3.21348e-23	8.56788e-21	42.5485
TBX15	1.84006	2.49596	7.02997	1.79366e-09	1.21974e-08	11.1048
CEP72	1.83962	6.33711	14.0718	4.33536e-21	5.66911e-19	37.6849
C8ORFK29	1.83658	2.28587	7.78848	8.49926e-11	7.69695e-10	14.1254
RGS16	1.83572	7.50103	7.45038	3.31343e-10	2.60331e-09	12.7767
CPXM1	1.83557	6.94519	4.73966	1.26842e-05	4.21574e-05	2.40045
SRMS	1.83555	4.0747	5.17585	2.53207e-06	9.51555e-06	3.96938
DGAT2	1.83332	8.42893	8.98309	7.08442e-13	9.86725e-12	18.8791
ADAMTS4	1.8284	7.68982	4.61749	1.97208e-05	6.33102e-05	1.97239
PLEKHG4	1.82664	8.3935	9.45723	1.08262e-13	1.80114e-12	20.7469
CILP2	1.82617	3.49562	5.68573	3.6302e-07	1.5884e-06	5.87067
RAET1K	1.82519	1.48335	7.37479	4.49076e-10	3.44398e-09	12.4755
PUS7	1.82349	8.6893	17.599	5.68243e-26	4.02277e-23	48.8147
DNAH5	1.82108	3.15803	6.01984	9.89899e-08	4.84449e-07	7.14737
ADAMTS6	1.82068	4.33201	6.88817	3.16548e-09	2.04106e-08	10.5431
KCNK9	1.82023	2.3242	5.34228	1.35155e-06	5.31965e-06	4.58285
PPEF1	1.81316	1.66267	8.10857	2.34557e-11	2.39694e-10	15.4027
DSCC1	1.81265	7.28701	11.8834	1.01645e-17	4.83047e-16	29.9729
SLC22A3	1.81126	7.79347	6.44011	1.88807e-08	1.05446e-07	8.77954
COL22A1	1.80907	3.08096	5.63123	4.47917e-07	1.92985e-06	5.66452
KIAA1875	1.80784	3.16726	5.21706	2.16884e-06	8.21973e-06	4.1206
C2	1.80688	10.3217	8.86412	1.13783e-12	1.52478e-11	18.4082
SYT7	1.79937	9.42901	8.10686	2.3617e-11	2.41223e-10	15.3959
TMEM105	1.79819	3.04595	5.81574	2.19418e-07	1.00382e-06	6.36494
LY6G6F	1.79737	1.02735	7.45184	3.294e-10	2.59103e-09	12.7825
C9orf169	1.79732	2.23383	7.15044	1.10618e-09	7.8472e-09	11.583
TGIF2	1.79547	8.78	10.7308	7.68799e-16	2.09886e-14	25.6689
CLDN16	1.79185	1.50705	7.41641	3.79857e-10	2.95173e-09	12.6413
PTP4A3	1.79049	8.91366	6.95124	2.45913e-09	1.62073e-08	10.7927
PROX1	1.78435	6.65459	5.87409	1.74876e-07	8.14661e-07	6.58786
C1orf180	1.78077	2.30744	5.90452	1.55327e-07	7.30718e-07	6.70437
MS4A15	1.77844	1.95784	5.73824	2.96332e-07	1.31797e-06	6.06987
ECT2	1.77706	10.001	14.3217	1.85806e-21	2.68634e-19	38.5258
TH	1.77683	2.03945	5.89941	1.58455e-07	7.45096e-07	6.68477
PKMYT1	1.77509	8.35712	9.89081	1.97387e-14	3.88902e-13	22.4398
SHROOM4	1.77148	8.08229	7.2464	7.52394e-10	5.49898e-09	11.9645
TTYH3	1.77048	11.1785	12.7659	4.13213e-19	2.85632e-17	33.1577
TNFSF15	1.77047	5.09812	9.7719	3.14273e-14	5.91929e-13	21.9771
ZNF695	1.76818	4.48445	6.93693	2.60409e-09	1.70805e-08	10.7361
LOC84931	1.76602	0.883011	6.32874	2.93484e-08	1.58018e-07	8.34461
FAM72D	1.76587	5.60283	9.69101	4.31562e-14	7.90363e-13	21.6617
ATP6V1C2	1.76505	6.64874	10.5397	1.59839e-15	4.06125e-14	24.9406
DACH1	1.76172	8.15553	6.79784	4.54277e-09	2.85383e-08	10.186
GPR81	1.75868	2.47532	3.94847	0.00020138	0.000533874	-0.265749
IFITM1	1.75851	11.9389	8.96169	7.71404e-13	1.06934e-11	18.7945
CYP2D7P1	1.75579	3.33634	6.38584	2.34117e-08	1.2824e-07	8.56742
MMP12	1.7545	8.84145	4.45065	3.57479e-05	0.000109456	1.39677
SOX4	1.74891	10.7052	11.734	1.76448e-17	7.70741e-16	29.4242
IL1A	1.74889	3.48136	5.04607	4.11183e-06	1.48567e-05	3.4964
NSUN5P1	1.74884	6.66706	9.70424	4.09732e-14	7.52397e-13	21.7133
SPRR2D	1.74749	1.04741	4.90932	6.82031e-06	2.37646e-05	3.00353
SNAI1	1.74575	6.31405	7.69744	1.22606e-10	1.07019e-09	13.762
GAS2	1.74527	4.31898	6.3582	2.61188e-08	1.42004e-07	8.45953
TOP1MT	1.74325	9.5165	14.5244	9.40038e-22	1.48454e-19	39.2018
CSF2	1.74078	1.71083	5.93515	1.37838e-07	6.55354e-07	6.82179
DIAPH3	1.73832	7.52567	10.3121	3.84152e-15	8.96208e-14	24.0682
KRTAP5-1	1.73813	3.48416	8.78403	1.56608e-12	2.04397e-11	18.0907
LOC440925	1.73705	4.57627	5.76243	2.69832e-07	1.21059e-06	6.16184
AGT	1.73688	7.65156	5.93171	1.39701e-07	6.63442e-07	6.8086
SQLE	1.73685	10.0822	8.40952	7.00669e-12	8.01825e-11	16.6022
CYP27B1	1.73643	5.09858	9.71324	3.95519e-14	7.28906e-13	21.7484
DPF1	1.73418	1.83454	6.44905	1.82227e-08	1.02077e-07	8.81453
ADAMTS2	1.73178	7.30124	4.5589	2.43277e-05	7.68263e-05	1.76904
ITGA11	1.72963	8.07762	5.38559	1.14664e-06	4.57008e-06	4.74369
C9orf117	1.72702	2.63398	10.943	3.42575e-16	1.03428e-14	26.4732
CCDC19	1.72662	2.57725	10.2443	4.9925e-15	1.13005e-13	23.8074
BOP1	1.72617	8.44325	8.9738	7.35115e-13	1.02179e-11	18.8424
NUF2	1.72497	7.56014	9.42688	1.22032e-13	2.00426e-12	20.6278
HELLS	1.72424	7.0573	10.1307	7.75389e-15	1.67742e-13	23.3694
TOMM34	1.72171	10.0616	13.0122	1.72038e-19	1.33281e-17	34.0286
ISM2	1.7205	2.79746	3.80519	0.000323608	0.00082346	-0.718618
ZC3HAV1L	1.71957	5.37129	11.8559	1.12468e-17	5.30798e-16	29.8722
MGC16121	1.71887	2.23319	7.25245	7.3432e-10	5.38799e-09	11.9886
PSORS1C2	1.71793	1.80572	5.15286	2.76002e-06	1.02912e-05	3.88524
INHBB	1.71638	6.02109	4.64349	1.79601e-05	5.80845e-05	2.06304
C8orf73	1.71618	7.54145	7.0359	1.75156e-09	1.19387e-08	11.1283
JPH1	1.71308	8.5423	11.2772	9.69563e-17	3.33419e-15	27.7291
SPRR2A	1.71293	1.0936	4.45749	3.48927e-05	0.000106981	1.42017
TIMP1	1.71263	11.5553	8.43025	6.44792e-12	7.43266e-11	16.6848
PVRL4	1.70686	7.40613	6.15818	5.75147e-08	2.94825e-07	7.68177
CXCL10	1.70278	7.31932	4.13514	0.000107139	0.000299546	0.339138
GPT2	1.69938	9.71155	10.9265	3.64812e-16	1.09337e-14	26.4107
CNIH3	1.69867	4.54723	6.26511	3.77369e-08	1.99933e-07	8.09685
SPOCD1	1.69846	4.49412	5.87076	1.77157e-07	8.24726e-07	6.57513
COL12A1	1.69698	11.0438	5.35399	1.29281e-06	5.10609e-06	4.62631
C8orf51	1.69643	4.04513	7.05686	1.61036e-09	1.10386e-08	11.2114
TRPV4	1.69236	4.50283	6.42408	2.01198e-08	1.1188e-07	8.71685
TPRXL	1.69227	2.0298	4.92835	6.35853e-06	2.22842e-05	3.07176
P4HA3	1.69142	4.44552	4.70957	1.4147e-05	4.66416e-05	2.29451
ZNF469	1.6909	6.38385	5.77531	2.56685e-07	1.15768e-06	6.21089
EXO1	1.69036	7.27961	9.40233	1.34448e-13	2.19065e-12	20.5315
DOK7	1.68934	4.36569	5.56688	5.7366e-07	2.4253e-06	5.42193
SLC39A10	1.68893	8.58523	17.0896	2.62792e-25	1.5868e-22	47.3029
IER5L	1.68406	7.37352	7.56745	2.06873e-10	1.70635e-09	13.2435
KLHL31	1.68358	4.16052	8.47208	5.45272e-12	6.38588e-11	16.8513
FAM72A	1.68276	4.46417	8.82439	1.33317e-12	1.76239e-11	18.2507
RHBDF2	1.68232	9.0977	11.3519	7.32722e-17	2.62069e-15	28.0078
CHPF	1.68049	10.7872	12.499	1.07729e-18	6.68179e-17	32.205
FBXO41	1.67842	7.54327	7.25183	7.36154e-10	5.39952e-09	11.9861
GLYATL1	1.67208	2.98974	4.511	2.88594e-05	8.98655e-05	1.60373
FOXP3	1.67131	4.93672	5.74006	2.94246e-07	1.3101e-06	6.07681
SLC5A6	1.67084	10.145	10.1226	8.00426e-15	1.72613e-13	23.3378
ITGA2	1.66972	10.1103	10.5384	1.6062e-15	4.07605e-14	24.9358
C19orf51	1.66843	3.26138	5.51484	7.00303e-07	2.91805e-06	5.22646
KIF4A	1.66842	8.83017	9.42168	1.24559e-13	2.0376e-12	20.6074
PTK7	1.66722	9.7036	7.00639	1.97155e-09	1.32664e-08	11.0113
ANXA9	1.6653	5.80139	7.30249	6.0055e-10	4.47687e-09	12.1877
ATAD2	1.66434	9.35043	11.9986	6.65408e-18	3.34005e-16	30.3943
PALM3	1.66301	4.12839	4.64898	1.76084e-05	5.7019e-05	2.08221
NUP62CL	1.66218	5.78	8.29015	1.13109e-11	1.23446e-10	16.1267
JAG2	1.66113	8.54935	7.31454	5.72161e-10	4.2933e-09	12.2356
CXCL2	1.66088	7.15053	4.60977	2.02755e-05	6.4909e-05	1.94551
GSDMC	1.66059	1.2956	8.21153	1.5509e-11	1.63954e-10	15.8133
C7orf40	1.65878	8.28954	10.9623	3.18434e-16	9.69947e-15	26.5459
CDC6	1.65664	8.72168	9.32861	1.79908e-13	2.84553e-12	20.2418
CCR8	1.65295	2.25519	6.4105	2.12324e-08	1.17398e-07	8.66377
HAPLN3	1.65036	7.2672	7.68534	1.28723e-10	1.11925e-09	13.7138
TRPM2	1.64993	8.06662	6.16562	5.58539e-08	2.87029e-07	7.71062
PYCR1	1.647	10.6406	10.908	3.91323e-16	1.16433e-14	26.3408
RFC3	1.64684	8.72103	13.468	3.46933e-20	3.34481e-18	35.6196
PSIMCT-1	1.64513	4.20751	8.04894	2.98084e-11	2.96783e-10	15.1648
AP1S3	1.6445	7.71215	9.07445	4.92668e-13	7.12287e-12	19.2402
DSG4	1.64437	2.59219	6.60613	9.76041e-09	5.73994e-08	9.43064
KIAA1274	1.64271	8.7068	6.27434	3.63863e-08	1.93126e-07	8.13276
SLMO1	1.64195	4.88906	9.92261	1.74342e-14	3.4649e-13	22.5633
DNASE1L2	1.6398	2.81775	8.39056	7.56028e-12	8.58002e-11	16.5267
CEP55	1.63841	8.79931	9.94077	1.62419e-14	3.24996e-13	22.6338
KIF20A	1.63836	8.10582	8.82148	1.34871e-12	1.78064e-11	18.2392
E2F1	1.63639	8.34424	12.2132	3.03565e-18	1.67532e-16	31.1748
HECW2	1.63613	5.65781	7.28596	6.41808e-10	4.75508e-09	12.1219
SULF1	1.63608	10.9343	4.70269	1.45034e-05	4.77246e-05	2.27037
CXCL9	1.63574	8.08184	4.10839	0.000117382	0.000325876	0.251463
PODNL1	1.63479	5.85866	7.24493	7.56843e-10	5.5256e-09	11.9587
GINS1	1.63462	8.56856	8.72762	1.96162e-12	2.50449e-11	17.8669
IGFL4	1.63429	0.866109	7.11857	1.25715e-09	8.80562e-09	11.4564
C15orf42	1.63404	7.14718	8.70301	2.16435e-12	2.73609e-11	17.7692
S100A11	1.63263	12.0753	11.8324	1.22662e-17	5.72332e-16	29.7859
C2orf48	1.63261	2.33596	7.63945	1.54835e-10	1.31681e-09	13.5307
CPA4	1.63198	1.18554	7.88608	5.73888e-11	5.38233e-10	14.5149
SNHG4	1.63144	4.28209	7.76017	9.52498e-11	8.53176e-10	14.0124
HJURP	1.63139	8.07025	10.9005	4.02701e-16	1.19596e-14	26.3123
SP6	1.63041	7.61847	5.83138	2.06482e-07	9.49189e-07	6.42463
ACBD7	1.62952	5.04637	6.67916	7.29602e-09	4.39973e-08	9.71798
AMELX	1.62942	0.894328	6.34573	2.744e-08	1.48326e-07	8.41088
EME1	1.62903	5.63963	11.1745	1.42746e-16	4.75743e-15	27.3443
ASB9	1.62818	6.16484	5.87717	1.72796e-07	8.05885e-07	6.59962
ZP3	1.62753	7.7911	9.24556	2.49913e-13	3.84036e-12	19.915
MFI2	1.6274	8.30312	6.60467	9.81737e-09	5.77013e-08	9.42489
PDPN	1.62696	8.11754	5.97813	1.16533e-07	5.62261e-07	6.98689
OTUB2	1.62501	6.56971	9.74214	3.53151e-14	6.59708e-13	21.8611
EFNA3	1.62341	8.52729	7.6142	1.71399e-10	1.44378e-09	13.4299
LZTS1	1.62112	6.00916	6.57166	1.11956e-08	6.52046e-08	9.29521
C5orf34	1.61853	5.36178	10.9351	3.5302e-16	1.06365e-14	26.4433
FGFRL1	1.61761	9.306	9.20171	2.97329e-13	4.50492e-12	19.7423
LRRC16B	1.61672	4.12234	5.50518	7.26677e-07	3.01936e-06	5.19024
SERPINB7	1.61213	1.19014	4.42034	3.97865e-05	0.000120831	1.29336
CBX8	1.60923	7.16158	14.7748	4.08013e-22	7.09874e-20	40.0297
RAD54L	1.60873	7.49741	9.32725	1.80878e-13	2.85867e-12	20.2365
DYX1C1	1.60445	4.25443	5.92233	1.44909e-07	6.86692e-07	6.77262
LIF	1.60286	8.48016	7.43416	3.53673e-10	2.76501e-09	12.7121
PPAT	1.60154	8.39625	14.3556	1.6573e-21	2.50179e-19	38.6392
SLC2A1	1.6001	11.3503	7.6671	1.38528e-10	1.19294e-09	13.641
PRSS1	1.59924	1.35365	4.29158	6.24602e-05	0.000183344	0.858264
TMPRSS5	1.59783	2.3902	4.6327	1.86716e-05	6.01864e-05	2.02538
ZSWIM4	1.59746	7.68638	11.9186	8.92863e-18	4.30293e-16	30.1018
PMFBP1	1.59683	4.58797	5.33243	1.40294e-06	5.50085e-06	4.54635
CHTF18	1.59671	8.18957	9.93477	1.6626e-14	3.32359e-13	22.6105
DLX4	1.59654	2.53567	7.31105	5.80242e-10	4.34758e-09	12.2218
MEGF6	1.59607	7.95046	7.02503	1.82957e-09	1.24087e-08	11.0852
CDH11	1.5956	9.24358	7.55396	2.18412e-10	1.78788e-09	13.1897
C16orf59	1.59495	6.38342	9.50006	9.144e-14	1.54261e-12	20.9148
ACCN2	1.59471	7.33925	5.85698	1.86922e-07	8.66256e-07	6.52241
ALG1L	1.59377	4.70116	5.75252	2.80393e-07	1.25441e-06	6.12415
LOXL2	1.59367	9.46604	7.07882	1.47455e-09	1.01688e-08	11.2986
KISS1	1.5915	1.72701	5.23153	2.05386e-06	7.8138e-06	4.1738
SLCO5A1	1.58813	4.0398	6.25201	3.97387e-08	2.09379e-07	8.04592
NSUN5P2	1.58779	8.11374	9.68243	4.46341e-14	8.12356e-13	21.6282
BMP4	1.58717	9.54608	7.08834	1.41932e-09	9.82424e-09	11.3364
RAB36	1.58467	6.77518	6.1502	5.93485e-08	3.03392e-07	7.65086
ProSAPiP1	1.58401	8.38466	7.46642	3.10641e-10	2.4557e-09	12.8406
SLC26A9	1.58011	1.14416	4.14899	0.000102182	0.000287174	0.384643
FCHO1	1.57826	7.35097	6.01872	9.94251e-08	4.86e-07	7.14305
DKC1	1.57637	10.9906	16.5885	1.2206e-24	5.96643e-22	45.7852
SPHK1	1.5761	6.7597	6.09169	7.46872e-08	3.74622e-07	7.42457
COL8A1	1.57553	7.40855	4.08846	0.000125624	0.000346659	0.186338
NPW	1.57228	2.62105	3.87152	0.000260101	0.000674056	-0.510248
OVGP1	1.57102	6.01357	9.24605	2.49427e-13	3.83576e-12	19.9169
VEGFA	1.56649	10.8289	9.57021	6.93719e-14	1.20491e-12	21.1895
UTP14A	1.56427	9.32117	14.0311	4.98101e-21	6.42453e-19	37.547
C10orf2	1.56398	8.62403	16.3168	2.84224e-24	1.21565e-21	44.9493
LRRC6	1.56384	5.6245	5.95818	1.25984e-07	6.03043e-07	6.91021
TMEM206	1.56277	7.11294	13.8574	9.02295e-21	1.06392e-18	36.9572
TFAP4	1.56216	8.46192	19.4692	2.62737e-28	3.37124e-25	54.1092
FOXA2	1.55948	9.11615	6.15916	5.72919e-08	2.93854e-07	7.68559
CCND1	1.55871	11.4117	13.1874	9.26695e-20	7.73376e-18	34.6434
CDC45	1.55625	7.75904	7.68334	1.29762e-10	1.12596e-09	13.7058
LBX2	1.55553	2.82856	8.22669	1.45928e-11	1.55309e-10	15.8738
RRP12	1.555	9.55248	11.6778	2.1735e-17	9.20173e-16	29.2168
FAM89A	1.55436	6.92783	10.2197	5.49189e-15	1.23628e-13	23.7126
DHDPSL	1.55418	2.34242	4.75928	1.18112e-05	3.94409e-05	2.46969
SPDYC	1.55221	1.16169	5.19178	2.38502e-06	8.98596e-06	4.0278
COL5A2	1.55049	10.8673	5.47307	8.21592e-07	3.37751e-06	5.07
ATAD3C	1.54583	4.85027	5.27988	1.7115e-06	6.61468e-06	4.35199
PAEP	1.54539	0.852786	6.85016	3.68535e-09	2.34751e-08	10.3928
POLR3G	1.54452	6.12113	8.88323	1.05437e-12	1.42035e-11	18.4839
FKBP10	1.54449	10.0392	6.66268	7.79133e-09	4.6697e-08	9.65312
C19orf28	1.5442	9.60453	15.1065	1.36737e-22	2.89404e-20	41.1136
C20orf199	1.54403	10.4552	7.65628	1.44694e-10	1.24106e-09	13.5978
SPNS3	1.53623	4.50453	6.73509	5.83678e-09	3.59092e-08	9.9384
C20orf20	1.53606	8.92666	14.5547	8.49299e-22	1.3622e-19	39.3025
SPNS2	1.53429	9.51959	8.072	2.71692e-11	2.73963e-10	15.2568
TMED7-TICAM2	1.53411	5.51629	4.01459	0.000161309	0.000436086	-0.0533792
SNORA39	1.53398	2.74755	7.5089	2.61832e-10	2.10388e-09	13.01
NR0B2	1.53387	4.4075	3.92008	0.000221387	0.000581359	-0.35631
HIST3H2A	1.53302	5.47721	5.38765	1.13767e-06	4.53609e-06	4.75138
IRAK2	1.53165	7.16586	6.77335	5.00976e-09	3.11857e-08	10.0893
REEP6	1.52932	7.82107	6.75431	5.40569e-09	3.34072e-08	10.0142
UBE2S	1.52697	8.60041	9.50921	8.82023e-14	1.499e-12	20.9507
CDCA5	1.52557	9.08609	10.5092	1.79667e-15	4.47642e-14	24.8243
E2F5	1.52522	7.66165	10.1444	7.3539e-15	1.60442e-13	23.4221
DDX12	1.52501	6.42524	9.19418	3.06335e-13	4.62431e-12	19.7126
LY6E	1.52465	10.5628	5.8252	2.11503e-07	9.70096e-07	6.40103
TIGD4	1.52416	3.5671	8.9504	8.06872e-13	1.11474e-11	18.7498
STX1A	1.52295	6.73042	8.62417	2.96614e-12	3.63987e-11	17.4561
CKAP2L	1.52282	7.19173	10.8644	4.61901e-16	1.34699e-14	26.1759
TNFRSF11B	1.52107	7.37254	5.06691	3.80492e-06	1.38306e-05	3.57203
ZNF280C	1.5209	6.45737	12.3391	1.92126e-18	1.10796e-16	31.6297
FGB	1.52084	1.07435	4.2221	7.94691e-05	0.000228278	0.62636
CDCA7	1.52009	10.6993	8.40707	7.07597e-12	8.09301e-11	16.5925
KIF18A	1.51863	6.8849	9.72031	3.84708e-14	7.12179e-13	21.776
PGF	1.51702	6.95246	5.45612	8.76529e-07	3.57614e-06	5.00662
DVWA	1.51574	0.929494	10.3315	3.56313e-15	8.36012e-14	24.143
LOC148709	1.51201	3.97287	6.83373	3.93572e-09	2.4923e-08	10.3278
GOLGA6L6	1.50938	0.870567	5.65896	4.02524e-07	1.74933e-06	5.76933
IRX3	1.50584	2.28982	3.87073	0.000260784	0.000675655	-0.512752
TYRO3	1.50528	7.15702	6.90597	2.94781e-09	1.91333e-08	10.6135
FGA	1.50359	1.44361	4.3138	5.78081e-05	0.000170984	0.93286
IL1RN	1.50338	7.14309	4.41796	4.01217e-05	0.000121795	1.28525
KRT83	1.50141	0.985973	4.54108	2.5926e-05	8.14728e-05	1.70745
CBX4	1.501	8.82193	13.9532	6.49813e-21	7.95836e-19	37.2831
PMEPA1	1.49997	10.7383	6.12647	6.5151e-08	3.30423e-07	7.55903
FOXS1	1.49847	4.4804	5.62134	4.65299e-07	1.99845e-06	5.62719
COL5A1	1.49578	11.3852	5.16185	2.66856e-06	9.98462e-06	3.91813
FANCA	1.49532	8.49849	8.52359	4.43619e-12	5.27633e-11	17.0562
RAD51AP2	1.49453	1.8645	5.76256	2.69694e-07	1.21028e-06	6.16234
HSPH1	1.49397	11.2008	7.727	1.08855e-10	9.59959e-10	13.88
SPRR1A	1.493	0.761619	4.24197	7.41929e-05	0.000214442	0.692479
FCN3	1.49256	3.32555	5.04918	4.06443e-06	1.4701e-05	3.5077
KCNJ14	1.4925	4.37736	8.11852	2.25359e-11	2.311e-10	15.4424
LRRN4	1.492	1.48991	6.54232	1.25815e-08	7.26578e-08	9.18003
LOC541471	1.49144	6.58568	7.94616	4.50669e-11	4.31339e-10	14.7547
CEACAM6	1.49072	14.1321	5.4162	1.0206e-06	4.1173e-06	4.85764
CCNF	1.49039	8.55689	10.2024	5.87151e-15	1.31024e-13	23.6461
CENPA	1.48923	7.06141	8.61208	3.11308e-12	3.8088e-11	17.4081
SH2D5	1.48801	1.62299	5.82458	2.12015e-07	9.72227e-07	6.39866
CDK1	1.48798	9.60186	9.07639	4.88879e-13	7.07806e-12	19.2479
KREMEN2	1.48628	4.08357	5.69597	3.48943e-07	1.5304e-06	5.90948
CCDC113	1.48542	7.07486	7.74213	1.02422e-10	9.11853e-10	13.9404
NKRF	1.4849	8.29642	15.3846	5.52662e-23	1.31932e-20	42.0114
NCRNA00152	1.48466	6.46706	7.00909	1.95029e-09	1.31449e-08	11.022
NOP2	1.48298	9.72411	14.3279	1.81955e-21	2.66824e-19	38.5466
POP1	1.48265	7.58563	11.5313	3.74688e-17	1.4793e-15	28.675
KRT15	1.48092	5.91341	5.21552	2.18146e-06	8.26449e-06	4.11493
CENPF	1.48085	9.6064	7.41974	3.74801e-10	2.91796e-09	12.6546
CKS2	1.48061	9.45145	7.73516	1.05335e-10	9.32528e-10	13.9126
FAM54A	1.47894	6.6598	8.90061	9.83815e-13	1.33583e-11	18.5527
FAM131C	1.47861	2.01082	5.46418	8.49979e-07	3.48166e-06	5.03674
TOP2A	1.47692	10.9996	10.0154	1.21441e-14	2.5028e-13	22.923
HSF4	1.47688	6.05437	7.24604	7.53503e-10	5.50513e-09	11.963
GRAMD2	1.47627	6.06328	5.54059	6.34518e-07	2.66231e-06	5.32312
DUSP14	1.47364	7.38933	8.78472	1.56178e-12	2.04095e-11	18.0934
CKAP2	1.46999	9.48902	13.5063	3.03672e-20	3.05607e-18	35.7519
MST1	1.4671	5.36363	6.38727	2.32791e-08	1.27581e-07	8.57302
NEK2	1.46634	8.40935	9.16855	3.39112e-13	5.06693e-12	19.6115
FGF18	1.46577	3.46136	5.65476	4.09091e-07	1.77449e-06	5.75345
ALDH4A1	1.4647	8.80465	8.30469	1.06694e-11	1.16947e-10	16.1847
GTSE1	1.46461	7.96363	8.64974	2.67783e-12	3.32181e-11	17.5577
LOC150197	1.46392	2.80067	5.86043	1.84431e-07	8.55675e-07	6.53559
RUNX1	1.46375	9.92496	10.3612	3.17683e-15	7.51387e-14	24.2572
KIF21B	1.46287	8.77326	6.85715	3.58374e-09	2.28633e-08	10.4204
SORD	1.462	9.71043	7.56385	2.09891e-10	1.72915e-09	13.2291
POLQ	1.46135	7.0507	7.43533	3.52015e-10	2.75415e-09	12.7168
MELK	1.46085	8.47514	8.45837	5.76064e-12	6.69683e-11	16.7967
FOXM1	1.4601	9.86207	8.29329	1.11689e-11	1.22032e-10	16.1392
ZDHHC9	1.45943	10.9676	11.771	1.53908e-17	6.869e-16	29.5602
ASPM	1.45919	8.37239	8.29595	1.10506e-11	1.20803e-10	16.1498
AURKA	1.45914	9.20353	9.40073	1.353e-13	2.20022e-12	20.5252
FGF20	1.45622	0.879636	4.03644	0.000149844	0.000407673	0.0172665
C17orf53	1.45435	6.23596	9.23514	2.60443e-13	3.98725e-12	19.874
SHCBP1	1.45382	7.37392	8.61684	3.05441e-12	3.7437e-11	17.427
GPR84	1.45188	3.71833	4.77118	1.13106e-05	3.78866e-05	2.51175
ANGPT2	1.45085	6.68544	7.98229	3.89715e-11	3.78469e-10	14.8988
C19orf48	1.44797	10.0753	11.2101	1.2482e-16	4.23562e-15	27.4778
NOD2	1.44702	6.20021	5.68287	3.67051e-07	1.60399e-06	5.85984
LAIR2	1.44687	1.56967	5.40398	1.06918e-06	4.29516e-06	4.81214
BUB1	1.44673	8.80057	8.16206	1.89189e-11	1.96065e-10	15.616
EVPL	1.44673	10.0784	6.78422	4.79692e-09	2.99634e-08	10.1322
KIF2C	1.44533	8.74373	9.73337	3.655e-14	6.79685e-13	21.8269
PLK1	1.43953	9.55957	9.22434	2.71827e-13	4.14299e-12	19.8314
SNHG1	1.43869	9.03061	10.5103	1.78922e-15	4.46871e-14	24.8284
PRR19	1.43726	4.21736	8.05438	2.91639e-11	2.91639e-10	15.1865
SNHG3	1.43677	6.11588	8.78674	1.54924e-12	2.02714e-11	18.1015
GNB1L	1.43525	6.98249	9.74709	3.46364e-14	6.48209e-13	21.8804
DUSP9	1.43496	1.36413	4.85021	8.47435e-06	2.90351e-05	2.79231
COL4A1	1.43344	12.2159	4.9189	6.58392e-06	2.30073e-05	3.03786
ADAMTS14	1.43328	6.72883	5.84605	1.95037e-07	9.01825e-07	6.48066
CAD	1.43187	10.2571	10.7512	7.10995e-16	1.96193e-14	25.7467
KIF23	1.42851	8.36444	9.28168	2.16614e-13	3.37412e-12	20.0572
CDCA3	1.42801	7.89136	9.43698	1.17262e-13	1.93521e-12	20.6675
CHAC1	1.42657	6.64229	6.70057	6.69886e-09	4.07369e-08	9.80232
FERMT1	1.42531	11.659	7.1833	9.69452e-10	6.94204e-09	11.7136
LOC652276	1.42506	5.81249	9.04022	5.64452e-13	8.00323e-12	19.105
RPS6KL1	1.42485	6.74756	9.16134	3.48941e-13	5.19866e-12	19.5831
PRR11	1.42412	6.70085	8.57852	3.56058e-12	4.31515e-11	17.2746
CALML3	1.42223	2.73653	3.8992	0.000237305	0.000619909	-0.422656
HKDC1	1.42127	9.68028	5.51471	7.00661e-07	2.91895e-06	5.22596
RNF32	1.42061	5.71514	8.7695	1.65959e-12	2.1537e-11	18.0331
CSE1L	1.4201	11.13	14.0316	4.97154e-21	6.42453e-19	37.5489
SPRR1B	1.41974	0.787188	4.84925	8.50399e-06	2.9127e-05	2.78892
TNFSF11	1.41888	5.2001	4.46607	3.38486e-05	0.000104013	1.44953
C20orf151	1.41806	7.46442	6.77198	5.03732e-09	3.13383e-08	10.0839
REM2	1.41747	3.43611	8.10526	2.37694e-11	2.42658e-10	15.3895
PLEKHA9	1.41732	5.58895	13.7346	1.37697e-20	1.53637e-18	36.5374
DNA2	1.41625	7.11716	9.33808	1.73298e-13	2.75799e-12	20.279
CACNA1D	1.41456	7.38899	6.92999	2.67748e-09	1.75283e-08	10.7086
AHCY	1.41386	12.5122	10.4675	2.10927e-15	5.20854e-14	24.6647
KAT2A	1.41183	10.102	16.5557	1.3511e-24	6.45071e-22	45.6848
ESPL1	1.41091	8.20918	7.54324	2.28039e-10	1.85632e-09	13.1469
DTL	1.41044	8.22105	8.90226	9.7738e-13	1.32797e-11	18.5593
PLXNA1	1.40918	10.145	11.5392	3.63823e-17	1.44753e-15	28.7043
NME1	1.40799	10.5197	9.07396	4.93637e-13	7.12683e-12	19.2382
BYSL	1.40797	8.67087	15.8935	1.07963e-23	3.57496e-21	43.6286
NOTCH3	1.40617	9.85594	5.5563	5.97432e-07	2.51492e-06	5.38214
F2RL2	1.40597	6.33504	4.43028	3.84161e-05	0.000117033	1.32721
C3orf26	1.40526	8.37367	13.4807	3.31999e-20	3.24569e-18	35.6633
CLSPN	1.40365	6.42472	6.21462	4.60519e-08	2.40205e-07	7.90067
CYP2S1	1.40124	10.9479	6.46514	1.70955e-08	9.62356e-08	8.87752
C1orf105	1.40057	0.783053	6.39158	2.28853e-08	1.25725e-07	8.58984
TMEM97	1.40056	9.79292	9.93014	1.69292e-14	3.38091e-13	22.5925
MSH5	1.39993	7.66756	8.54884	4.00959e-12	4.79423e-11	17.1567
TAF1A	1.39976	6.25956	11.5206	3.89888e-17	1.52756e-15	28.6355
FAM72B	1.39945	6.47615	7.97028	4.08998e-11	3.94955e-10	14.8509
RPLP0P2	1.39922	4.63404	5.89492	1.6125e-07	7.57196e-07	6.66759
EDNRA	1.39885	7.14466	6.10057	7.21279e-08	3.62849e-07	7.45888
C7orf52	1.39833	0.941244	5.0707	3.75163e-06	1.3649e-05	3.58578
CENPE	1.39767	7.70264	7.73988	1.03356e-10	9.1817e-10	13.9314
XPOT	1.39752	10.449	16.1188	5.29159e-24	1.97521e-21	44.3344
ZNRF3	1.39659	9.20727	9.77044	3.16085e-14	5.94795e-13	21.9714
KCNH4	1.39618	2.2827	5.05433	3.98736e-06	1.44349e-05	3.52637
FANCI	1.39518	9.47124	9.45789	1.07979e-13	1.7979e-12	20.7495
QSOX2	1.394	8.84622	13.2624	7.12085e-20	6.19454e-18	34.9052
GPR157	1.39355	5.26432	7.72076	1.11624e-10	9.8179e-10	13.8551
PERP	1.39256	12.7331	9.62075	5.68688e-14	1.01084e-12	21.3872
ATAD5	1.38976	6.65556	9.24346	2.51999e-13	3.86662e-12	19.9067
NCAPG2	1.38628	9.13637	11.6549	2.36606e-17	9.85298e-16	29.1324
DBF4	1.3862	8.38995	11.4128	5.83233e-17	2.16916e-15	28.2348
C2orf27A	1.38567	3.18505	6.11993	6.68483e-08	3.38279e-07	7.53371
F12	1.38393	7.70981	6.96157	2.3594e-09	1.56052e-08	10.8336
SLC12A2	1.37681	12.5674	8.26788	1.23682e-11	1.33853e-10	16.038
KIF4B	1.37568	3.131	7.73611	1.04937e-10	9.29404e-10	13.9163
WDR90	1.3747	8.95473	10.069	9.85727e-15	2.07985e-13	23.1306
RP1	1.37451	0.852645	6.53059	1.31822e-08	7.58068e-08	9.134
SCML1	1.37434	8.37524	8.88341	1.05364e-12	1.42031e-11	18.4846
C11orf84	1.37391	8.38921	11.1945	1.32353e-16	4.44714e-15	27.4195
COL5A3	1.3739	7.61682	4.13837	0.000105964	0.000296625	0.349729
TH1L	1.37277	10.7764	12.6971	5.28551e-19	3.58124e-17	32.9129
RRM2	1.37063	10.3718	7.42253	3.70623e-10	2.88982e-09	12.6657
KLHL17	1.36855	6.21622	9.45371	1.09773e-13	1.82119e-12	20.7331
C6orf222	1.36779	8.51277	5.0249	4.44834e-06	1.59854e-05	3.41973
LDLRAD3	1.36307	6.75847	5.27165	1.76552e-06	6.8055e-06	4.32162
CSMD2	1.36158	3.3749	5.18395	2.45619e-06	9.24561e-06	3.99909
RIPK2	1.36069	8.41802	13.6131	2.09614e-20	2.24135e-18	36.1201
RPGRIP1L	1.35978	6.64368	10.0362	1.1199e-14	2.32707e-13	23.0036
OLFML2B	1.35843	8.44814	4.24825	7.25985e-05	0.000210278	0.713392
PHF16	1.35748	8.22395	10.8754	4.42918e-16	1.30087e-14	26.2176
LYPD3	1.35646	5.40227	5.2315	2.05412e-06	7.8138e-06	4.17368
RBM28	1.35626	8.51141	14.8703	2.97438e-22	5.3565e-20	40.3431
GRAMD1A	1.35537	9.84043	11.8408	1.18896e-17	5.57292e-16	29.8169
MORC4	1.35528	8.91239	8.18342	1.73628e-11	1.81588e-10	15.7012
CCDC86	1.35493	9.32541	14.7162	4.95725e-22	8.41094e-20	39.8366
TBX20	1.3549	1.05128	3.95561	0.000196636	0.000522377	-0.242946
PDCD2L	1.3536	7.47576	12.9394	2.22694e-19	1.67469e-17	33.7721
CCDC64	1.35358	7.61729	8.02676	3.25897e-11	3.22286e-10	15.0763
CTSL2	1.35313	7.01137	4.77661	1.10889e-05	3.72412e-05	2.53098
MAD2L1	1.3525	9.1564	7.79778	8.18737e-11	7.45311e-10	14.1624
PYCRL	1.35231	8.48352	9.38816	1.42185e-13	2.30029e-12	20.4758
MKI67	1.35228	11.237	6.25871	3.87021e-08	2.04308e-07	8.07196
GTF3A	1.35225	11.0036	9.12441	4.0402e-13	5.963e-12	19.4374
IMPDH1	1.35084	10.1051	9.59515	6.28906e-14	1.10638e-12	21.2871
LOC151162	1.35062	11.1759	6.98919	2.11225e-09	1.41097e-08	10.9431
KCNJ15	1.35021	3.48525	3.77217	0.000360529	0.000907622	-0.821528
KRTAP5-4	1.35009	0.708525	7.49509	2.76789e-10	2.21367e-09	12.9549
ACTR3B	1.34899	7.3614	11.8241	1.26499e-17	5.87563e-16	29.7553
NEIL3	1.34887	5.67398	7.3875	4.26693e-10	3.28311e-09	12.5262
ZNF280A	1.348	0.741492	4.83092	9.09447e-06	3.09994e-05	2.72365
ZNF697	1.34633	6.91994	8.75814	1.7366e-12	2.24652e-11	17.988
CBFB	1.34554	9.80138	15.7329	1.80126e-23	5.43823e-21	43.1218
SGOL1	1.34182	6.47705	7.99474	3.70674e-11	3.62034e-10	14.9485
KIAA1751	1.34134	0.933678	5.07645	3.6721e-06	1.3381e-05	3.60668
PPM1N	1.34066	3.9929	5.09031	3.4871e-06	1.27521e-05	3.65709
NDUFA4L2	1.3397	7.12771	5.43346	9.55643e-07	3.87658e-06	4.92202
EZH2	1.33951	8.77281	9.71116	3.98756e-14	7.34212e-13	21.7403
KIAA1524	1.33897	7.43388	9.62453	5.60306e-14	9.97666e-13	21.402
HES6	1.33889	9.35787	6.84898	3.7028e-09	2.35789e-08	10.3881
THSD1P1	1.33541	7.22662	7.21764	8.44546e-10	6.10082e-09	11.8501
PITX1	1.33474	8.76467	6.067	8.22867e-08	4.09936e-07	7.3292
DNAJC2	1.3347	9.37669	16.2237	3.8046e-24	1.50209e-21	44.6608
SERPINB2	1.33464	1.66902	3.79969	0.000329504	0.000836699	-0.735822
MPP3	1.33407	4.71663	6.60627	9.75484e-09	5.7383e-08	9.4312
C9orf43	1.33374	2.46325	6.99134	2.09413e-09	1.40041e-08	10.9516
NOP56	1.33314	11.0314	11.8147	1.3092e-17	6.05359e-16	29.7211
ZNF692	1.33286	7.98991	11.4803	4.53294e-17	1.73946e-15	28.4856
FASN	1.33253	11.8119	6.89181	3.11974e-09	2.01347e-08	10.5575
NUDCD1	1.33169	8.92845	12.1204	4.25957e-18	2.2714e-16	30.8379
HMMR	1.33153	8.5851	6.73587	5.81871e-09	3.58181e-08	9.94146
CPNE1	1.33049	11.2489	8.89846	9.9228e-13	1.34643e-11	18.5442
B3GNTL1	1.32982	6.07198	10.6194	1.17694e-15	3.07804e-14	25.2452
FGGY	1.32823	7.87223	4.21101	8.25693e-05	0.000236324	0.589539
TDO2	1.32772	5.38462	4.19055	8.85969e-05	0.000252204	0.521771
RNFT2	1.32732	4.6308	6.99668	2.04979e-09	1.37434e-08	10.9728
CD3EAP	1.32672	8.54409	13.6809	1.6578e-20	1.82982e-18	36.3531
PSPH	1.32519	8.31682	10.8541	4.80359e-16	1.3929e-14	26.1369
BRIP1	1.32487	6.49015	7.9245	4.91705e-11	4.67781e-10	14.6682
SHMT2	1.32464	10.9661	11.5359	3.68331e-17	1.45981e-15	28.6921
ASNS	1.32445	9.57512	9.18026	3.23717e-13	4.85812e-12	19.6577
MTHFD2	1.32307	10.1217	8.12844	2.16548e-11	2.22398e-10	15.482
DDIT4	1.32217	10.6451	7.68159	1.30681e-10	1.13298e-09	13.6988
RAE1	1.32203	9.65101	11.1189	1.76034e-16	5.73647e-15	27.1357
TWIST1	1.32201	4.84333	4.79655	1.03114e-05	3.48066e-05	2.6016
HMGA1	1.32148	12.2079	10.6175	1.18565e-15	3.09688e-14	25.2378
FRMD5	1.32072	4.90641	4.00909	0.000164328	0.000443251	-0.0711355
S100A5	1.3197	1.24017	5.40274	1.07423e-06	4.30993e-06	4.80752
MND1	1.31773	6.12255	7.01208	1.92705e-09	1.30054e-08	11.0338
SLC12A8	1.31714	8.26403	7.68383	1.29507e-10	1.12422e-09	13.7077
FCGR3A	1.31698	8.83364	3.83203	0.000296299	0.000759618	-0.634571
METTL1	1.31627	8.13505	12.612	7.17255e-19	4.65989e-17	32.6094
GBX2	1.31584	0.814869	5.27739	1.7277e-06	6.66847e-06	4.34278
HECW1	1.31495	3.06396	4.3532	5.03738e-05	0.0001506	1.06561
EPHB3	1.31456	10.6674	5.27693	1.73067e-06	6.6787e-06	4.3411
LOC100134868	1.31405	2.50597	5.79311	2.39565e-07	1.08739e-06	6.27867
HSPD1	1.3136	13.219	11.976	7.22863e-18	3.55885e-16	30.3119
PSMC3IP	1.31142	5.93343	7.21595	8.50313e-10	6.13816e-09	11.8434
KIAA0895	1.31102	6.52787	7.46097	3.17521e-10	2.50527e-09	12.8189
IGFL1	1.30937	0.654686	5.21552	2.18141e-06	8.26449e-06	4.11495
PUS1	1.30775	8.93301	12.3943	1.57292e-18	9.22628e-17	31.8286
LOC642846	1.30695	6.90603	8.98904	6.91865e-13	9.66258e-12	18.9027
COL1A2	1.30648	13.9844	3.96627	0.000189738	0.00050536	-0.208782
C14orf72	1.30616	3.82192	4.25042	7.20555e-05	0.000208911	0.72062
C2orf61	1.30424	0.938531	7.59531	1.84932e-10	1.54148e-09	13.3546
DDX21	1.30387	11.1135	12.8354	3.22414e-19	2.29037e-17	33.4043
UBE2T	1.30329	8.27408	8.67581	2.41283e-12	3.02046e-11	17.6612
TNNT2	1.30295	1.34279	4.42521	3.9109e-05	0.000118914	1.30995
TTK	1.30247	8.06101	8.846	1.22309e-12	1.6284e-11	18.3364
IL20RA	1.30225	8.45615	6.20044	4.86991e-08	2.52967e-07	7.84562
SPON2	1.30073	9.58911	4.80169	1.012e-05	3.42053e-05	2.61981
WBSCR28	1.30042	1.22649	5.97046	1.20083e-07	5.77491e-07	6.95738
C2orf15	1.29989	6.03532	8.74638	1.82004e-12	2.34266e-11	17.9414
RAB15	1.29845	10.3963	8.15465	1.94903e-11	2.01479e-10	15.5865
CYP4F3	1.29761	6.90137	4.63897	1.82548e-05	5.89356e-05	2.04726
NFKBIL2	1.29556	8.57741	7.57624	1.99686e-10	1.65371e-09	13.2785
DNMT3B	1.29552	5.70444	6.67062	7.54865e-09	4.5431e-08	9.68437
CHSY3	1.29443	4.53441	6.24839	4.031e-08	2.12141e-07	8.03186
RAD51AP1	1.29324	7.87963	7.48248	2.912e-10	2.31539e-09	12.9047
BUB1B	1.29321	8.55174	7.44116	3.43856e-10	2.69339e-09	12.74
TRAF5	1.2922	9.43129	8.84275	1.239e-12	1.64745e-11	18.3235
ARHGEF38	1.29214	4.50018	7.22682	8.13995e-10	5.9176e-09	11.8866
PRIC285	1.29171	10.254	7.28151	6.53381e-10	4.83036e-09	12.1042
SRCIN1	1.28962	6.39626	4.82959	9.1388e-06	3.11195e-05	2.71892
ADAT2	1.28815	7.64987	9.6972	4.21201e-14	7.72077e-13	21.6858
GPR56	1.28718	11.5594	8.33501	9.44713e-12	1.04894e-10	16.3055
PAFAH1B3	1.28575	9.16563	11.3092	8.59885e-17	3.01253e-15	27.8486
URB2	1.28561	8.4519	11.7717	1.53499e-17	6.86563e-16	29.5628
PHKA1	1.28405	7.96076	5.83523	2.03418e-07	9.36359e-07	6.43932
ELFN1	1.28358	4.89672	5.97302	1.18884e-07	5.72126e-07	6.96725
ZBTB12	1.28335	6.79994	8.79612	1.4923e-12	1.96264e-11	18.1387
EXOSC5	1.28247	8.92324	11.1069	1.84229e-16	5.94688e-15	27.0904
LOC349114	1.281	7.09768	6.37377	2.45579e-08	1.34196e-07	8.52029
WFDC10B	1.279	1.05558	5.87784	1.72342e-07	8.04131e-07	6.60221
GOLGA8B	1.27649	6.9235	4.37314	4.69725e-05	0.000141069	1.13306
GINS4	1.27513	7.32319	7.64511	1.51346e-10	1.29087e-09	13.5533
NUP210	1.27509	10.2314	6.69197	6.93266e-09	4.2059e-08	9.76844
CCNE1	1.27447	7.03925	8.71285	2.08087e-12	2.64195e-11	17.8083
CENPP	1.27402	5.84895	8.13195	2.13519e-11	2.19617e-10	15.4959
CCNB1	1.27296	9.93492	7.17904	9.86192e-10	7.057e-09	11.6967
KCNQ1OT1	1.27154	5.91485	5.25762	1.86155e-06	7.13948e-06	4.26986
RP1L1	1.27127	1.70438	5.73576	2.99189e-07	1.32836e-06	6.06046
RPL22L1	1.27021	9.07631	5.06217	3.87271e-06	1.40484e-05	3.55481
TNFRSF10B	1.26834	10.2311	9.11742	4.15383e-13	6.12191e-12	19.4098
CDT1	1.26719	8.99504	7.89948	5.43778e-11	5.13276e-10	14.5683
WDR4	1.26648	7.80827	8.4611	5.69797e-12	6.64166e-11	16.8076
MFSD2B	1.26596	5.78907	9.42263	1.24096e-13	2.03327e-12	20.6111
CD44	1.26485	12.1644	11.659	2.32999e-17	9.72251e-16	29.1476
TMEM63A	1.26485	11.3069	9.51937	8.47426e-14	1.44379e-12	20.9905
C13orf29	1.2648	4.96272	4.95472	5.76894e-06	2.03674e-05	3.1665
STIL	1.26006	8.32166	8.53241	4.28229e-12	5.10246e-11	17.0913
BICD1	1.25961	5.96727	6.68116	7.23809e-09	4.37053e-08	9.72586
PLAC1	1.25929	1.5496	5.68412	3.65281e-07	1.5966e-06	5.86458
FAM92A1	1.25822	6.73236	5.75967	2.72731e-07	1.22277e-06	6.15135
SPATA17	1.25772	3.02494	5.2916	1.6374e-06	6.3522e-06	4.39525
LYAR	1.25752	8.66428	13.0206	1.67012e-19	1.30371e-17	34.0581
DNASE1	1.25699	6.54028	4.97307	5.39054e-06	1.9107e-05	3.23256
TIGD1	1.25555	6.28857	10.3943	2.79695e-15	6.68969e-14	24.3839
CCL20	1.25553	8.94235	3.83459	0.000293817	0.000753818	-0.626547
KPNA2	1.25499	10.8377	9.47288	1.01781e-13	1.70299e-12	20.8083
RNF24	1.25486	7.20094	8.8859	1.04322e-12	1.40718e-11	18.4945
KIAA1984	1.2548	5.26173	4.43135	3.82711e-05	0.000116643	1.33087
LST-3TM12	1.25474	0.694209	5.10885	3.25388e-06	1.19653e-05	3.72461
TBC1D16	1.25374	8.32855	9.09748	4.4961e-13	6.57443e-12	19.3311
PILRB	1.25214	9.28734	7.41412	3.83369e-10	2.9764e-09	12.6322
RUVBL1	1.2517	9.86671	14.0005	5.52936e-21	6.96428e-19	37.4434
PAICS	1.25155	11.4668	11.6229	2.66502e-17	1.09207e-15	29.014
ZMYND19	1.25148	8.3472	13.8555	9.08406e-21	1.06392e-18	36.9505
IFITM3	1.25113	12.5513	6.85468	3.61938e-09	2.30764e-08	10.4106
DDX11	1.25092	8.88129	8.9116	9.41701e-13	1.28374e-11	18.5962
PRR5-ARHGAP8	1.25067	5.02243	4.9454	5.97076e-06	2.10185e-05	3.13302
NMB	1.25039	6.02746	8.5825	3.50425e-12	4.25191e-11	17.2905
NCAPH	1.25024	8.37005	7.80186	8.054e-11	7.3521e-10	14.1787
C12orf48	1.24997	7.7902	7.03622	1.74926e-09	1.19271e-08	11.1296
TMEM67	1.24852	6.64618	9.17603	3.29194e-13	4.9295e-12	19.641
RANBP17	1.24806	5.49985	4.86312	8.08233e-06	2.78033e-05	2.83837
SLC7A1	1.24797	11.0879	9.13701	3.84307e-13	5.68841e-12	19.4871
HTRA4	1.24664	1.82443	4.38002	4.58518e-05	0.000137864	1.15636
MCM7	1.24618	11.694	13.339	5.44464e-20	4.88116e-18	35.1719
ANXA3	1.24615	10.0507	5.33286	1.40068e-06	5.49488e-06	4.54793
SAMD10	1.24612	7.37906	8.05294	2.93329e-11	2.93044e-10	15.1808
TRAP1	1.24538	11.3025	16.1566	4.69719e-24	1.7858e-21	44.4523
CMTM7	1.24491	7.87545	8.12971	2.15446e-11	2.21488e-10	15.487
ETV5	1.2437	7.74136	6.48213	1.59805e-08	9.03303e-08	8.94406
FAM60A	1.24333	10.8085	10.1864	6.24896e-15	1.38096e-13	23.5841
NXT1	1.24293	8.56343	7.60192	1.8008e-10	1.50654e-09	13.3809
DLEU2	1.24195	5.23286	7.96474	4.18214e-11	4.03095e-10	14.8288
GCSH	1.24013	3.98197	4.50056	2.995e-05	9.29094e-05	1.56785
WDR43	1.23964	10.0669	14.6566	6.04478e-22	1.00894e-19	39.6399
WNT5A	1.23799	8.18628	5.87114	1.76896e-07	8.23695e-07	6.57658
TTLL4	1.23792	8.88983	12.5518	8.90643e-19	5.64349e-17	32.3942
C9orf163	1.23791	3.19293	8.1168	2.26918e-11	2.3235e-10	15.4355
C10orf55	1.23762	2.66039	5.46193	8.57292e-07	3.50672e-06	5.02835
PTRH1	1.23647	7.19878	9.77323	3.1264e-14	5.90111e-13	21.9823
ZNF239	1.23591	6.20537	5.41316	1.03248e-06	4.15948e-06	4.84632
LCN12	1.23553	4.19154	4.88251	7.52723e-06	2.60421e-05	2.90758
DLEU7	1.23524	2.33378	5.87806	1.72197e-07	8.03823e-07	6.60303
ARHGEF19	1.23486	7.77516	7.78935	8.46975e-11	7.67361e-10	14.1288
RCOR2	1.23399	5.789	5.0391	4.21977e-06	1.52199e-05	3.47114
BLM	1.23363	7.32635	6.0629	8.36212e-08	4.15777e-07	7.31337
EPHB4	1.23304	11.1553	12.4332	1.3661e-18	8.1767e-17	31.9688
RRS1	1.23169	9.24385	10.7454	7.26985e-16	1.99799e-14	25.7246
?|155060	1.23162	6.7747	7.27582	6.68508e-10	4.93686e-09	12.0815
AEN	1.23106	9.20323	8.40373	7.17134e-12	8.19297e-11	16.5792
BEAN	1.23088	2.82969	4.0348	0.000150676	0.000409774	0.0119584
NLE1	1.23033	8.69092	13.5401	2.70027e-20	2.78575e-18	35.8685
INPP5D	1.23028	9.65429	6.41792	2.06171e-08	1.14335e-07	8.69277
RCN1	1.22963	11.2614	11.0012	2.74745e-16	8.53331e-15	26.6928
BIRC5	1.22865	8.38141	6.60309	9.87926e-09	5.80318e-08	9.41869
MCM2	1.22761	10.2528	10.3941	2.79905e-15	6.68969e-14	24.3832
SLC4A8	1.22718	5.43806	4.79003	1.05595e-05	3.55855e-05	2.5785
C12orf11	1.22713	8.99851	12.0626	5.26177e-18	2.74871e-16	30.6278
GPR4	1.22595	6.40409	6.50377	1.46643e-08	8.34042e-08	9.02886
EPR1	1.22467	8.79751	6.09925	7.25034e-08	3.64559e-07	7.45377
C20orf195	1.22456	2.31577	5.24979	1.91734e-06	7.33701e-06	4.241
KIF24	1.22418	6.93718	9.39071	1.40759e-13	2.279e-12	20.4858
BIRC7	1.22334	2.15181	3.85905	0.000271047	0.000700038	-0.549596
C9orf116	1.22297	4.45379	4.983	5.19603e-06	1.84526e-05	3.26836
F2R	1.22267	9.37852	7.2816	6.53151e-10	4.83036e-09	12.1046
RRP9	1.22123	9.09099	12.6094	7.23911e-19	4.68829e-17	32.6002
PLXNA3	1.22078	9.46885	8.45438	5.85351e-12	6.78941e-11	16.7808
PRKDC	1.2196	11.8084	7.15116	1.10299e-09	7.83002e-09	11.5859
CLLU1	1.21908	0.993236	4.15325	0.000100701	0.000283361	0.39867
LOC100130238	1.2187	3.27065	5.15526	2.73527e-06	1.02137e-05	3.89403
DDX31	1.21863	8.05377	14.8758	2.92095e-22	5.35226e-20	40.3611
S100A3	1.2185	3.7229	3.96555	0.0001902	0.000506525	-0.21111
NOLC1	1.21683	11.3585	14.4527	1.19545e-21	1.84531e-19	38.9634
ADAM8	1.21479	7.64791	4.35757	4.96077e-05	0.000148461	1.08039
SPC25	1.21473	7.20662	7.67852	1.32308e-10	1.1466e-09	13.6865
PLOD3	1.21473	11.3492	10.4043	2.69072e-15	6.48361e-14	24.4224
MSL3L2	1.21433	6.86217	9.26003	2.35992e-13	3.64828e-12	19.972
ASGR1	1.21351	4.27144	3.87279	0.000259009	0.00067165	-0.506232
KIAA1024	1.21301	4.33059	6.97448	2.2405e-09	1.48571e-08	10.8848
PCNXL2	1.21296	7.33724	7.7683	9.21853e-11	8.28256e-10	14.0448
INHBE	1.21188	2.48048	5.72081	3.16997e-07	1.40076e-06	6.00371
DHX34	1.21113	8.86985	12.3004	2.21064e-18	1.25026e-16	31.4902
R3HDML	1.20767	2.42089	4.24235	7.40965e-05	0.000214222	0.693731
CIT	1.20755	8.77015	6.69858	6.75228e-09	4.1001e-08	9.79447
NUFIP1	1.20628	7.69975	10.3057	3.93768e-15	9.14485e-14	24.0436
KCP	1.20542	3.56224	5.24678	1.93915e-06	7.40942e-06	4.22995
ABCC1	1.20537	10.286	8.49024	5.07013e-12	5.96845e-11	16.9235
MC1R	1.20279	5.84112	7.3435	5.09271e-10	3.86029e-09	12.351
FSCN1	1.202	9.48197	5.14261	2.868e-06	1.06648e-05	3.84778
GRINA	1.2009	11.418	9.06686	5.07748e-13	7.31001e-12	19.2102
SPIN4	1.1994	8.23981	10.4599	2.17237e-15	5.34756e-14	24.6353
CPNE9	1.1994	1.71764	4.72646	1.33066e-05	4.41047e-05	2.35395
FAM71E2	1.19825	0.787039	4.00542	0.000166371	0.000448301	-0.0829742
C16orf46	1.19772	4.62519	9.97632	1.41392e-14	2.87688e-13	22.7717
C6orf167	1.19689	7.60238	11.8474	1.16074e-17	5.46559e-16	29.8408
RNASEH2A	1.1964	8.96366	11.5493	3.50413e-17	1.40234e-15	28.7417
XPO5	1.19557	9.95891	12.1352	4.03542e-18	2.15748e-16	30.8917
MMP14	1.19554	11.9575	6.39835	2.22794e-08	1.22594e-07	8.6163
C13orf37	1.19535	8.99811	8.96044	7.7525e-13	1.07395e-11	18.7895
ETV7	1.19457	7.21706	4.65122	1.74668e-05	5.65907e-05	2.09004
DHCR7	1.19363	10.3268	8.09714	2.45576e-11	2.50083e-10	15.3571
RELT	1.19346	7.24381	7.89712	5.48958e-11	5.1769e-10	14.5589
DCAF13	1.19102	9.87102	11.8929	9.81435e-18	4.70715e-16	30.0077
PPP1R13L	1.19068	8.75868	7.7877	8.52608e-11	7.71783e-10	14.1222
TARBP1	1.19067	9.22049	10.3902	2.84075e-15	6.78147e-14	24.3684
FIGNL1	1.1886	8.14118	12.1701	3.55215e-18	1.92925e-16	31.0185
KNTC1	1.18803	8.52836	10.0151	1.21544e-14	2.5028e-13	22.9222
TMEM191A	1.18789	4.86136	5.40405	1.0689e-06	4.29516e-06	4.81239
CENPN	1.18735	8.54575	9.58288	6.59984e-14	1.15217e-12	21.2391
MSI2	1.18689	8.11108	10.2689	4.53865e-15	1.03762e-13	23.9022
NANP	1.18655	7.53445	8.8562	1.17431e-12	1.56855e-11	18.3768
HSP90AB2P	1.18642	5.23572	6.08057	7.802e-08	3.8991e-07	7.3816
FMO3	1.18508	3.6179	4.3188	5.68096e-05	0.000168273	0.949658
RBL1	1.18391	7.30625	7.56041	2.12823e-10	1.74771e-09	13.2154
GARS	1.18263	11.1766	13.3532	5.18062e-20	4.69548e-18	35.2212
NPM3	1.18257	8.92677	8.31075	1.0413e-11	1.14381e-10	16.2088
NXPH1	1.18191	0.648172	4.66643	1.65344e-05	5.38299e-05	2.14323
TEX10	1.18118	8.81263	12.2469	2.68513e-18	1.51029e-16	31.2968
GJC3	1.18086	1.68055	3.9477	0.000201905	0.000535128	-0.26824
KIAA0020	1.18043	9.44869	13.1443	1.07879e-19	8.96663e-18	34.4924
CHAF1B	1.17958	7.41715	9.37894	1.47457e-13	2.37807e-12	20.4396
CDR2L	1.17917	7.90128	6.77441	4.98858e-09	3.10821e-08	10.0935
NOP58	1.17838	10.3574	14.5798	7.81145e-22	1.26275e-19	39.3855
TRMT1	1.17823	9.21015	15.8351	1.2999e-23	4.23601e-21	43.4448
SNORA8	1.17604	8.07767	9.07155	4.9837e-13	7.18507e-12	19.2288
CMTM8	1.17508	7.31362	9.86162	2.21234e-14	4.29294e-13	22.3263
CLCN4	1.17461	6.35295	4.82994	9.1271e-06	3.10951e-05	2.72017
SKAP1	1.17432	6.72325	4.02082	0.000157958	0.000427821	-0.0332675
CDK4	1.17414	11.2439	11.3142	8.43996e-17	2.97208e-15	27.8671
TUBB3	1.17413	8.99567	5.14433	2.84957e-06	1.06e-05	3.85408
SBK1	1.17391	5.93529	4.11279	0.000115636	0.000321245	0.265852
SPARC	1.17294	13.5023	4.3681	4.78094e-05	0.000143351	1.11602
POLR1B	1.17052	9.23851	15.6346	2.46756e-23	6.93958e-21	42.8101
C13orf23	1.16924	10.612	8.20371	1.60041e-11	1.68494e-10	15.7821
STXBP1	1.1664	9.2481	4.83174	9.06722e-06	3.09219e-05	2.72657
SERPINE2	1.16627	10.1162	5.42974	9.69277e-07	3.92878e-06	4.90815
SLC34A3	1.16581	1.6411	6.2443	4.09669e-08	2.15212e-07	8.01593
NELF	1.16563	10.3292	7.39726	4.10274e-10	3.16651e-09	12.565
RNF39	1.16543	5.35481	4.22051	7.99072e-05	0.000229376	0.62107
YDJC	1.16423	8.65908	9.03865	5.67985e-13	8.04639e-12	19.0988
HAUS6	1.16321	8.68784	12.8522	3.03734e-19	2.1803e-17	33.4636
GOLT1A	1.16309	6.81225	4.42606	3.89924e-05	0.00011863	1.31283
LIPG	1.16287	8.52947	6.01626	1.00385e-07	4.90458e-07	7.1336
LRRC43	1.16275	1.94127	3.92044	0.00022112	0.000580733	-0.355157
NCRNA00105	1.16252	5.18626	4.80537	9.98489e-06	3.37821e-05	2.63287
CDCA2	1.16238	7.16314	5.46115	8.59862e-07	3.51513e-06	5.02542
TBX3	1.16207	8.86771	6.12986	6.42888e-08	3.26372e-07	7.57214
ZMYND15	1.16192	5.2071	5.40166	1.07866e-06	4.32434e-06	4.80349
CHD7	1.16136	9.67938	8.0627	2.82041e-11	2.82868e-10	15.2197
BRCA1	1.16037	8.50736	8.64186	2.76357e-12	3.41372e-11	17.5264
UCKL1AS	1.15883	4.02307	4.91304	6.72763e-06	2.34695e-05	3.01685
SLC1A5	1.15568	12.0559	8.0936	2.49101e-11	2.53295e-10	15.343
CDCA4	1.15533	8.49307	9.06888	5.03699e-13	7.2568e-12	19.2182
TXNRD3IT1	1.15522	6.82049	8.64459	2.73359e-12	3.38076e-11	17.5372
KIFC2	1.15155	8.32963	6.18993	5.07576e-08	2.62747e-07	7.80484
EIF5A2	1.1497	7.24416	6.80363	4.43898e-09	2.7929e-08	10.2089
IFI6	1.14892	9.89361	4.13979	0.00010545	0.000295468	0.3544
DLGAP5	1.14876	8.28552	6.75557	5.37848e-09	3.32595e-08	10.0192
EPHA1	1.14857	8.68641	6.70829	6.49572e-09	3.95601e-08	9.83273
AGAP3	1.14732	10.2554	15.0041	1.91357e-22	3.70619e-20	40.7805
GTPBP4	1.14689	9.97249	15.3128	6.97722e-23	1.60946e-20	41.7804
LGALS7	1.14686	1.14486	3.84436	0.000284506	0.000731485	-0.595833
PPP2R3B	1.14647	7.01945	8.25455	1.30484e-11	1.40327e-10	15.9848
LMNB2	1.14599	11.2612	8.54469	4.07676e-12	4.8717e-11	17.1401
PRC1	1.14566	9.70444	7.66133	1.41786e-10	1.21896e-09	13.6179
FANCD2	1.14529	8.29674	7.35122	4.93703e-10	3.75815e-09	12.3817
SLC27A5	1.14509	6.67957	5.38832	1.13481e-06	4.52728e-06	4.75384
ATAD3B	1.14427	8.53327	5.34063	1.35999e-06	5.34673e-06	4.57676
DUSP2	1.14394	7.19823	4.49292	3.07744e-05	9.5222e-05	1.54159
FAM83H	1.14361	11.1912	6.15415	5.84337e-08	2.9894e-07	7.66616
THY1	1.14356	10.6666	4.32861	5.48977e-05	0.00016301	0.982663
CLCN1	1.14322	1.65736	4.04839	0.000143911	0.000392883	0.0559947
POLD2	1.14314	10.9771	12.5948	7.62881e-19	4.9097e-17	32.5481
MGC72080	1.14308	6.50704	6.43304	1.94171e-08	1.08295e-07	8.75192
LIMK1	1.14301	9.50527	11.0284	2.47814e-16	7.79115e-15	26.7954
RCC1	1.14275	9.87013	8.4033	7.18377e-12	8.2026e-11	16.5775
SBSN	1.14272	0.925503	4.3507	5.08168e-05	0.00015177	1.05716
RTEL1	1.14227	9.13198	5.78134	2.50755e-07	1.13267e-06	6.23384
YY2	1.1416	4.18057	6.237	4.21624e-08	2.21097e-07	7.98759
ABHD2	1.14145	12.036	5.13031	3.00312e-06	1.11208e-05	3.80286
NOL6	1.14139	10.1123	10.9349	3.53342e-16	1.06365e-14	26.4424
TRIM59	1.14127	7.29007	8.22381	1.47628e-11	1.56874e-10	15.8623
WDR77	1.14062	9.89424	10.5433	1.57602e-15	4.00938e-14	24.9547
CENPH	1.14042	7.59047	8.53876	4.17473e-12	4.98008e-11	17.1166
TCOF1	1.14029	10.3836	8.77562	1.61955e-12	2.10572e-11	18.0574
PPRC1	1.14005	9.90047	10.0875	9.17161e-15	1.9492e-13	23.2023
DCUN1D5	1.13921	8.40636	11.1582	1.5177e-16	5.02556e-15	27.2833
IRAK1	1.13851	11.7456	8.5151	4.58966e-12	5.44028e-11	17.0224
DEPDC1B	1.13849	7.8067	6.70512	6.57838e-09	4.00398e-08	9.82025
AMPD2	1.13809	9.68018	15.2077	9.82481e-23	2.14578e-20	41.4412
C8orf30A	1.13794	9.28942	9.5001	9.14247e-14	1.54261e-12	20.915
CDC25C	1.13701	6.86097	7.18236	9.73143e-10	6.96605e-09	11.7098
TMEM161A	1.13555	9.24146	13.92	7.28091e-21	8.74135e-19	37.1702
POLE2	1.13495	6.55735	6.32058	3.03107e-08	1.62913e-07	8.31281
NUSAP1	1.13483	9.41124	6.71937	6.21478e-09	3.8007e-08	9.87641
ENGASE	1.13447	9.83218	5.41835	1.01226e-06	4.08688e-06	4.86567
BRIX1	1.13289	9.35192	13.0183	1.68364e-19	1.30928e-17	34.0501
KIFC1	1.13146	9.25587	7.56045	2.12784e-10	1.74771e-09	13.2156
SLC35E4	1.13122	7.74574	7.24987	7.41987e-10	5.43647e-09	11.9783
NME1-NME2	1.13089	6.66481	6.54512	1.24423e-08	7.19346e-08	9.19101
TSPAN5	1.13017	6.22482	6.3993	2.21964e-08	1.223e-07	8.61998
UBE2CBP	1.12964	6.09978	9.86949	2.14535e-14	4.18669e-13	22.3569
SFXN3	1.12911	9.49041	9.96623	1.47061e-14	2.97162e-13	22.7326
CNN2	1.12895	11.4934	10.0645	1.00308e-14	2.11214e-13	23.1132
C1orf112	1.12828	7.23956	9.56119	7.18794e-14	1.2453e-12	21.1542
CBX3	1.12822	11.741	11.7004	1.9988e-17	8.60278e-16	29.3002
VTCN1	1.12651	0.928484	4.25354	7.12799e-05	0.000206916	0.73104
ADCY3	1.12517	9.96338	8.14357	2.0378e-11	2.10231e-10	15.5423
PLAGL2	1.12455	10.3367	6.20071	4.86466e-08	2.52775e-07	7.84668
CDC25A	1.12427	8.05726	6.65286	8.10244e-09	4.83978e-08	9.61445
MEST	1.12418	10.2912	8.17437	1.80056e-11	1.87642e-10	15.6651
C16orf55	1.12304	7.09015	12.4144	1.46229e-18	8.62667e-17	31.9012
BHLHE40	1.12297	11.1901	7.55201	2.20136e-10	1.79912e-09	13.1819
FAM157A	1.12292	2.69756	4.23465	7.6095e-05	0.000219507	0.668113
GNGT1	1.12155	0.744061	4.80935	9.8407e-06	3.33327e-05	2.647
LAS1L	1.12137	9.77677	10.6676	9.78806e-16	2.61652e-14	25.4286
NT5DC2	1.12135	9.41895	8.32232	9.94072e-12	1.10018e-10	16.2549
NPFFR1	1.12132	1.14014	5.65726	4.05165e-07	1.75857e-06	5.76291
SLC3A2	1.12101	11.2401	12.8687	2.86344e-19	2.08463e-17	33.5222
ZNF121	1.1198	5.53822	7.77865	8.84224e-11	7.9794e-10	14.0861
CCT6A	1.11979	12.0019	14.3722	1.56729e-21	2.38344e-19	38.6947
KCTD14	1.11839	8.68263	7.12984	1.20154e-09	8.46814e-09	11.5012
TBX6	1.1183	4.39442	4.81951	9.48187e-06	3.21695e-05	2.6831
PIF1	1.11726	5.84899	5.68809	3.59732e-07	1.57503e-06	5.8796
FOXD4	1.11652	2.48445	4.15853	9.88959e-05	0.000278724	0.416056
WDHD1	1.11601	7.72779	8.42733	6.52397e-12	7.50768e-11	16.6731
PTTG1	1.1154	8.90667	7.08495	1.43871e-09	9.94165e-09	11.3229
LOC100133161	1.11492	4.41313	5.70678	3.34663e-07	1.47186e-06	5.95048
TAF1D	1.11472	9.21232	12.4907	1.10986e-18	6.86308e-17	32.1754
NOC3L	1.11218	8.3569	12.7137	4.97941e-19	3.40758e-17	32.9722
WDR75	1.11195	9.46487	14.1166	3.72189e-21	5.027e-19	37.8363
DSN1	1.1117	8.77425	11.0177	2.58126e-16	8.06596e-15	26.7549
NBEAL2	1.11147	10.6774	7.13182	1.19203e-09	8.40398e-09	11.5091
MCM8	1.1111	8.05735	8.3379	9.33825e-12	1.03938e-10	16.317
SNHG12	1.11089	7.55967	6.33274	2.88879e-08	1.55743e-07	8.3602
KCNN4	1.11075	9.82822	4.58398	2.22404e-05	7.07024e-05	1.85591
SLC25A22	1.11044	9.10201	8.25836	1.28501e-11	1.38414e-10	16
NPRL3	1.11031	9.37501	11.9814	7.08754e-18	3.5062e-16	30.3315
TEX19	1.11026	1.05897	4.77335	1.12213e-05	3.76304e-05	2.51945
MIF	1.10835	11.9177	6.45808	1.75813e-08	9.88344e-08	8.84988
RTKN	1.10731	9.89923	11.7826	1.47417e-17	6.637e-16	29.603
NOB1	1.10727	10.4355	13.7485	1.31255e-20	1.4786e-18	36.585
PSRC1	1.10673	7.2731	7.92662	4.87521e-11	4.64446e-10	14.6767
EIF2C2	1.10616	7.94955	8.14203	2.05044e-11	2.11323e-10	15.5361
NR2C2AP	1.10566	8.68793	12.1526	3.78686e-18	2.0513e-16	30.9549
FTSJ1	1.10476	9.39009	11.417	5.74097e-17	2.14685e-15	28.2505
RPP40	1.10471	6.82219	8.35826	8.60587e-12	9.64402e-11	16.3981
HSP90AB1	1.10418	14.4213	15.7599	1.65229e-23	5.06292e-21	43.2073
LOC100130776	1.10281	7.01159	7.90661	5.28395e-11	4.99445e-10	14.5968
PTTG3P	1.10248	2.07163	6.62823	8.93805e-09	5.29118e-08	9.51754
C4orf21	1.10221	6.05585	7.31812	5.63988e-10	4.23661e-09	12.2499
GNL3L	1.10178	9.58888	10.4391	2.35287e-15	5.73686e-14	24.5559
DDX10	1.10172	9.01271	13.8047	1.08158e-20	1.24049e-18	36.7772
SOX12	1.10138	8.37361	5.27268	1.75871e-06	6.78054e-06	4.32539
ICA1	1.10076	9.89501	8.14239	2.04749e-11	2.11125e-10	15.5376
CTPS	1.10059	9.31271	7.47228	3.03403e-10	2.40111e-09	12.864
PHLDA2	1.1004	8.68581	4.70746	1.42551e-05	4.69721e-05	2.28712
ZNF643	1.0996	4.88001	7.65298	1.4663e-10	1.25587e-09	13.5846
ALKBH2	1.09928	7.80189	9.3968	1.37417e-13	2.23193e-12	20.5097
ARHGAP39	1.09885	8.21874	8.07019	2.73674e-11	2.75688e-10	15.2496
IPO4	1.09878	9.93981	9.09585	4.5252e-13	6.61226e-12	19.3247
C22orf29	1.09847	8.7913	9.82266	2.5764e-14	4.9387e-13	22.1748
KIAA0406	1.098	9.28852	10.069	9.85683e-15	2.07985e-13	23.1306
GLA	1.09785	8.96926	7.57431	2.01242e-10	1.66526e-09	13.2708
AGRN	1.09777	11.4603	7.22286	8.27047e-10	5.99891e-09	11.8709
CASC5	1.09659	7.48701	5.65693	4.0569e-07	1.76048e-06	5.76165
HAUS5	1.09619	8.15234	12.3502	1.84518e-18	1.06709e-16	31.6699
NAT10	1.09541	10.3887	13.531	2.78634e-20	2.84595e-18	35.8374
POLR1C	1.09503	8.98397	12.2031	3.14914e-18	1.72866e-16	31.1383
PODXL2	1.09481	9.18769	6.8745	3.34351e-09	2.1444e-08	10.489
SRM	1.09433	9.98193	10.067	9.932e-15	2.09347e-13	23.1231
GGN	1.09428	2.07413	5.88866	1.65231e-07	7.73769e-07	6.64362
FAM53A	1.09417	3.9663	4.95016	5.86691e-06	2.06848e-05	3.1501
CCNB1IP1	1.09383	9.51122	8.10878	2.34351e-11	2.39694e-10	15.4035
KCNJ11	1.09376	5.71966	5.92226	1.44949e-07	6.86692e-07	6.77234
PABPC3	1.09272	8.44388	10.8139	5.59909e-16	1.59652e-14	25.9844
ZC3H8	1.09248	7.16128	10.2718	4.48851e-15	1.0273e-13	23.9133
TCFL5	1.09157	8.20511	7.81204	7.73048e-11	7.06935e-10	14.2194
DNAH14	1.09119	5.2572	4.56762	2.35813e-05	7.45954e-05	1.79922
SLC6A1	1.0903	3.45005	5.12648	3.04642e-06	1.12731e-05	3.78889
TMEM158	1.08998	7.02095	5.02565	4.43596e-06	1.59465e-05	3.42245
HEATR1	1.08966	9.71533	11.886	1.00677e-17	4.80673e-16	29.9824
POLR1A	1.08765	9.7894	8.36849	8.25977e-12	9.30941e-11	16.4389
C12orf34	1.08686	7.04303	5.09163	3.46992e-06	1.26938e-05	3.66191
HM13	1.08619	11.5777	9.36563	1.55417e-13	2.50056e-12	20.3873
GPSM2	1.08593	10.0559	6.88382	3.22105e-09	2.07104e-08	10.5259
SIGLEC15	1.08376	2.17434	3.93791	0.000208613	0.000551412	-0.299495
OTUD6B	1.08358	8.19624	8.90343	9.72852e-13	1.32269e-11	18.5639
CIRH1A	1.08261	9.83492	12.9443	2.18844e-19	1.65179e-17	33.7894
DCLK3	1.08213	3.27908	4.84774	8.55134e-06	2.92696e-05	2.78352
WDR74	1.08161	9.19734	16.8049	6.26608e-25	3.38533e-22	46.4443
C7orf47	1.08157	8.03516	9.78637	2.9697e-14	5.63474e-13	22.0335
FBXW10	1.08143	0.806892	5.1251	3.06213e-06	1.1319e-05	3.78387
GPX2	1.08113	13.1165	5.78427	2.47924e-07	1.12087e-06	6.24499
LOC440356	1.07943	0.638702	5.26945	1.78027e-06	6.85849e-06	4.31349
ZNF485	1.07942	5.89008	8.8511	1.19844e-12	1.59766e-11	18.3566
CAPN12	1.07929	7.58913	4.8312	9.08519e-06	3.09729e-05	2.72464
SLC25A32	1.07877	9.11142	11.1202	1.75144e-16	5.71713e-15	27.1408
PALB2	1.0776	8.24956	15.4962	3.85315e-23	9.82087e-21	42.3687
NCAPD3	1.07685	9.47085	10.62	1.17429e-15	3.07804e-14	25.2474
CDKN3	1.07657	7.86212	5.90815	1.53147e-07	7.21953e-07	6.71826
C1orf182	1.07551	1.5773	5.50421	7.29373e-07	3.0275e-06	5.18662
GPC2	1.07472	4.02315	4.7884	1.06227e-05	3.57809e-05	2.5727
TRAIP	1.07472	6.82037	8.4862	5.15287e-12	6.0589e-11	16.9075
DMRT3	1.07438	0.894911	4.08367	0.000127685	0.000351721	0.170722
PRR22	1.07391	5.19521	5.55452	6.01529e-07	2.53113e-06	5.37544
PPAN	1.07301	9.12919	12.2967	2.24082e-18	1.26385e-16	31.4767
TIMELESS	1.07241	9.48887	9.07704	4.87629e-13	7.06495e-12	19.2504
ZNF367	1.07227	7.73652	7.91377	5.13387e-11	4.86828e-10	14.6254
UGGT2	1.07191	8.41019	8.41709	6.79732e-12	7.78733e-11	16.6324
FAM19A5	1.0716	5.60728	4.01072	0.000163427	0.00044112	-0.0658729
FAM57A	1.07114	8.75898	6.25787	3.88304e-08	2.04828e-07	8.0687
MYO3B	1.07055	2.1579	3.93628	0.000209752	0.00055421	-0.304703
TGDS	1.07053	8.24685	7.52181	2.48576e-10	2.00679e-09	13.0615
GAPDHS	1.07031	1.42519	7.32927	5.39252e-10	4.06717e-09	12.2943
GNL3	1.06929	10.6753	10.9536	3.2907e-16	9.99379e-15	26.5132
RTDR1	1.06925	2.07264	4.8616	8.12764e-06	2.79405e-05	2.83293
PDCD11	1.06845	10.0536	8.84547	1.22566e-12	1.63078e-11	18.3343
RAD18	1.0683	8.0828	13.104	1.24342e-19	1.00899e-17	34.3513
CCDC148	1.0671	1.41357	4.96091	5.63839e-06	1.99408e-05	3.18879
CDCA8	1.06688	9.28726	7.59454	1.85504e-10	1.54562e-09	13.3515
PDRG1	1.06668	8.84555	8.02538	3.2771e-11	3.23923e-10	15.0708
RTN4RL2	1.0659	2.98271	3.95879	0.000194553	0.000517247	-0.232762
TTC9	1.06532	6.60036	4.0034	0.000167503	0.000450996	-0.089469
SNHG11	1.06499	7.33475	8.07499	2.68446e-11	2.71221e-10	15.2687
HYAL3	1.06417	6.06464	7.2637	7.01875e-10	5.1684e-09	12.0333
GPR19	1.06407	3.49673	5.97467	1.1812e-07	5.68983e-07	6.97359
SGIP1	1.06388	5.02759	4.12619	0.000110466	0.000307759	0.309766
PTGES	1.06382	8.17823	4.20078	8.55308e-05	0.000244119	0.555643
DDX27	1.06361	10.4868	7.09392	1.38786e-09	9.62265e-09	11.3585
NOS3	1.06347	8.01419	4.5285	2.71155e-05	8.48989e-05	1.66404
DNTTIP1	1.06325	9.85042	7.8005	8.098e-11	7.38569e-10	14.1733
SPRY4	1.06319	9.5231	8.22307	1.48068e-11	1.5726e-10	15.8593
RIN1	1.06305	8.36151	7.40007	4.05657e-10	3.13678e-09	12.5763
MCM4	1.06204	10.5973	8.2821	1.1682e-11	1.27029e-10	16.0946
ECE2	1.0619	7.92354	8.07475	2.68705e-11	2.71348e-10	15.2678
LOC283867	1.06188	0.713092	6.41675	2.07132e-08	1.14806e-07	8.68819
CST5	1.06171	0.606355	5.72126	3.16448e-07	1.39864e-06	6.00541
CDK2	1.06095	9.38226	13.468	3.47026e-20	3.34481e-18	35.6193
DUSP10	1.05933	7.72048	5.15034	2.7862e-06	1.03812e-05	3.87603
CHEK1	1.05932	8.16282	11.4148	5.78812e-17	2.15662e-15	28.2424
HIST1H1E	1.05831	1.71573	4.11614	0.000114321	0.000317723	0.276827
FAM188B	1.05777	7.09491	5.54966	6.12841e-07	2.57504e-06	5.35718
CCDC41	1.05636	7.72579	10.1491	7.21966e-15	1.57848e-13	23.4404
DUS4L	1.05618	6.95559	12.4223	1.42133e-18	8.45662e-17	31.9294
TTC16	1.05607	1.4624	4.17603	9.31315e-05	0.00026405	0.473778
FLJ43663	1.05566	5.74995	4.90143	7.02132e-06	2.44235e-05	2.97527
UCN	1.05469	1.52229	5.42191	9.98645e-07	4.03984e-06	4.87893
PNO1	1.0538	9.06869	9.28769	2.11518e-13	3.30225e-12	20.0809
NCAPG	1.05319	8.42526	6.34916	2.70702e-08	1.46597e-07	8.42426
POLA1	1.05307	8.8818	8.69317	2.2511e-12	2.83355e-11	17.7302
BTBD19	1.05301	3.38635	4.26967	6.74014e-05	0.0001965	0.784918
EIF3B	1.05214	12.072	11.4577	4.93155e-17	1.8749e-15	28.4017
NQO1	1.05016	11.5682	4.48968	3.11301e-05	9.62646e-05	1.53048
RIPPLY1	1.04999	0.773711	4.88199	7.54139e-06	2.60867e-05	2.90575
SLC7A6	1.0496	10.0518	8.42801	6.5061e-12	7.49132e-11	16.6759
SEC14L4	1.04903	0.898111	3.97706	0.000183004	0.000489011	-0.174202
TGS1	1.04879	9.22242	12.4634	1.22512e-18	7.46344e-17	32.0771
PRDX4	1.04704	10.833	7.05092	1.64919e-09	1.1286e-08	11.1879
MCM3APAS	1.04686	4.56269	6.66103	7.84292e-09	4.69432e-08	9.6466
ALOXE3	1.04685	1.08345	4.07925	0.000129618	0.000356709	0.15631
CFB	1.04654	10.5505	4.38433	4.51618e-05	0.000135909	1.171
RFWD3	1.04617	9.72783	12.5747	8.20068e-19	5.24486e-17	32.4762
WDR12	1.04535	9.05566	10.6488	1.05165e-15	2.78226e-14	25.3572
SDCCAG3	1.04524	9.43415	12.0263	6.01102e-18	3.04338e-16	30.4954
ATXN7L2	1.04419	6.18955	8.50343	4.8093e-12	5.6875e-11	16.976
RRP1	1.04379	9.15885	12.098	4.62338e-18	2.44005e-16	30.7564
FAM111B	1.04278	8.13743	5.95859	1.25783e-07	6.02221e-07	6.91178
LOC100272228	1.04258	4.09571	4.4826	3.19229e-05	9.84936e-05	1.50616
NPHP4	1.04102	7.83054	7.56239	2.11133e-10	1.7373e-09	13.2233
METTL11A	1.04078	8.92999	9.83167	2.48719e-14	4.79006e-13	22.2098
MKI67IP	1.04078	9.69624	13.5443	2.66122e-20	2.77241e-18	35.883
S1PR5	1.03969	3.07713	5.59685	5.11276e-07	2.18086e-06	5.53479
LRP11	1.03859	9.9396	8.74053	1.86311e-12	2.3921e-11	17.9181
CDC7	1.03853	7.07567	5.76429	2.67893e-07	1.20294e-06	6.16892
FAM84B	1.03816	10.1143	7.26074	7.10265e-10	5.22269e-09	12.0216
SUV39H1	1.03812	8.24879	10.0508	1.05805e-14	2.20749e-13	23.0601
GALK1	1.03793	8.3992	8.00665	3.53341e-11	3.47252e-10	14.9961
IL17C	1.03772	1.09261	4.12312	0.00011163	0.000310748	0.299701
GSG2	1.03769	6.15137	6.19296	5.01553e-08	2.59825e-07	7.8166
NOP16	1.03768	8.5202	9.11204	4.24348e-13	6.22826e-12	19.3886
IL1RAP	1.03712	7.13765	9.57608	6.77891e-14	1.17842e-12	21.2125
GGCT	1.03623	10.1636	9.92531	1.72513e-14	3.4352e-13	22.5738
UPK2	1.03575	0.836588	4.48241	3.19438e-05	9.85435e-05	1.50553
RCL1	1.03479	8.36335	11.6777	2.17381e-17	9.20173e-16	29.2167
KIFC3	1.03467	7.68342	5.10691	3.27761e-06	1.20461e-05	3.71752
GTPBP3	1.03335	8.3071	11.7567	1.62263e-17	7.164e-16	29.5076
ARMC10	1.03262	9.55273	12.0667	5.1832e-18	2.72151e-16	30.6427
CBWD3	1.03108	7.72462	5.36612	1.23465e-06	4.89331e-06	4.67134
HAUS7	1.02976	8.49214	8.36392	8.41272e-12	9.45855e-11	16.4206
C8orf55	1.02856	9.91778	7.25313	7.32337e-10	5.37536e-09	11.9913
RFX8	1.028	0.718936	5.20756	2.24773e-06	8.4999e-06	4.0857
DBF4B	1.02797	6.95796	8.16919	1.83845e-11	1.90913e-10	15.6445
SERPINH1	1.02722	11.5433	6.92928	2.68515e-09	1.75673e-08	10.7058
PRMT3	1.02707	8.49556	10.5198	1.7248e-15	4.33416e-14	24.8649
AKNAD1	1.02688	1.70656	3.761	0.000373908	0.000938313	-0.856217
C20orf134	1.02671	6.17691	5.57794	5.49811e-07	2.32975e-06	5.46356
C9orf68	1.02653	5.34533	3.78061	0.000350724	0.00088598	-0.795273
RACGAP1	1.0265	9.8884	10.5094	1.79546e-15	4.47642e-14	24.825
FMNL2	1.02617	9.36365	9.52593	8.25818e-14	1.41155e-12	21.0162
E2F3	1.02613	8.82161	10.8696	4.52876e-16	1.32444e-14	26.1955
LOC146880	1.02607	8.17302	6.77964	4.88545e-09	3.04766e-08	10.1142
C14orf79	1.02586	6.81026	9.35368	1.62935e-13	2.61333e-12	20.3403
ZNF598	1.02572	10.0635	11.3275	8.02758e-17	2.84873e-15	27.917
EFCAB10	1.02518	1.92836	6.40511	2.16908e-08	1.19837e-07	8.6427
PABPC1	1.02518	14.8408	11.1401	1.62478e-16	5.36084e-15	27.2154
CCDC99	1.02497	7.71396	9.7843	2.99383e-14	5.67528e-13	22.0254
EIF2S2	1.02464	11.016	9.87219	2.1228e-14	4.15454e-13	22.3674
CEBPB	1.02463	9.4478	7.56961	2.05088e-10	1.69367e-09	13.2521
KIF15	1.02461	8.003	6.89268	3.10882e-09	2.00705e-08	10.5609
FAM64A	1.02454	7.03735	4.88394	7.48769e-06	2.59378e-05	2.9127
DDX56	1.02452	10.3962	15.6693	2.20795e-23	6.29573e-21	42.9202
LTB4R	1.02452	6.31089	6.18089	5.25973e-08	2.71312e-07	7.76978
SRCRB4D	1.02445	3.62132	5.9534	1.28357e-07	6.12972e-07	6.89186
URB1	1.02428	9.65012	7.85747	6.43915e-11	5.96821e-10	14.4007
TIMM16	1.02406	7.97202	7.86824	6.16607e-11	5.73322e-10	14.4437
EIF4EBP1	1.02399	9.50062	7.33489	5.27211e-10	3.98367e-09	12.3167
IFFO2	1.02391	8.6407	5.28727	1.6644e-06	6.44839e-06	4.37927
CDH6	1.02359	5.28146	4.18816	8.93299e-05	0.000254114	0.513848
KIF11	1.02308	9.28562	6.50179	1.47805e-08	8.39167e-08	9.02108
DDX55	1.02253	8.60333	11.7398	1.72723e-17	7.58684e-16	29.4454
CPLX1	1.02248	5.99879	4.77296	1.12373e-05	3.76719e-05	2.51806
SLC9A5	1.02184	3.47291	5.27963	1.7131e-06	6.61962e-06	4.35107
CLCN5	1.02147	8.4179	6.45011	1.81463e-08	1.01677e-07	8.81868
ARHGAP11B	1.02117	5.0805	5.49119	7.6663e-07	3.16615e-06	5.13782
TXLNG	1.02117	7.72967	6.20685	4.74837e-08	2.4717e-07	7.87051
AMMECR1	1.02043	8.78356	9.9283	1.70513e-14	3.40198e-13	22.5854
SLC19A1	1.02043	8.70116	6.14717	6.006e-08	3.06572e-07	7.63913
DNMT1	1.02032	10.5409	8.12687	2.17917e-11	2.23692e-10	15.4757
SPC24	1.01996	4.63702	4.27832	6.5407e-05	0.000191205	0.81385
RFC4	1.01924	8.29037	10.5791	1.37359e-15	3.5516e-14	25.0915
ATP6V1E2	1.019	5.01134	6.61961	9.25015e-09	5.46334e-08	9.48365
LAMC2	1.01899	11.1994	5.241	1.98191e-06	7.56294e-06	4.20864
ORM2	1.01792	0.748491	4.4405	3.7054e-05	0.000113152	1.36209
PLK4	1.01756	7.67126	7.10559	1.32437e-09	9.22296e-09	11.4049
ZNF74	1.01666	7.92715	10.0481	1.06928e-14	2.22867e-13	23.0496
LOC100130015	1.01663	3.247	5.63662	4.38709e-07	1.89176e-06	5.6849
ADAMTS18	1.01659	2.15519	3.8833	0.000250156	0.000650666	-0.473028
RANGAP1	1.01612	10.9753	11.2915	9.19113e-17	3.1874e-15	27.7823
MCM3	1.01578	11.2141	11.8242	1.26411e-17	5.87563e-16	29.7559
TMEM41A	1.01572	9.20254	13.7998	1.10016e-20	1.25479e-18	36.7603
ZNF593	1.01493	8.66658	7.86503	6.2461e-11	5.79975e-10	14.4309
IARS	1.0149	11.3787	10.7607	6.85651e-16	1.90222e-14	25.7828
LRRC61	1.01468	8.44996	9.18536	3.17239e-13	4.77137e-12	19.6778
WNT8B	1.01464	0.975206	5.2543	1.88501e-06	7.22269e-06	4.25762
PASK	1.01421	7.74285	7.887	5.7177e-11	5.36737e-10	14.5185
STAG3L1	1.01419	5.9808	4.5004	2.99675e-05	9.29382e-05	1.56729
MTAP	1.01408	9.31403	11.6702	2.23576e-17	9.38728e-16	29.1887
LOC399815	1.01343	2.90545	4.38294	4.53838e-05	0.000136537	1.16627
OAS3	1.01327	10.5173	5.08284	3.58562e-06	1.30907e-05	3.62992
CEP250	1.01263	9.42221	5.92148	1.45387e-07	6.88532e-07	6.76938
FOXRED2	1.01182	8.43075	7.28774	6.37247e-10	4.72811e-09	12.129
KIF20B	1.01179	8.42745	7.15089	1.10421e-09	7.83599e-09	11.5848
LRRC46	1.01118	2.56797	4.67136	1.62431e-05	5.29656e-05	2.16047
DPY19L1	1.01079	9.7709	9.54762	7.58228e-14	1.307e-12	21.1011
CXCL16	1.01052	10.4163	7.05439	1.62638e-09	1.11367e-08	11.2016
CXorf50B	1.00861	2.19049	4.72683	1.32887e-05	4.40523e-05	2.35526
PPA1	1.00856	12.0655	8.95602	7.89013e-13	1.09154e-11	18.7721
WDR3	1.00789	9.56215	10.9681	3.11506e-16	9.5451e-15	26.5678
LOC285419	1.00769	2.86812	4.30634	5.93317e-05	0.000174836	0.907785
ADAMTS7	1.00768	6.75157	4.19263	8.79647e-05	0.000250543	0.528657
SNHG6	1.00721	9.64642	6.35369	2.659e-08	1.44264e-07	8.44191
CLPB	1.00693	8.00942	9.61871	5.73251e-14	1.01807e-12	21.3793
TM4SF1	1.0063	10.9479	5.89086	1.6382e-07	7.68384e-07	6.65205
PTCD1	1.00513	8.96389	13.4011	4.38234e-20	4.08952e-18	35.3875
NOM1	1.00497	8.95647	12.3292	1.99123e-18	1.1419e-16	31.5941
GPR172A	1.00468	10.8097	7.4223	3.70959e-10	2.89134e-09	12.6648
CD46	1.00466	12.7797	8.34866	8.94387e-12	9.98464e-11	16.3598
ZMIZ2	1.00335	11.2721	9.31723	1.88194e-13	2.95836e-12	20.197
SUV39H2	1.00323	7.65937	11.2845	9.43373e-17	3.26601e-15	27.7564
PRPS1	1.002	9.36836	8.17979	1.76177e-11	1.83693e-10	15.6868
FOXP4	1.00165	11.0424	8.35977	8.55392e-12	9.59545e-11	16.4041
SCARNA12	1.00141	2.3799	5.44043	9.30567e-07	3.77934e-06	4.94805
FZD3	1.0006	6.44443	4.32223	5.61332e-05	0.000166462	0.961205
NSUN5	1.00003	9.36531	13.3601	5.05681e-20	4.61405e-18	35.2453
CA1	-9.25241	9.41417	-12.6985	5.25906e-19	3.57511e-17	32.9179
OTOP2	-8.72576	5.46436	-26.5383	7.57273e-36	7.77341e-32	71.0093
AQP8	-8.4509	8.66272	-11.9882	6.91312e-18	3.43778e-16	30.3563
CLCA4	-7.98189	9.59397	-12.0332	5.86182e-18	3.00048e-16	30.5204
MS4A12	-7.73592	8.42204	-12.0431	5.65132e-18	2.91512e-16	30.5567
TMIGD1	-7.72142	6.73173	-15.0471	1.6618e-22	3.37791e-20	40.9203
CA4	-7.65188	8.6767	-11.6174	2.71918e-17	1.10984e-15	28.994
ZG16	-7.62968	10.3523	-10.2045	5.82526e-15	1.30275e-13	23.6539
PYY	-7.61896	6.74621	-14.1621	3.18894e-21	4.39388e-19	37.9897
GUCA2B	-7.54818	6.7028	-14.8632	3.0452e-22	5.43635e-20	40.3198
CA7	-7.43307	7.20408	-22.294	1.52648e-31	6.26774e-28	61.4042
GCG	-6.77881	6.45408	-12.3965	1.56042e-18	9.17923e-17	31.8366
SLC26A3	-6.67127	12.3449	-9.46408	1.05373e-13	1.75783e-12	20.7738
CD177	-6.62605	9.47286	-10.6698	9.70699e-16	2.59823e-14	25.4369
CHGA	-6.51392	9.05506	-10.5971	1.28203e-15	3.33166e-14	25.1601
BEST4	-6.50555	6.87838	-23.205	1.61159e-32	8.2715e-29	63.594
CLDN8	-6.37504	6.37539	-9.68152	4.47929e-14	8.14525e-13	21.6246
GUCA2A	-6.35339	9.71612	-13.38	4.71674e-20	4.32298e-18	35.3144
SLC6A19	-6.17501	5.61836	-10.3264	3.63453e-15	8.51792e-14	24.1233
PLP1	-6.06943	6.05678	-15.081	1.48677e-22	3.08318e-20	41.0306
SLC4A4	-5.99512	9.29243	-13.0446	1.53373e-19	1.21573e-17	34.1428
SCGN	-5.98375	5.38769	-17.8734	2.52086e-26	2.07013e-23	49.6165
SST	-5.95046	5.05679	-15.7271	1.83499e-23	5.45976e-21	43.1034
BMP3	-5.82713	7.11053	-13.6465	1.86678e-20	2.01711e-18	36.2352
CEACAM7	-5.72434	12.3775	-11.9903	6.85876e-18	3.4344e-16	30.3641
CA2	-5.69882	11.7	-15.1892	1.04341e-22	2.25487e-20	41.3816
CWH43	-5.64249	6.67718	-11.1656	1.47597e-16	4.90318e-15	27.311
ADH1B	-5.59944	8.98339	-11.3523	7.31638e-17	2.62069e-15	28.0093
CDKN2BAS	-5.57395	6.42644	-12.6232	6.88988e-19	4.49045e-17	32.6494
MYOC	-5.54355	4.10454	-14.2176	2.64216e-21	3.71531e-19	38.1764
ADH1C	-5.50316	10.0012	-10.1388	7.51422e-15	1.63073e-13	23.4006
ATP1A2	-5.48837	6.51459	-10.426	2.47473e-15	5.99838e-14	24.5057
INSL5	-5.48007	4.63713	-7.50295	2.68174e-10	2.15147e-09	12.9863
SCNN1B	-5.47103	8.39269	-10.9957	2.80556e-16	8.67441e-15	26.6719
KRT24	-5.4043	3.21452	-13.2534	7.3488e-20	6.33911e-18	34.8739
ABCA8	-5.37723	6.96268	-13.915	7.40625e-21	8.84013e-19	37.1532
PCSK2	-5.34378	4.05984	-16.5337	1.4468e-24	6.75066e-22	45.6171
MT1M	-5.3408	7.20748	-11.9209	8.85142e-18	4.28584e-16	30.1104
MAMDC2	-5.34069	6.46831	-14.2881	2.08105e-21	2.96694e-19	38.4133
SPIB	-5.3399	6.95797	-13.9531	6.50021e-21	7.95836e-19	37.2828
B4GALNT2	-5.33111	6.34859	-8.83712	1.26714e-12	1.68269e-11	18.3012
SCN7A	-5.28796	5.69595	-11.3892	6.37088e-17	2.34398e-15	28.1469
PRIMA1	-5.28506	5.91142	-13.2408	7.68041e-20	6.56995e-18	34.83
SCARA5	-5.27686	8.15416	-13.3276	5.66613e-20	5.05764e-18	35.1322
CADM3	-5.27573	6.81381	-13.5312	2.78465e-20	2.84595e-18	35.838
BEST2	-5.26175	6.401	-9.75021	3.42154e-14	6.40914e-13	21.8926
SLC30A10	-5.25526	4.85135	-12.0563	5.38508e-18	2.7944e-16	30.6047
GPM6A	-5.217	5.32527	-10.1951	6.04003e-15	1.34492e-13	23.6179
TMEM72	-5.20096	4.16593	-17.0023	3.42667e-25	1.90134e-22	47.0407
CHP2	-5.18107	9.98412	-9.1926	3.08265e-13	4.64661e-12	19.7064
CLCA1	-5.17582	12.0215	-6.39853	2.22641e-08	1.22545e-07	8.61698
PI16	-5.16426	6.30005	-13.0697	1.40391e-19	1.13029e-17	34.2307
KIAA0408	-5.16219	3.86727	-10.3605	3.18567e-15	7.5207e-14	24.2544
UGT2A3	-5.13901	8.4436	-10.6998	8.65262e-16	2.3457e-14	25.5513
C11orf86	-5.06492	6.42081	-10.944	3.41293e-16	1.03338e-14	26.477
CNTFR	-5.03761	5.19697	-11.9478	8.01764e-18	3.90979e-16	30.2088
FAM55D	-5.01963	9.35236	-9.06472	5.12089e-13	7.35702e-12	19.2018
NRXN1	-5.00744	4.73486	-13.2595	7.19435e-20	6.23207e-18	34.895
UGT1A8	-4.98387	6.75227	-13.567	2.45897e-20	2.57564e-18	35.9615
OGN	-4.96309	7.44041	-10.6608	1.00452e-15	2.67133e-14	25.4028
DPP6	-4.95972	4.26265	-9.81518	2.65293e-14	5.07592e-13	22.1457
TRPM6	-4.86152	8.03514	-10.5071	1.81164e-15	4.50824e-14	24.816
CASQ2	-4.86092	6.11626	-8.51378	4.61402e-12	5.466e-11	17.0172
RERGL	-4.85942	4.10337	-13.9102	7.52859e-21	8.93422e-19	37.1369
SFRP1	-4.84141	7.78127	-10.3604	3.18705e-15	7.5207e-14	24.254
ALPI	-4.82941	6.52746	-12.6422	6.43402e-19	4.24728e-17	32.7175
VSTM2A	-4.76674	3.9818	-15.5044	3.75229e-23	9.75121e-21	42.395
AKR1B10	-4.76632	8.79568	-10.7341	7.589e-16	2.0746e-14	25.6818
C2orf40	-4.75884	4.43814	-13.4358	3.88206e-20	3.68976e-18	35.5079
DHRS9	-4.75551	8.93409	-10.779	6.39593e-16	1.80581e-14	25.852
ANGPTL1	-4.74899	6.57727	-11.0712	2.10812e-16	6.76244e-15	26.9563
IGJ	-4.69809	13.6881	-9.27707	2.20604e-13	3.43106e-12	20.039
PCOLCE2	-4.69683	5.55218	-11.3914	6.31964e-17	2.33349e-15	28.155
GBA3	-4.68945	5.23615	-10.9597	3.21585e-16	9.78094e-15	26.5361
WISP2	-4.67654	5.44488	-11.5145	3.9885e-17	1.5479e-15	28.6129
VSIG2	-4.66941	9.44611	-8.70561	2.14195e-12	2.71512e-11	17.7795
OSTBETA	-4.6557	7.12554	-12.1005	4.5803e-18	2.42354e-16	30.7657
NBLA00301	-4.65548	5.54266	-8.93102	8.71598e-13	1.19852e-11	18.6731
SEMA3E	-4.60786	4.51207	-12.065	5.21664e-18	2.73208e-16	30.6363
LGI1	-4.59858	3.11293	-18.0333	1.57573e-26	1.40651e-23	50.0798
PRPH	-4.59602	5.66876	-12.7548	4.2998e-19	2.96224e-17	33.1181
NPTX1	-4.5836	5.89815	-8.10324	2.39632e-11	2.44394e-10	15.3814
DAO	-4.56928	2.99935	-15.5747	2.99137e-23	8.08063e-21	42.6195
ABCG2	-4.55927	7.4517	-12.3021	2.19707e-18	1.24602e-16	31.4963
SOX10	-4.5542	4.83823	-11.3587	7.14232e-17	2.5861e-15	28.0332
FXYD1	-4.54938	5.31912	-12.9635	2.04468e-19	1.5605e-17	33.857
C16orf89	-4.52806	5.38392	-11.7759	1.51145e-17	6.78996e-16	29.5782
FIGF	-4.52038	3.97528	-12.951	2.13765e-19	1.61941e-17	33.8128
MYH11	-4.51754	13.6011	-8.39541	7.41473e-12	8.42882e-11	16.546
SLC26A2	-4.50091	12.2984	-11.6897	2.07938e-17	8.93088e-16	29.2609
ITLN1	-4.50014	10.315	-6.22699	4.38607e-08	2.29534e-07	7.94869
SFRP5	-4.49005	3.49959	-11.8923	9.83618e-18	4.70715e-16	30.0055
DES	-4.48376	12.2361	-7.10824	1.31036e-09	9.14093e-09	11.4154
PKIB	-4.48038	8.84608	-15.9125	1.01629e-23	3.42039e-21	43.6885
ANGPTL7	-4.47098	3.74918	-11.6201	2.69248e-17	1.10113e-15	29.0038
RSPO2	-4.46834	5.13359	-13.8261	1.00495e-20	1.15908e-18	36.8502
CNR1	-4.46553	5.17862	-12.48	1.15389e-18	7.0722e-17	32.1367
FAM135B	-4.44768	3.38443	-19.6401	1.63734e-28	2.24098e-25	54.5738
FMN2	-4.44022	4.24865	-10.6569	1.01958e-15	2.70789e-14	25.388
BCHE	-4.43267	5.94089	-11.3273	8.03418e-17	2.84873e-15	27.9161
GPT	-4.43081	8.02344	-12.7975	3.69052e-19	2.57709e-17	33.27
HSD3B2	-4.42909	3.77904	-7.718	1.12868e-10	9.91507e-10	13.8441
NEFL	-4.38393	4.5239	-12.338	1.92884e-18	1.10922e-16	31.6258
KIF1A	-4.36974	4.76311	-10.8998	4.03702e-16	1.19596e-14	26.3099
SLC9A3	-4.36236	8.48822	-6.46358	1.72016e-08	9.68063e-08	8.87141
LYVE1	-4.35787	7.80686	-13.2297	7.9864e-20	6.80335e-18	34.7912
PDE6A	-4.34643	5.14492	-12.8799	2.75156e-19	2.02471e-17	33.5619
FEV	-4.34002	3.32472	-16.6086	1.14704e-24	5.88718e-22	45.8467
C7	-4.33722	8.80304	-9.18795	3.13994e-13	4.72949e-12	19.688
LONRF2	-4.29878	4.78688	-9.39318	1.39395e-13	2.25871e-12	20.4955
SULT1A2	-4.2909	6.19861	-15.4635	4.28211e-23	1.07209e-20	42.2641
MYOT	-4.28691	3.40053	-14.1537	3.28069e-21	4.49017e-19	37.9615
MT1H	-4.27673	6.64761	-9.04089	5.62946e-13	7.99719e-12	19.1076
SI	-4.27252	8.06233	-5.87388	1.75021e-07	8.15152e-07	6.58705
ANO5	-4.26378	6.00806	-14.1246	3.62262e-21	4.92532e-19	37.8631
ANPEP	-4.26088	11.3211	-10.4299	2.43767e-15	5.92254e-14	24.5207
HMP19	-4.25618	4.54813	-12.9528	2.12349e-19	1.61464e-17	33.8194
SYNM	-4.23648	10.3276	-7.53666	2.34162e-10	1.90239e-09	13.1207
FABP1	-4.22755	13.2363	-8.57568	3.60123e-12	4.35927e-11	17.2634
DPT	-4.22109	8.88988	-9.63104	5.4614e-14	9.76677e-13	21.4274
HBA1	-4.21984	6.22377	-7.13898	1.15828e-09	8.18853e-09	11.5375
SCNN1G	-4.21452	4.33604	-7.67134	1.36185e-10	1.17573e-09	13.6579
C6orf105	-4.20774	8.58457	-10.6996	8.6607e-16	2.3457e-14	25.5504
LOC646627	-4.20523	8.53313	-8.64577	2.72073e-12	3.36891e-11	17.5419
LOC572558	-4.20519	3.0312	-10.222	5.44206e-15	1.22641e-13	23.7216
STMN2	-4.19651	7.04179	-11.6696	2.24051e-17	9.38728e-16	29.1866
HRNBP3	-4.19387	4.50151	-6.84176	3.81134e-09	2.42175e-08	10.3595
GLP2R	-4.17765	4.08358	-19.2719	4.55154e-28	5.19128e-25	53.5692
GREM2	-4.16292	7.95202	-10.7577	6.9367e-16	1.91928e-14	25.7712
ASB5	-4.16154	3.24915	-7.49691	2.74774e-10	2.19926e-09	12.9622
ADIPOQ	-4.16038	4.26606	-5.39113	1.12271e-06	4.48342e-06	4.76433
CDH19	-4.1584	4.2089	-9.87681	2.08483e-14	4.08802e-13	22.3854
PPP1R1A	-4.15132	4.31232	-7.8796	5.89048e-11	5.5069e-10	14.489
PLIN4	-4.15069	7.35266	-6.47077	1.67175e-08	9.42369e-08	8.89958
CLEC3B	-4.1474	8.61919	-18.57	3.32468e-27	3.25027e-24	51.6128
SCG3	-4.14492	4.08929	-16.5057	1.57781e-24	7.19834e-22	45.5314
TMEM35	-4.13307	6.10239	-9.22846	2.67426e-13	4.08198e-12	19.8477
PHOX2B	-4.12927	3.26585	-12.5529	8.86955e-19	5.63752e-17	32.3983
PIRT	-4.12504	4.55123	-11.607	2.82721e-17	1.14483e-15	28.9552
OTOP3	-4.11923	2.18514	-16.5895	1.21717e-24	5.96643e-22	45.788
SLC25A34	-4.11611	6.09017	-15.4202	4.92556e-23	1.20383e-20	42.1254
SORCS1	-4.11308	4.85417	-11.1872	1.36052e-16	4.55651e-15	27.3921
CNTN2	-4.10922	3.74298	-11.7941	1.41307e-17	6.43243e-16	29.6451
TCEAL2	-4.09566	4.35998	-8.64674	2.71014e-12	3.35783e-11	17.5458
UGT1A10	-4.0921	8.97607	-12.6289	6.7496e-19	4.41304e-17	32.6698
AMPD1	-4.08206	4.02236	-11.5291	3.7782e-17	1.48595e-15	28.6668
SLC4A10	-4.07291	4.0708	-11.7303	1.78897e-17	7.78125e-16	29.4105
PDZRN4	-4.07073	5.45777	-8.03901	3.10226e-11	3.07529e-10	15.1252
SH2D7	-4.06943	3.64485	-14.1	3.93874e-21	5.18348e-19	37.7801
MAL	-4.06807	4.61103	-12.0305	5.91997e-18	3.00834e-16	30.5105
GCNT2	-4.05167	6.75768	-19.8604	8.94127e-29	1.41203e-25	55.1678
KRTAP13-2	-4.05007	2.73081	-9.1692	3.3824e-13	5.05759e-12	19.6141
NR1H4	-4.04891	4.38392	-7.94148	4.59226e-11	4.3912e-10	14.736
NPY6R	-4.04766	3.92752	-11.7746	1.51874e-17	6.80782e-16	29.5734
GPR15	-4.04373	4.95054	-10.818	5.51117e-16	1.57583e-14	26.0001
PKHD1L1	-4.0412	4.00896	-14.5493	8.65005e-22	1.37663e-19	39.2844
FAM5C	-4.03512	5.16651	-7.46178	3.16491e-10	2.50002e-09	12.8221
PYGM	-4.0245	5.56581	-9.78774	2.95381e-14	5.60979e-13	22.0388
MAPK4	-4.01292	4.22531	-9.31267	1.91618e-13	3.00758e-12	20.1791
SLC17A8	-4.00709	2.63494	-17.8529	2.67778e-26	2.11442e-23	49.5569
CHRM2	-4.00152	3.85107	-7.23884	7.75604e-10	5.65051e-09	11.9344
AGTR1	-3.98648	4.8388	-8.86826	1.11922e-12	1.50476e-11	18.4246
SLC7A14	-3.9827	3.10606	-11.6256	2.6377e-17	1.08521e-15	29.0243
B3GALT1	-3.97355	4.34535	-14.2904	2.06544e-21	2.96528e-19	38.4208
HAND1	-3.95275	4.58936	-5.3139	1.50494e-06	5.87494e-06	4.47773
ASPG	-3.95128	4.52939	-6.65876	7.91414e-09	4.73556e-08	9.63767
CCBE1	-3.94398	4.77357	-9.5816	6.63321e-14	1.15701e-12	21.2341
ABCC13	-3.93891	5.0619	-11.9353	8.39666e-18	4.07526e-16	30.1629
MORN5	-3.93639	2.71774	-6.53315	1.30488e-08	7.50818e-08	9.14404
TAGLN3	-3.93558	3.35949	-10.5374	1.61217e-15	4.08616e-14	24.9321
TMEM82	-3.93452	5.92937	-11.735	1.75794e-17	7.69519e-16	29.4279
LDB3	-3.929	6.10296	-8.73206	1.92718e-12	2.46665e-11	17.8845
HAND2	-3.92856	6.59386	-7.53875	2.32204e-10	1.88798e-09	13.129
HTR4	-3.91961	4.29813	-13.0654	1.42533e-19	1.1386e-17	34.2156
NPY2R	-3.91354	2.81751	-14.9786	2.08087e-22	3.99254e-20	40.6974
VIP	-3.9126	8.08369	-9.99466	1.3164e-14	2.69448e-13	22.8428
CADM2	-3.90879	2.80101	-12.6813	5.59387e-19	3.75301e-17	32.8566
ADH1A	-3.89954	3.46629	-17.0594	2.88086e-25	1.68983e-22	47.2121
GFRA3	-3.89943	4.90821	-9.68063	4.49498e-14	8.16655e-13	21.6211
TNXB	-3.89869	9.5537	-10.1737	6.56274e-15	1.44719e-13	23.5353
LMO3	-3.89313	6.76059	-7.24553	7.55023e-10	5.51427e-09	11.9611
CMA1	-3.87872	3.3435	-12.026	6.01857e-18	3.04338e-16	30.4941
KIAA2022	-3.8749	3.89017	-13.5191	2.90396e-20	2.93686e-18	35.7963
USP2	-3.87388	6.90096	-14.1895	2.90615e-21	4.05872e-19	38.0819
FAM151A	-3.87308	3.86285	-11.266	1.0116e-16	3.46135e-15	27.6869
FAM189A1	-3.8663	6.19838	-10.1893	6.17852e-15	1.37107e-13	23.5953
PMP2	-3.85718	2.97001	-15.0402	1.69979e-22	3.38804e-20	40.8979
PTGDR	-3.85481	5.86522	-12.2231	2.92876e-18	1.62506e-16	31.2105
HMGCS2	-3.85145	11.7741	-8.30109	1.08248e-11	1.18462e-10	16.1703
NEUROD1	-3.84819	3.29449	-10.7825	6.30934e-16	1.79018e-14	25.8656
CTSG	-3.84726	5.37883	-9.86862	2.15268e-14	4.19304e-13	22.3535
SCN9A	-3.84559	6.67378	-15.0273	1.77341e-22	3.46744e-20	40.8559
EPHA7	-3.84425	6.32855	-7.99942	3.63773e-11	3.5631e-10	14.9672
NGB	-3.84023	2.63405	-10.8153	5.56868e-16	1.59006e-14	25.9898
RXRG	-3.83066	3.20364	-16.3975	2.20918e-24	9.64987e-22	45.1985
ABCB11	-3.82623	3.09746	-10.3415	3.42903e-15	8.06236e-14	24.1812
CHGB	-3.82502	6.38681	-8.8979	9.94515e-13	1.34857e-11	18.542
UGT1A9	-3.82226	4.46777	-9.3324	1.77233e-13	2.80972e-12	20.2567
GDPD2	-3.81765	6.19524	-10.141	7.45063e-15	1.62035e-13	23.4091
UGT1A1	-3.81034	4.69966	-7.77481	8.98012e-11	8.07896e-10	14.0708
LGALS2	-3.81011	7.44176	-7.64657	1.50462e-10	1.28445e-09	13.5591
NLGN1	-3.80876	3.15587	-12.3908	1.59253e-18	9.31474e-17	31.8163
ASPA	-3.8087	3.79569	-14.8732	2.94596e-22	5.35226e-20	40.3527
TPH1	-3.80782	3.76402	-9.8307	2.49668e-14	4.80382e-13	22.2061
FAM23A	-3.80469	8.65576	-10.7677	6.6757e-16	1.86465e-14	25.8094
FABP4	-3.80347	6.10087	-7.01782	1.88322e-09	1.27389e-08	11.0566
HSD17B2	-3.8026	9.13801	-9.49875	9.19123e-14	1.54923e-12	20.9097
PLAC9	-3.79656	5.58651	-13.067	1.41733e-19	1.13664e-17	34.2212
C1orf95	-3.79011	5.06391	-8.42596	6.55982e-12	7.54471e-11	16.6677
LRRN2	-3.78856	7.31996	-11.6833	2.12926e-17	9.12603e-16	29.2373
MEP1B	-3.78711	4.59331	-6.73287	5.88869e-09	3.61852e-08	9.92965
BEX1	-3.77763	3.51013	-13.1338	1.11946e-19	9.22996e-18	34.4557
CCL23	-3.77741	3.77477	-13.4809	3.31765e-20	3.24569e-18	35.664
RIMS4	-3.77442	3.86603	-10.5674	1.43693e-15	3.69676e-14	25.0466
CNTN1	-3.77415	4.68029	-10.6256	1.14939e-15	3.0175e-14	25.2688
PSD	-3.77006	7.32393	-7.3699	4.57982e-10	3.50573e-09	12.4561
C2orf88	-3.76634	9.02581	-15.4944	3.87477e-23	9.82087e-21	42.3632
CNTN3	-3.76161	5.48177	-12.7863	3.84224e-19	2.67394e-17	33.23
DNASE1L3	-3.75314	6.87218	-8.20006	1.62403e-11	1.70632e-10	15.7676
NAP1L2	-3.75249	4.77397	-14.9641	2.18287e-22	4.14948e-20	40.6499
GP2	-3.75043	4.67212	-7.63808	1.55689e-10	1.32352e-09	13.5252
EDN3	-3.75008	8.18013	-10.9642	3.16122e-16	9.6577e-15	26.5532
TMEM100	-3.74858	5.97909	-13.675	1.69154e-20	1.85707e-18	36.3331
PTPRZ1	-3.71915	3.94569	-8.02492	3.2831e-11	3.2436e-10	15.069
HTR3E	-3.69979	2.4116	-12.6347	6.61031e-19	4.33577e-17	32.6906
NOVA1	-3.69912	4.81704	-11.6472	2.43451e-17	1.01175e-15	29.104
HBB	-3.69846	9.06187	-10.5784	1.37744e-15	3.55709e-14	25.0887
MT1E	-3.69462	9.91052	-9.59296	6.34331e-14	1.11497e-12	21.2786
TNFRSF17	-3.69239	5.87468	-8.85629	1.1739e-12	1.56855e-11	18.3772
PLAC8	-3.69077	10.3378	-9.2762	2.21361e-13	3.43763e-12	20.0356
TEX11	-3.6892	3.53726	-14.322	1.85592e-21	2.68634e-19	38.5269
SLC17A4	-3.68857	7.38249	-10.2983	4.05121e-15	9.37671e-14	24.0153
MT1G	-3.68693	10.2325	-8.93025	8.74264e-13	1.20138e-11	18.6701
MYOM1	-3.68567	6.24861	-10.2452	4.97426e-15	1.12717e-13	23.811
CNN1	-3.68395	11.0806	-7.14913	1.11202e-09	7.88594e-09	11.5778
ADCY5	-3.68318	6.58298	-10.9436	3.41776e-16	1.03338e-14	26.4756
TACR2	-3.68185	7.00552	-6.86443	3.48096e-09	2.22422e-08	10.4492
PADI2	-3.67919	11.2449	-12.7012	5.20753e-19	3.55185e-17	32.9277
HSPB6	-3.67878	9.36451	-8.17081	1.82648e-11	1.89861e-10	15.6509
PNCK	-3.67522	5.17647	-5.76674	2.65362e-07	1.1921e-06	6.17824
C21orf88	-3.67142	4.74544	-6.59376	1.0253e-08	6.00209e-08	9.38204
ACTG2	-3.66848	12.251	-6.77215	5.03379e-09	3.13257e-08	10.0846
OSTalpha	-3.66374	6.11643	-6.75697	5.34854e-09	3.31039e-08	10.0247
DNER	-3.66068	3.99691	-10.8853	4.26547e-16	1.25639e-14	26.2551
SYNPO2	-3.65745	11.0481	-7.99375	3.72164e-11	3.63133e-10	14.9446
DPP10	-3.65376	5.02107	-6.94276	2.54405e-09	1.67455e-08	10.7591
ABI3BP	-3.65264	8.19196	-10.7391	7.44655e-16	2.04109e-14	25.7007
FABP2	-3.64571	8.09682	-7.97952	3.94079e-11	3.81985e-10	14.8878
MOGAT2	-3.63783	7.462	-8.29122	1.1262e-11	1.22984e-10	16.131
ZBTB16	-3.63628	4.32673	-9.05557	5.31055e-13	7.6082e-12	19.1656
PRKG2	-3.63341	4.98819	-14.7229	4.84881e-22	8.2955e-20	39.8585
SLC13A2	-3.63151	7.21475	-6.52583	1.34338e-08	7.71675e-08	9.11534
SLCO4C1	-3.63018	4.01747	-11.2951	9.06512e-17	3.15435e-15	27.796
SLC5A7	-3.61667	2.77318	-9.79043	2.92286e-14	5.55615e-13	22.0493
SCN2B	-3.61573	4.27598	-9.59213	6.364e-14	1.11669e-12	21.2753
CHRDL1	-3.60173	8.61963	-8.29661	1.10211e-11	1.20545e-10	16.1525
SLITRK3	-3.59833	3.69061	-9.6364	5.34755e-14	9.60501e-13	21.4484
CMTM5	-3.59135	2.40733	-11.9881	6.91576e-18	3.43778e-16	30.3559
SYT4	-3.5614	3.41908	-10.6307	1.12706e-15	2.96268e-14	25.2883
BMX	-3.56084	5.18607	-16.2479	3.52699e-24	1.44818e-21	44.7358
SCRG1	-3.55918	3.62855	-6.59321	1.02754e-08	6.01182e-08	9.37987
PIGR	-3.54705	15.5377	-6.16466	5.60665e-08	2.87977e-07	7.70688
MUSK	-3.54321	2.88553	-16.0565	6.4404e-24	2.3611e-21	44.1399
ASTN1	-3.52234	2.91468	-11.7968	1.39895e-17	6.39654e-16	29.6551
CP	-3.51638	6.61	-10.0176	1.20391e-14	2.48711e-13	22.9317
TMEFF2	-3.50857	2.28896	-14.176	3.04172e-21	4.21935e-19	38.0366
B3GNT7	-3.50501	10.7215	-7.61353	1.71856e-10	1.4448e-09	13.4273
CILP	-3.50295	7.64695	-7.58273	1.94538e-10	1.61368e-09	13.3044
GAP43	-3.49853	4.87016	-9.45638	1.08621e-13	1.80566e-12	20.7436
FAM55A	-3.49485	8.43568	-7.73261	1.06425e-10	9.40906e-10	13.9024
SCGB2A1	-3.49376	4.32316	-8.55641	3.89003e-12	4.67363e-11	17.1867
P2RX2	-3.4905	2.20374	-13.9958	5.61778e-21	7.0325e-19	37.4276
GRIK3	-3.48499	5.33468	-11.31	8.5725e-17	3.00844e-15	27.8516
MMP28	-3.48298	8.30394	-11.4257	5.55865e-17	2.09186e-15	28.2826
BTNL8	-3.48291	8.49267	-8.84946	1.20631e-12	1.60712e-11	18.3501
LOC643763	-3.48112	2.89435	-10.9	4.03404e-16	1.19596e-14	26.3106
LDHD	-3.47996	8.56177	-12.1429	3.92338e-18	2.11409e-16	30.9197
ABCA9	-3.47887	4.9982	-9.68805	4.36606e-14	7.96757e-13	21.6501
SPEG	-3.4757	7.43243	-7.35027	4.95601e-10	3.7684e-09	12.3779
SH2D6	-3.47248	3.22784	-8.92894	8.7884e-13	1.20606e-11	18.6649
GFRA2	-3.47233	5.43005	-14.0056	5.43308e-21	6.9105e-19	37.4608
PRKAA2	-3.4715	5.93999	-8.91467	9.3024e-13	1.27065e-11	18.6084
CRYBA2	-3.46591	3.00646	-12.2236	2.92281e-18	1.62506e-16	31.2125
SPOCK3	-3.45821	2.4294	-9.67335	4.6254e-14	8.38865e-13	21.5927
LMOD1	-3.44906	10.2938	-8.43661	6.28559e-12	7.26185e-11	16.7101
PTCHD1	-3.44864	3.84003	-7.99686	3.67535e-11	3.59138e-10	14.957
HIF3A	-3.44614	5.6743	-9.94672	1.5869e-14	3.18776e-13	22.6569
MMRN1	-3.44212	7.60023	-10.4706	2.0844e-15	5.15575e-14	24.6765
DMRTA1	-3.44133	3.47927	-13.3013	6.21216e-20	5.47363e-18	35.0408
MADCAM1	-3.43962	5.07291	-10.3837	2.9136e-15	6.92757e-14	24.3432
HPGDS	-3.43587	5.10601	-13.3513	5.21465e-20	4.69548e-18	35.2147
LOC389332	-3.43573	6.10679	-8.4963	4.94861e-12	5.8374e-11	16.9476
MASP1	-3.43183	7.10006	-6.97992	2.19218e-09	1.45743e-08	10.9063
UGT2B15	-3.42968	8.22197	-5.1095	3.24604e-06	1.19386e-05	3.72697
BAI3	-3.42943	3.48612	-11.6697	2.23976e-17	9.38728e-16	29.1869
HRASLS2	-3.42655	5.19439	-9.65128	5.04405e-14	9.09169e-13	21.5065
FCGBP	-3.42545	14.3592	-5.8368	2.02177e-07	9.31692e-07	6.44533
RBPMS2	-3.42138	6.74765	-8.2474	1.34281e-11	1.43958e-10	15.9563
FAM107A	-3.42048	7.46532	-13.6283	1.9883e-20	2.13716e-18	36.1725
CFD	-3.41914	9.51395	-13.391	4.53875e-20	4.19733e-18	35.3527
TNFRSF13B	-3.41708	3.99095	-9.81764	2.62755e-14	5.03206e-13	22.1552
ELAVL4	-3.40949	3.09176	-11.7394	1.72949e-17	7.58684e-16	29.4441
WSCD1	-3.40058	7.88035	-12.0766	4.99911e-18	2.63158e-16	30.6787
PDZD4	-3.39967	5.81865	-11.5067	4.10709e-17	1.58792e-15	28.5837
SGCG	-3.39877	2.40428	-15.3289	6.62226e-23	1.54494e-20	41.8322
PLCXD3	-3.39804	3.58659	-10.3809	2.94502e-15	6.98975e-14	24.3326
B3GNT6	-3.39591	8.00676	-5.20143	2.30015e-06	8.68531e-06	4.06319
SGCA	-3.38853	5.45537	-8.45919	5.74178e-12	6.67868e-11	16.8
STMN4	-3.38534	2.3733	-12.8304	3.28233e-19	2.32367e-17	33.3865
GNAO1	-3.38497	7.43571	-8.87881	1.07313e-12	1.44468e-11	18.4664
NPY	-3.38398	2.41824	-12.6903	5.41537e-19	3.65715e-17	32.8888
CTNND2	-3.38323	3.40737	-14.0295	5.00694e-21	6.42453e-19	37.5419
CHODL	-3.3806	4.36494	-9.40062	1.35357e-13	2.20022e-12	20.5248
PCSK1N	-3.37824	5.05513	-7.41955	3.75082e-10	2.91904e-09	12.6539
FAM180B	-3.37808	2.28562	-15.8301	1.32053e-23	4.23602e-21	43.4292
CBLN2	-3.36863	3.92516	-14.6691	5.79816e-22	9.75706e-20	39.6812
CPEB1	-3.36389	3.39573	-10.2166	5.55776e-15	1.24837e-13	23.7007
GFRA1	-3.36218	7.04891	-9.45051	1.11167e-13	1.83905e-12	20.7206
LRRC19	-3.36217	9.61469	-10.6817	9.27244e-16	2.50144e-14	25.4825
INA	-3.36024	4.13934	-10.2905	4.17579e-15	9.61087e-14	23.9851
KCNB1	-3.35755	3.02237	-8.76223	1.70847e-12	2.21433e-11	18.0042
GALNTL1	-3.35635	5.03269	-9.55331	7.41428e-14	1.28019e-12	21.1234
PGM5	-3.35393	9.28369	-8.11704	2.26701e-11	2.32244e-10	15.4365
ANK2	-3.35064	7.65818	-10.5215	1.71396e-15	4.31221e-14	24.8712
EYA2	-3.3496	6.65199	-8.72736	1.96367e-12	2.50554e-11	17.8659
RETNLB	-3.34401	6.83498	-5.58709	5.3081e-07	2.25669e-06	5.49803
ADAMDEC1	-3.34032	10.4875	-9.83652	2.44046e-14	4.70889e-13	22.2287
BTNL3	-3.34029	8.50033	-8.19534	1.65509e-11	1.73539e-10	15.7488
HPGD	-3.33806	10.2478	-13.208	8.61935e-20	7.28211e-18	34.7154
ENPP6	-3.33624	3.87635	-15.988	7.99869e-24	2.83126e-21	43.9255
CNGA3	-3.32934	4.13576	-7.07783	1.48041e-09	1.0202e-08	11.2947
TMEM59L	-3.32122	4.13339	-10.1929	6.09226e-15	1.35508e-13	23.6093
GNG13	-3.32098	2.6835	-10.8932	4.13989e-16	1.22467e-14	26.2848
FHL1	-3.31392	10.4866	-9.94389	1.60452e-14	3.21373e-13	22.6459
GRIK5	-3.31265	4.88426	-8.77598	1.61721e-12	2.10401e-11	18.0588
HSPB8	-3.30882	8.8463	-7.56308	2.10541e-10	1.73312e-09	13.2261
HPSE2	-3.3088	3.36943	-14.8378	3.31192e-22	5.81143e-20	40.2366
CHST5	-3.30155	8.80597	-6.35718	2.62254e-08	1.42376e-07	8.45552
HHLA2	-3.30151	10.114	-9.75102	3.41063e-14	6.39454e-13	21.8958
VIT	-3.29942	3.65636	-10.0158	1.21257e-14	2.50191e-13	22.9245
SMYD1	-3.2959	3.78846	-5.06609	3.81661e-06	1.38657e-05	3.56904
LIFR	-3.2944	7.61584	-13.4132	4.19979e-20	3.95512e-18	35.4298
DSCAML1	-3.29361	3.9143	-10.197	5.99681e-15	1.33675e-13	23.625
CCL14	-3.28918	7.07104	-11.4255	5.56107e-17	2.09186e-15	28.2822
PCP4L1	-3.28774	3.91753	-7.06711	1.54548e-09	1.06223e-08	11.2521
KCNMA1	-3.27586	9.2396	-8.4205	6.70489e-12	7.69863e-11	16.646
SLC28A2	-3.27524	5.50852	-4.9834	5.18831e-06	1.84321e-05	3.26981
PCK1	-3.27403	10.5602	-8.10365	2.3924e-11	2.44116e-10	15.383
RELN	-3.2697	5.52507	-8.38072	7.86464e-12	8.90083e-11	16.4875
PLN	-3.26832	8.33174	-7.02333	1.84208e-09	1.24894e-08	11.0784
HEPACAM2	-3.26768	9.09713	-5.75459	2.78146e-07	1.24489e-06	6.13205
ADAMTSL3	-3.25662	6.69614	-8.35744	8.63437e-12	9.67068e-11	16.3948
SLC23A1	-3.25563	5.13965	-10.4992	1.8676e-15	4.64187e-14	24.7858
C20orf200	-3.25408	3.69668	-9.53099	8.09511e-14	1.38725e-12	21.036
CREB3L3	-3.25398	4.94853	-6.95544	2.41802e-09	1.59621e-08	10.8094
OSR1	-3.25009	5.34106	-9.51385	8.66043e-14	1.47428e-12	20.9689
TRPV3	-3.24942	4.0123	-9.56344	7.12455e-14	1.23641e-12	21.163
C10orf99	-3.2437	10.7212	-7.16192	1.05635e-09	7.52496e-09	11.6286
RGS13	-3.24333	4.03226	-10.473	2.06502e-15	5.11399e-14	24.6858
KCNK3	-3.24284	4.9477	-10.6642	9.91607e-16	2.64386e-14	25.4157
SNAP25	-3.24269	4.35403	-9.5361	7.9338e-14	1.36188e-12	21.056
ATP13A4	-3.23881	4.74252	-8.59515	3.3313e-12	4.06609e-11	17.3408
MT1F	-3.23814	8.1419	-9.50233	9.06271e-14	1.5326e-12	20.9237
ADHFE1	-3.23302	4.50104	-13.842	9.51393e-21	1.10351e-18	36.9045
CHST9	-3.23153	2.15911	-13.7152	1.47264e-20	1.63424e-18	36.4707
ABCA6	-3.23131	5.29103	-8.72389	1.99112e-12	2.53898e-11	17.8521
OMD	-3.22603	5.09305	-7.61294	1.72269e-10	1.44768e-09	13.4249
AFF3	-3.21146	5.79041	-9.96988	1.44988e-14	2.93551e-13	22.7467
DCLK1	-3.20866	6.12935	-10.3097	3.87719e-15	9.0248e-14	24.059
HSPB3	-3.20133	3.12375	-7.89737	5.48416e-11	5.17416e-10	14.5599
TRIM9	-3.18835	4.70654	-11.5168	3.9546e-17	1.54057e-15	28.6214
OLFM3	-3.18602	2.28134	-12.4215	1.42523e-18	8.45662e-17	31.9267
SCN11A	-3.18372	3.3938	-11.3641	6.99952e-17	2.5615e-15	28.0533
TPSG1	-3.17436	7.05718	-6.34318	2.77191e-08	1.49677e-07	8.40091
PLAC2	-3.17101	5.21903	-10.744	7.30918e-16	2.00612e-14	25.7192
GSTA1	-3.16133	5.76238	-6.46042	1.74186e-08	9.79738e-08	8.85905
NEFM	-3.16047	3.6088	-9.84577	2.35378e-14	4.55019e-13	22.2647
NCAM1	-3.15972	7.35118	-9.55524	7.35799e-14	1.27369e-12	21.131
SEMA6D	-3.15938	8.19735	-11.0339	2.42743e-16	7.66694e-15	26.816
ZNF536	-3.15897	4.04194	-13.2903	6.45631e-20	5.66445e-18	35.0025
GSTM5	-3.15818	5.99374	-11.3735	6.75604e-17	2.47681e-15	28.0885
CLEC10A	-3.15528	6.76651	-9.24263	2.52826e-13	3.87642e-12	19.9035
FER1L6	-3.15442	6.82983	-5.78075	2.51334e-07	1.13454e-06	6.23157
ASB2	-3.1448	7.48863	-10.101	8.70434e-15	1.8634e-13	23.2543
ATCAY	-3.14436	2.93743	-11.0236	2.52437e-16	7.91227e-15	26.777
FRMPD4	-3.14208	2.149	-9.09261	4.58388e-13	6.68848e-12	19.3119
KCNMB1	-3.14137	7.83985	-7.41406	3.83467e-10	2.9764e-09	12.632
CHAD	-3.13625	5.0987	-8.25879	1.2828e-11	1.38318e-10	16.0017
GHR	-3.12932	6.7138	-11.6303	2.59239e-17	1.07007e-15	29.0415
TAT	-3.12177	2.42249	-10.5487	1.54356e-15	3.94145e-14	24.9754
PDK4	-3.12107	10.1165	-11.3147	8.42231e-17	2.97208e-15	27.8692
TUSC5	-3.11143	3.02051	-5.51382	7.03048e-07	2.9283e-06	5.22263
MFAP5	-3.10369	8.28653	-8.56084	3.82166e-12	4.60979e-11	17.2043
C1QTNF7	-3.10224	5.76411	-10.5157	1.75279e-15	4.39912e-14	24.8489
XKR4	-3.09482	2.2159	-11.2322	1.14858e-16	3.91702e-15	27.5605
MYOCD	-3.08845	7.20044	-8.42405	6.61032e-12	7.59853e-11	16.6601
TSPAN7	-3.08006	9.70785	-12.7773	3.96656e-19	2.75113e-17	33.1983
CIDEC	-3.07757	5.75812	-7.63115	1.60091e-10	1.35813e-09	13.4976
FLJ32063	-3.07514	7.1324	-5.73813	2.96452e-07	1.31821e-06	6.06948
FOXD3	-3.07009	2.61877	-9.87053	2.13669e-14	4.17377e-13	22.3609
EFHC2	-3.06925	3.68653	-13.7801	1.17723e-20	1.33527e-18	36.6931
FOXP2	-3.06646	6.02441	-7.14303	1.13962e-09	8.07048e-09	11.5535
SEMA3D	-3.06489	5.37505	-9.59235	6.35851e-14	1.11668e-12	21.2762
KRT20	-3.06281	13.2127	-8.01988	3.35039e-11	3.30372e-10	15.0488
KCTD4	-3.05907	2.50368	-10.8924	4.15249e-16	1.22663e-14	26.2818
JPH2	-3.05604	7.50796	-7.12518	1.22424e-09	8.60444e-09	11.4827
THRB	-3.05335	7.95303	-8.34675	9.01264e-12	1.0056e-10	16.3522
ENTPD3	-3.05182	4.88502	-9.33273	1.77005e-13	2.80828e-12	20.258
DPF3	-3.05002	5.35675	-15.5908	2.84052e-23	7.88053e-21	42.6707
SPINK2	-3.04937	2.9123	-11.3116	8.52239e-17	2.99597e-15	27.8575
GRIN2A	-3.04769	3.00539	-11.328	8.01305e-17	2.84873e-15	27.9188
FCER1A	-3.04525	4.56626	-9.27504	2.22381e-13	3.44824e-12	20.0311
EPHA6	-3.0421	2.40607	-7.16468	1.04473e-09	7.44733e-09	11.6396
GCNT3	-3.04117	11.1545	-7.62963	1.61078e-10	1.36537e-09	13.4915
BMP5	-3.04042	5.21103	-9.22405	2.72137e-13	4.14463e-12	19.8303
MYLK	-3.03896	12.2934	-7.97185	4.06418e-11	3.92648e-10	14.8572
KIF5A	-3.03716	4.45234	-7.83535	7.03844e-11	6.4856e-10	14.3124
IGSF11	-3.0298	2.80507	-8.77111	1.64893e-12	2.14121e-11	18.0395
MUSTN1	-3.02782	5.08439	-11.2759	9.74446e-17	3.34538e-15	27.7241
NRG2	-3.02488	2.35387	-10.1886	6.19374e-15	1.37115e-13	23.5929
GPM6B	-3.02454	6.50162	-9.5073	8.88694e-14	1.5066e-12	20.9432
NEGR1	-3.01887	7.5467	-10.0614	1.01505e-14	2.12991e-13	23.1014
UNC5C	-3.01187	4.85206	-11.6242	2.65136e-17	1.08865e-15	29.0191
MAB21L2	-3.01143	8.58661	-6.718	6.24879e-09	3.82036e-08	9.87102
LMX1A	-3.01103	2.30481	-15.4236	4.87136e-23	1.20383e-20	42.1364
FGFBP2	-3.01043	3.39959	-10.2755	4.4244e-15	1.01376e-13	23.9276
C6orf186	-3.01036	3.12684	-8.72933	1.94834e-12	2.49063e-11	17.8737
B3GALT5	-3.00715	7.84567	-7.74607	1.00812e-10	8.98299e-10	13.9561
LGI4	-3.00438	6.86142	-11.0339	2.42729e-16	7.66694e-15	26.8161
RNF150	-2.99676	5.24066	-7.10691	1.31736e-09	9.1835e-09	11.4101
CLDN23	-2.99496	9.27639	-11.6729	2.21284e-17	9.32845e-16	29.199
ATRNL1	-2.9945	3.66018	-7.93306	4.75047e-11	4.52983e-10	14.7024
SRPX	-2.99082	7.83155	-10.9303	3.59537e-16	1.08072e-14	26.4251
CYP4B1	-2.98625	3.28755	-7.75366	9.77791e-11	8.73544e-10	13.9864
CALB2	-2.98423	6.31243	-7.22272	8.27503e-10	5.99891e-09	11.8703
FAM189A2	-2.98332	4.83162	-11.2166	1.21795e-16	4.1467e-15	27.5022
NEU4	-2.98304	7.89395	-7.79485	8.28444e-11	7.52565e-10	14.1508
RIC3	-2.9821	3.74289	-9.0624	5.16827e-13	7.41257e-12	19.1926
SLC17A7	-2.98082	3.91268	-13.1395	1.09712e-19	9.08219e-18	34.4757
UCN3	-2.97277	3.89096	-8.05037	2.96376e-11	2.95369e-10	15.1705
GABRG2	-2.96596	2.1875	-11.1147	1.78864e-16	5.81023e-15	27.1198
SYN2	-2.96588	3.71487	-8.93692	8.51374e-13	1.17307e-11	18.6964
PENK	-2.96577	3.57049	-5.16104	2.67665e-06	1.00057e-05	3.91518
FCER2	-2.96239	3.90577	-6.31758	3.06723e-08	1.648e-07	8.30112
SULT1B1	-2.95217	8.25514	-11.4374	5.32057e-17	2.01162e-15	28.3262
C15orf48	-2.95175	11.9739	-9.04741	5.48557e-13	7.83708e-12	19.1334
IGSF10	-2.94976	5.73567	-7.19164	9.37535e-10	6.72757e-09	11.7467
CPB1	-2.94575	2.03577	-6.2523	3.96941e-08	2.09222e-07	8.04703
UCHL1	-2.94496	6.97424	-8.14786	2.00295e-11	2.0674e-10	15.5594
SEMA6A	-2.94477	9.52735	-11.033	2.43578e-16	7.68149e-15	26.8126
SH3GL2	-2.94266	2.81683	-15.3873	5.47866e-23	1.31932e-20	42.02
ANKS1B	-2.94073	2.99311	-9.07453	4.92523e-13	7.12287e-12	19.2405
SCIN	-2.94058	8.75665	-8.64129	2.76989e-12	3.41947e-11	17.5241
NAALADL1	-2.93752	7.12267	-10.7723	6.56156e-16	1.84029e-14	25.8266
NPY1R	-2.92841	5.43939	-8.07651	2.66815e-11	2.69838e-10	15.2748
MS4A10	-2.92675	1.82489	-8.55275	3.94737e-12	4.73362e-11	17.1722
AADACL2	-2.92322	1.51377	-14.1136	3.76032e-21	5.04571e-19	37.8261
CALY	-2.92116	2.38473	-8.57436	3.62028e-12	4.37718e-11	17.2581
CORO2B	-2.92109	5.18319	-9.71855	3.87372e-14	7.16464e-13	21.7691
WDR17	-2.9204	3.39832	-9.02131	6.08536e-13	8.57464e-12	19.0302
LHFPL4	-2.91981	3.28192	-6.99416	2.07056e-09	1.38645e-08	10.9628
THBS4	-2.91957	7.20971	-3.92067	0.000220953	0.000580443	-0.354435
WSCD2	-2.91935	3.7776	-7.50678	2.6408e-10	2.11945e-09	13.0015
ST8SIA3	-2.91071	2.08496	-10.2154	5.58465e-15	1.25304e-13	23.6959
HBA2	-2.9076	8.66271	-7.98985	3.78043e-11	3.68529e-10	14.929
HLF	-2.90331	6.26827	-8.58457	3.47535e-12	4.22547e-11	17.2987
GPER	-2.90155	6.39466	-9.71465	3.93343e-14	7.25546e-13	21.7539
OGDHL	-2.90079	4.41601	-7.19242	9.34587e-10	6.71111e-09	11.7499
MAB21L1	-2.89792	3.10116	-10.9877	2.89145e-16	8.91314e-15	26.6419
CD79A	-2.89375	7.92538	-6.17853	5.30879e-08	2.73568e-07	7.76064
CPM	-2.89174	9.38321	-12.8544	3.01284e-19	2.1703e-17	33.4717
ROPN1	-2.88807	2.05593	-14.3316	1.79726e-21	2.65452e-19	38.5588
LGALS9B	-2.88693	5.97253	-7.37007	4.57677e-10	3.5047e-09	12.4567
HSPB7	-2.88461	7.42981	-5.77397	2.58027e-07	1.16322e-06	6.20577
FAM129A	-2.87838	9.47664	-8.83926	1.25637e-12	1.66947e-11	18.3097
P2RY1	-2.87752	6.80307	-13.0398	1.56013e-19	1.2319e-17	34.1258
BAALC	-2.8757	4.55492	-11.1185	1.76318e-16	5.73663e-15	27.1341
RICH2	-2.87288	9.10201	-11.5158	3.9703e-17	1.54375e-15	28.6174
PDE2A	-2.87278	7.18197	-10.0624	1.01123e-14	2.12492e-13	23.1052
NR3C2	-2.87055	9.6898	-12.6474	6.31549e-19	4.18248e-17	32.7359
L1CAM	-2.87039	7.89533	-5.96716	1.2164e-07	5.83882e-07	6.94472
HS3ST6	-2.87038	2.01587	-8.13667	2.09507e-11	2.15643e-10	15.5148
CD300LG	-2.85983	2.73809	-7.02233	1.8495e-09	1.25273e-08	11.0745
SDPR	-2.85909	8.67774	-10.1723	6.59996e-15	1.45383e-13	23.5297
SLC38A4	-2.85842	5.95049	-6.1329	6.35261e-08	3.2306e-07	7.58389
HTR3A	-2.85462	3.19928	-8.52346	4.43849e-12	5.27633e-11	17.0557
LIPC	-2.85357	3.55356	-9.04249	5.59392e-13	7.95864e-12	19.1139
PTH1R	-2.84631	3.71171	-10.5338	1.63481e-15	4.13333e-14	24.9182
PHOX2A	-2.84598	2.32674	-12.1389	3.98133e-18	2.13412e-16	30.9051
PTN	-2.84586	6.84304	-10.9924	2.84052e-16	8.7693e-15	26.6596
C12orf53	-2.84557	4.42235	-11.0074	2.684e-16	8.37425e-15	26.716
CNGB1	-2.84428	2.08565	-11.4775	4.57992e-17	1.75421e-15	28.4753
GNG3	-2.84388	3.55645	-11.63	2.59556e-17	1.07007e-15	29.0403
TMEM37	-2.84077	9.09898	-10.5473	1.55219e-15	3.95857e-14	24.9698
KIAA1644	-2.83893	6.70742	-7.19699	9.17592e-10	6.60203e-09	11.768
SNCG	-2.83682	5.84725	-10.5611	1.47182e-15	3.77922e-14	25.0227
SLC6A15	-2.83681	2.20764	-11.8033	1.36592e-17	6.27345e-16	29.6789
SVOPL	-2.83597	2.32084	-7.55075	2.21255e-10	1.80683e-09	13.1769
SHISA3	-2.83468	5.6861	-7.0818	1.45704e-09	1.0064e-08	11.3104
BEND5	-2.83265	4.25686	-9.11548	4.18589e-13	6.16256e-12	19.4022
PCDH10	-2.83211	2.83594	-9.03851	5.68304e-13	8.04639e-12	19.0982
PEG3	-2.82928	5.86315	-8.92509	8.92434e-13	1.22308e-11	18.6496
TMEM132C	-2.82896	3.82948	-7.88683	5.72168e-11	5.36865e-10	14.5179
CR2	-2.82706	6.15913	-4.27416	6.63605e-05	0.00019374	0.79991
PKNOX2	-2.82633	4.55982	-12.4163	1.45242e-18	8.59316e-17	31.9079
PGR	-2.82238	5.32731	-8.77979	1.59282e-12	2.07405e-11	18.0739
EPB41L3	-2.82129	9.30282	-11.4497	5.08159e-17	1.92481e-15	28.3719
TTLL6	-2.82126	5.986	-8.89465	1.00746e-12	1.36343e-11	18.5291
CDKL2	-2.81558	4.0314	-10.2769	4.4006e-15	1.00943e-13	23.933
CHL1	-2.81518	7.05701	-10.4461	2.29066e-15	5.59183e-14	24.5826
PRELP	-2.81455	9.23942	-7.1048	1.3286e-09	9.24932e-09	11.4017
C14orf176	-2.81195	7.69182	-11.6113	2.7824e-17	1.1305e-15	28.9711
ADAM6	-2.80816	15.5587	-6.15177	5.8982e-08	3.01594e-07	7.65696
NTNG1	-2.803	2.83352	-7.38484	4.31288e-10	3.31127e-09	12.5156
RBM24	-2.80275	5.3224	-8.66286	2.54098e-12	3.16735e-11	17.6098
SLC27A6	-2.79672	2.73278	-13.3996	4.40409e-20	4.09122e-18	35.3826
F13A1	-2.79461	9.19277	-8.1294	2.15718e-11	2.21656e-10	15.4858
NKX2-3	-2.79218	7.39331	-11.6781	2.17066e-17	9.20173e-16	29.2181
TMEM220	-2.78847	6.80775	-11.537	3.66883e-17	1.45689e-15	28.696
PDE3A	-2.788	8.27197	-8.27664	1.19408e-11	1.29638e-10	16.0729
P2RY12	-2.78679	3.56495	-10.1069	8.50508e-15	1.82837e-13	23.2774
LOC145837	-2.78156	4.68039	-7.77805	8.86373e-11	7.98559e-10	14.0837
ISX	-2.77899	9.33654	-6.31263	3.12778e-08	1.67834e-07	8.28185
LRRTM1	-2.77661	3.31844	-6.2736	3.64922e-08	1.93588e-07	8.12989
SNAP91	-2.7764	2.93184	-8.99288	6.81383e-13	9.52915e-12	18.9178
CCL28	-2.77328	8.05459	-9.09275	4.58127e-13	6.68848e-12	19.3125
TRIM40	-2.77265	5.7597	-7.61181	1.73051e-10	1.45306e-09	13.4204
LGALS9C	-2.77207	8.29248	-9.27678	2.20856e-13	3.43238e-12	20.0379
NTN1	-2.77008	7.84753	-10.853	4.82366e-16	1.39675e-14	26.1327
AGPAT9	-2.76957	8.10537	-13.5816	2.33776e-20	2.48675e-18	36.0117
SLC15A1	-2.76909	5.60223	-4.63046	1.88223e-05	6.06436e-05	2.01759
MYL9	-2.76389	12.8982	-6.38571	2.34239e-08	1.28272e-07	8.5669
DHRS11	-2.76101	10.115	-14.7466	4.48175e-22	7.73196e-20	39.9366
DHRS7C	-2.7601	1.54204	-11.7659	1.56827e-17	6.96896e-16	29.5415
CRABP1	-2.75664	3.72937	-7.30609	5.91934e-10	4.42227e-09	12.202
SEPP1	-2.75556	13.3417	-10.4145	2.58724e-15	6.24895e-14	24.4614
FAM132A	-2.75217	5.17586	-8.44881	5.98569e-12	6.93097e-11	16.7587
CYP3A4	-2.75065	4.15604	-5.28142	1.70159e-06	6.58008e-06	4.35766
RASGEF1C	-2.74969	2.35515	-9.82531	2.54989e-14	4.89246e-13	22.1851
SECTM1	-2.74655	9.75754	-10.0017	1.28102e-14	2.6273e-13	22.8699
DUSP26	-2.74394	3.69906	-11.3525	7.31059e-17	2.62069e-15	28.0101
TTR	-2.74291	3.20807	-7.11059	1.29807e-09	9.06439e-09	11.4247
XDH	-2.74096	9.31044	-9.42656	1.22186e-13	2.00517e-12	20.6266
CXCL12	-2.72997	10.2078	-10.2955	4.09477e-15	9.45621e-14	24.0046
TUBAL3	-2.72629	7.52494	-8.02912	3.22818e-11	3.19395e-10	15.0857
C1orf186	-2.72478	3.48074	-10.0902	9.07576e-15	1.93484e-13	23.2128
REP15	-2.72413	7.6089	-6.51021	1.42939e-08	8.15603e-08	9.0541
LILRB5	-2.72149	6.83943	-8.52557	4.40124e-12	5.23811e-11	17.0641
RNF112	-2.72097	4.38532	-12.866	2.89122e-19	2.09741e-17	33.5126
RYR3	-2.72077	4.47585	-9.13986	3.79981e-13	5.63249e-12	19.4984
NECAB1	-2.71976	5.27953	-7.66864	1.37676e-10	1.1866e-09	13.6471
FRMD3	-2.71821	6.04764	-9.08466	4.73083e-13	6.87846e-12	19.2805
DYNC1I1	-2.71787	4.73796	-6.14833	5.97873e-08	3.05332e-07	7.64361
SEZ6	-2.71422	2.2158	-11.2776	9.68461e-17	3.33419e-15	27.7303
RPL10L	-2.71407	2.81021	-10.2084	5.73645e-15	1.28429e-13	23.6692
PDE9A	-2.71217	9.58101	-10.7237	7.89656e-16	2.14724e-14	25.6423
CNTNAP3	-2.71172	4.44527	-7.97985	3.93553e-11	3.81656e-10	14.8891
SLC16A9	-2.70967	8.40307	-7.79311	8.34258e-11	7.57176e-10	14.1438
AQPEP	-2.70767	3.06057	-8.22104	1.49276e-11	1.58297e-10	15.8512
MYPN	-2.7047	3.01128	-9.4109	1.29975e-13	2.12114e-12	20.5651
CCL13	-2.70221	6.04976	-6.51244	1.41681e-08	8.08874e-08	9.06283
STAB2	-2.70169	3.66325	-8.93466	8.5907e-13	1.18208e-11	18.6875
POPDC2	-2.70098	6.38608	-5.51206	7.07791e-07	2.94686e-06	5.21604
S100B	-2.70056	6.55227	-8.26316	1.26052e-11	1.36274e-10	16.0191
MST1P9	-2.69694	5.81238	-7.09943	1.35754e-09	9.42518e-09	11.3804
SCUBE2	-2.69658	7.19197	-8.06513	2.79309e-11	2.80676e-10	15.2294
CCDC69	-2.69343	9.86802	-9.77292	3.1302e-14	5.90111e-13	21.9811
MPZ	-2.69252	5.90361	-9.34511	1.6855e-13	2.69286e-12	20.3067
TM6SF2	-2.69112	4.92818	-6.94122	2.5598e-09	1.6833e-08	10.753
IL6R	-2.69088	8.36653	-13.1299	1.13474e-19	9.31844e-18	34.4422
ADAM33	-2.69024	6.64858	-7.72846	1.08218e-10	9.54752e-10	13.8858
SLC22A18AS	-2.68975	7.70047	-10.7467	7.23283e-16	1.99048e-14	25.7296
NBEA	-2.68885	6.23023	-7.54431	2.2706e-10	1.84908e-09	13.1512
FCRLA	-2.68676	4.85973	-5.78939	2.4305e-07	1.10175e-06	6.26449
HOXD1	-2.68512	5.50255	-11.0066	2.69161e-16	8.38524e-15	26.7132
ENTPD8	-2.68426	9.0845	-7.20266	8.96937e-10	6.46109e-09	11.7906
MT3	-2.67925	3.95704	-6.16256	5.65307e-08	2.90144e-07	7.69876
JAM2	-2.67924	6.73203	-9.45409	1.09611e-13	1.82064e-12	20.7346
KCNA1	-2.67915	2.19305	-6.34285	2.77552e-08	1.49833e-07	8.39963
LOC401093	-2.67783	7.38281	-8.7378	1.88353e-12	2.41529e-11	17.9073
SYT5	-2.67437	2.97081	-11.3918	6.30883e-17	2.33349e-15	28.1567
IL1R2	-2.67089	8.24338	-7.91255	5.15921e-11	4.89005e-10	14.6205
GRIA4	-2.67065	3.19353	-10.604	1.24889e-15	3.25377e-14	25.1861
ELAVL3	-2.66937	2.06545	-9.62094	5.68264e-14	1.01084e-12	21.3879
ROS1	-2.66907	2.5974	-9.7157	3.91723e-14	7.23208e-13	21.758
NR5A2	-2.6679	8.43555	-11.8127	1.31896e-17	6.08501e-16	29.7137
SYT10	-2.66558	1.85778	-14.9157	2.5604e-22	4.82248e-20	40.4918
NTRK3	-2.6652	3.39487	-9.96025	1.50535e-14	3.03583e-13	22.7094
C8orf80	-2.6641	4.40887	-7.5337	2.36971e-10	1.92141e-09	13.1089
LRAT	-2.66387	2.39883	-7.74879	9.97147e-11	8.89675e-10	13.9669
CKB	-2.66302	13.4104	-9.62631	5.564e-14	9.92432e-13	21.4089
CLEC4G	-2.66128	2.92278	-7.5956	1.84716e-10	1.5403e-09	13.3557
RNF152	-2.65868	5.22668	-13.5429	2.67383e-20	2.77241e-18	35.8783
EEF1A2	-2.65762	5.07664	-7.1412	1.14802e-09	8.12158e-09	11.5463
LRMP	-2.65681	6.76555	-8.36049	8.52908e-12	9.57365e-11	16.407
DARC	-2.65679	7.978	-8.32714	9.75022e-12	1.08084e-10	16.2741
STXBP5L	-2.65363	2.73315	-7.97192	4.06311e-11	3.92648e-10	14.8575
FGL2	-2.6522	9.93796	-12.1984	3.20465e-18	1.74977e-16	31.1209
CDKN2B	-2.64613	9.70531	-11.0586	2.21123e-16	7.04915e-15	26.9088
ABCB5	-2.64593	2.48742	-6.90389	2.97243e-09	1.92687e-08	10.6053
PLIN1	-2.64519	5.25427	-4.88376	7.49274e-06	2.5949e-05	2.91204
GRIK1	-2.64242	2.06363	-14.8881	2.80445e-22	5.18696e-20	40.4015
IGFBP6	-2.64176	8.14796	-11.5464	3.54248e-17	1.41492e-15	28.7309
C1orf125	-2.64072	4.51743	-6.7755	4.96694e-09	3.09567e-08	10.0978
NRSN1	-2.63962	2.18215	-8.55772	3.86961e-12	4.65669e-11	17.192
MAOB	-2.63757	7.90043	-7.48484	2.88451e-10	2.29442e-09	12.9141
BLK	-2.63722	4.40311	-5.60696	4.91783e-07	2.10515e-06	5.57291
METTL7A	-2.63249	10.8575	-12.4619	1.23154e-18	7.48035e-17	32.0719
RUNDC3B	-2.63029	5.84541	-11.2002	1.2954e-16	4.36691e-15	27.4409
[truncated: 2,180 more rows]

## Sheet: MS-proteins
The proteins specially pulled down by EX-eRNA probes.
Symbol	Accession	Coverage....	Peptides	PSMs	Unique.Peptides	AAs	MW..kDa.	calc..pI	Score.Sequest.HT..Sequest.HT	Peptides..by.Search.Engine...Sequest.HT	Protein.Pathway.Groups	Found.in.Sample...S1..F1..Sample	Protein.Groups	Uniprot.Description
SMC1B	Q8NDV3	2	4	4	2	1235	143.7	7.5	2.1	4	0	High	1	Structural maintenance of chromosomes protein 1B
REC8	O95072	2	1	1	1	547	62.6	5.01	0	1	0	Medium	1	Meiotic recombination protein REC8 homolog
STAG3	Q9UJ98	2	3	3	3	1225	138.9	5.39	3.33	3	0	Medium	1	Cohesin subunit SA-3
DDX11	Q96FC9	2	2	2	2	970	108.2	7.31	0	2	0	Medium	1	ATP-dependent DNA helicase DDX11
SMC5	Q8IY18	1	1	1	1	1101	128.7	8.38	0	1	0	Medium	1	Structural maintenance of chromosomes protein 5
MED1	Q15648	1	2	2	2	1581	168.4	8.73	0	2	0	Medium	1	Mediator of RNA polymerase II transcription subunit 1
MED25	Q71SY5	1	1	1	1	747	78.1	8.34	0	1	0	Medium	1	Mediator of RNA polymerase II transcription subunit 25
MED6	O75586	5	2	2	2	246	28.4	8.62	0	2	0	Medium	1	Mediator of RNA polymerase II transcription subunit 6
BCLA3	A2AJT9	1	1	1	1	711	83.8	9.7	0	1	0	Medium	1	Uncharacterized protein CXorf23
MD12L	Q86YW9	2	3	4	2	2145	240	7.77	0	3	0	Medium	1	Mediator of RNA polymerase II transcription subunit 12-like protein
TAF6L	Q9Y6J9	2	1	1	1	622	67.8	8.97	2.16	1	0	Medium	1	TAF6-like RNA polymerase II p300/CBP-associated factor-associated factor 65 kDa subunit 6L
T2FA	P35269	1	1	1	1	517	58.2	7.49	0	1	0	Medium	1	General transcription factor IIF subunit 1
TAF5	Q15542	3	2	2	1	800	86.8	5.64	0	2	0	Medium	1	Transcription initiation factor TFIID subunit 5
ERCC3	P19447	1	1	1	1	782	89.2	7.23	0	1	0	Medium	1	TFIIH basal transcription factor complex helicase XPB subunit
2024-09-01	Q8WYJ6	3	1	1	1	372	42.4	5.8	2.07	1	0	High	1	Septin-5
2024-09-10	Q9P0V9	5	2	2	2	454	52.6	6.8	0	2	0	Medium	1	Septin-10
2024-09-11	Q9NVA2	15	6	7	4	429	49.4	6.81	12.4	6	0	High	1	Septin-11
1433B	P31946	34	9	9	3	246	28.1	4.83	15.28	9	0	High	1	14-3-3 protein zeta/delta
1433F	Q04917	19	6	6	1	246	28.2	4.84	9.92	6	0	High	1	14-3-3 protein eta
2024-09-02	Q15019	5	1	1	1	361	41.5	6.6	0	1	0	Medium	1	Septin-2
2AAA	P30153	30	15	16	11	589	65.3	5.11	38.49	15	0	High	1	Serine/threonine-protein phosphatase 2A 65 kDa regulatory subunit A alpha isoform
2AAB	P30154	12	5	5	1	601	66.2	4.94	6.91	5	0	Medium	1	Serine/threonine-protein phosphatase 2A 65 kDa regulatory subunit A beta isoform
3BP1	Q9Y3L3	6	4	4	3	701	75.7	6.77	1.96	4	0	High	1	SH3 domain-binding protein 1
3HAO	P46952	10	2	2	2	286	32.5	5.88	0	2	0	Medium	1	\3-hydroxyanthranilate 3,4-dioxygenase\""
3HIDH	P31937	5	1	1	1	336	35.3	8.13	0	1	0	Medium	1	\3-hydroxyisobutyrate dehydrogenase, mitochondrial\""
5HT2B	P41595	1	1	1	1	481	54.3	9.1	0	1	0	Medium	1	5-hydroxytryptamine receptor 2B
5NTD	P21589	3	1	1	1	574	63.3	7.03	0	1	0	Medium	1	5'-nucleotidase
2024-09-07	Q16181	12	5	7	4	437	50.6	8.63	11.85	5	0	High	1	Septin-7
2024-09-08	Q92599	5	2	3	1	483	55.7	6.28	7.26	2	0	Medium	1	Septin-8
2024-09-09	Q9UHD8	14	8	9	6	586	65.4	8.97	16.35	8	0	High	1	Septin-9
A1AG2	P19652	7	1	3	1	201	23.6	5.11	0	1	0	Medium	1	Alpha-1-acid glycoprotein 2
A2MG	P01023	2	3	3	2	1474	163.2	6.46	2.01	3	0	Medium	1	Alpha-2-macroglobulin
A2ML1	A8K2U0	2	3	3	2	1454	161	5.73	2.3	3	0	High	1	Alpha-2-macroglobulin-like protein 1
A4AS1	Q5T5F5	8	1	1	1	129	14.1	11.14	0	1	0	Medium	1	Uncharacterized protein ADAMTSL4-AS1
AAAS	Q9NRG9	7	3	3	3	546	59.5	7.5	3.08	3	0	High	1	Aladin
AAAT	Q15758	14	6	8	6	541	56.6	5.48	23.11	6	0	High	1	Neutral amino acid transporter B(0)
ABC3B	Q9UH17	3	1	1	1	382	45.9	6.06	0	1	0	Medium	1	DNA dC->dU-editing enzyme APOBEC-3B
ABC3H	Q6NTF7	5	1	1	1	200	23.5	8.5	0	1	0	Medium	1	DNA dC->dU-editing enzyme APOBEC-3H
ABCA1	O95477	0	2	2	1	2261	254.1	6.86	0	2	0	Medium	1	ATP-binding cassette sub-family A member 1
ABCA3	Q99758	0	1	1	1	1704	191.2	7.62	0	1	0	Medium	1	ATP-binding cassette sub-family A member 3
ABCA6	Q8N139	0	1	1	1	1617	184.2	7.36	0	1	0	Medium	1	ATP-binding cassette sub-family A member 10
ABCA7	Q8IZY2	1	3	4	1	2146	234.2	7.24	1.61	3	0	Medium	1	ATP-binding cassette sub-family A member 7
ABCAA	Q8WWZ4	0	1	1	1	1543	175.7	6.65	0	1	0	Medium	1	ATP-binding cassette sub-family A member 10
ABCAD	Q86UQ4	0	2	2	1	5058	575.8	6.46	0	2	0	Medium	1	ATP-binding cassette sub-family A member 13
ABCB5	Q2M3G0	2	2	2	2	1257	138.6	7.53	0	2	0	Medium	1	ATP-binding cassette sub-family B member 5
ABCB7	O75027	2	2	2	2	752	82.6	9.33	1.77	2	0	Medium	1	\ATP-binding cassette sub-family B member 7, mitochondrial\""
ABCBB	O95342	3	4	4	4	1321	146.3	6.57	1.62	4	0	Medium	1	Bile salt export pump
ABCD2	Q9UBJ2	3	2	2	2	740	83.2	8.92	0	2	0	Medium	1	ATP-binding cassette sub-family D member 2
ABCD3	P28288	6	5	6	3	659	75.4	9.36	5.34	5	0	High	1	ATP-binding cassette sub-family D member 3
ABCF1	Q8NE71	5	3	4	3	845	95.9	6.8	6.19	3	0	High	1	ATP-binding cassette sub-family F member 1
ABCF2	Q9UG63	18	11	12	11	623	71.2	7.37	24.17	11	0	High	1	ATP-binding cassette sub-family F member 2
ABCF3	Q9NUQ8	3	2	2	2	709	79.7	6.34	2.03	2	0	High	1	ATP-binding cassette sub-family F member 3
ABCG5	Q9H222	2	1	3	1	651	72.5	8.95	0	1	0	Medium	1	ATP-binding cassette sub-family G member 5
ABH15	Q6UXT9	1	1	1	1	468	51.7	7.61	0	1	0	Medium	1	Protein ABHD15
ABHDB	Q8NFV4	2	1	1	1	315	34.7	9.48	1.7	1	0	Medium	1	Protein ABHD11
ABHGB	Q9H3Z7	2	1	1	1	469	52.5	8.57	0	1	0	Medium	1	Protein ABHD16B
ABI1	Q8IZP0	5	2	2	2	508	55	7.06	1.84	2	0	Medium	1	Abl interactor 1
ABL2	P42684	2	2	2	2	1182	128.3	8.07	0	2	0	Medium	1	Abelson tyrosine-protein kinase 2
ACAD9	Q9H845	14	8	8	8	621	68.7	7.96	12.28	8	0	High	1	\Very long-chain specific acyl-CoA dehydrogenase, mitochondrial\""
ACADS	P16219	6	2	2	2	412	44.3	7.99	1.75	2	0	Medium	1	\Short-chain specific acyl-CoA dehydrogenase, mitochondrial\""
ACADV	P49748	39	22	29	22	655	70.3	8.75	66.56	22	0	High	1	\Very long-chain specific acyl-CoA dehydrogenase, mitochondrial\""
ACAP1	Q15027	3	2	2	2	740	81.5	7.66	1.88	2	0	Medium	1	\Arf-GAP with coiled-coil, ANK repeat and PH domain-containing protein 2\""
ACBD7	Q8N6N7	22	1	1	1	88	9.8	6.71	0	1	0	Medium	1	Acyl-CoA-binding domain-containing protein 7
ACBG2	Q5FVE4	2	1	1	1	666	74.3	8.46	0	1	0	Medium	1	Long-chain-fatty-acid--CoA ligase ACSBG2
ACBP	P07108	11	1	1	1	87	10	6.57	0	1	0	Medium	1	Acyl-CoA-binding protein
ACKMT	Q6P4H8	6	1	1	1	233	26.1	8.87	0	1	0	Medium	1	Protein FAM173B
ACKR4	Q9NPB9	3	1	1	1	350	39.9	8.5	0	1	0	Medium	1	Atypical chemokine receptor 4
ACL6A	O96019	3	1	1	1	429	47.4	5.6	0	1	0	Medium	1	Actin-like protein 6A
ACOT2	P49753	9	2	2	2	483	53.2	8.47	0	2	0	Medium	1	\Acyl-coenzyme A thioesterase 2, mitochondrial\""
ACOT9	Q9Y305	3	2	2	1	439	49.9	8.6	0	2	0	Medium	1	\Acyl-coenzyme A thioesterase 9, mitochondrial\""
ACOX1	Q15067	2	1	1	1	660	74.4	8.16	0	1	0	Medium	1	Peroxisomal acyl-coenzyme A oxidase 1
ACPM	O14561	4	1	1	1	156	17.4	4.93	1.82	1	0	Medium	1	\Acyl carrier protein, mitochondrial\""
ACS2B	Q68CK6	4	3	4	3	577	64.2	8.25	0	3	0	Medium	1	\Acyl-coenzyme A synthetase ACSM2B, mitochondrial\""
ACS2L	Q9NUB1	9	4	4	4	689	74.8	7.11	5.01	4	0	High	1	\Acetyl-coenzyme A synthetase, cytoplasmic\""
ACSA	Q9NR19	4	3	3	3	701	78.5	6.46	4.18	3	0	High	1	\Acetyl-coenzyme A synthetase, cytoplasmic\""
ACSL1	P33121	12	9	9	9	698	77.9	7.15	11.62	9	0	High	1	Long-chain-fatty-acid--CoA ligase 1
ACSL4	O60488	17	11	11	8	711	79.1	8.38	16.01	11	0	High	1	Long-chain-fatty-acid--CoA ligase 4
ACSL5	Q9ULC5	2	1	1	1	683	75.9	6.92	1.91	1	0	High	1	Long-chain-fatty-acid--CoA ligase 5
ACTG	P63261	46	17	37	1	375	41.8	5.48	86.08	17	0	High	1	\Actin, cytoplasmic 2\""
ACTS	P68133	27	11	23	1	377	42	5.39	45.1	11	0	High	1	\Actin, aortic smooth muscle\""
ACTZ	P61163	4	2	3	1	376	42.6	6.64	6.15	2	0	High	1	Beta-centractin
ACVR1	Q04771	3	1	1	1	509	57.1	7.33	0	1	0	Medium	1	Serine/threonine-protein kinase receptor R3
ADA10	O14672	8	5	5	5	748	84.1	7.77	9.92	5	0	High	1	Disintegrin and metalloproteinase domain-containing protein 10
ADA18	Q9Y3Q7	2	1	1	1	739	82.8	7.28	0	1	0	Medium	1	Disintegrin and metalloproteinase domain-containing protein 18
ADAD1	Q96M93	2	1	1	1	576	64.4	9.01	0	1	0	Medium	1	Adenosine deaminase domain-containing protein 1
ADAS	O00116	18	10	11	10	658	72.9	7.34	20.08	10	0	High	1	\Alkyldihydroxyacetonephosphate synthase, peroxisomal\""
ADCK5	Q3MIX3	3	1	2	1	580	65.8	8.87	0	1	0	Medium	1	Uncharacterized aarF domain-containing protein kinase 5
ADCY9	O60503	1	1	1	1	1353	150.6	7.34	0	1	0	Medium	1	Adenylate cyclase type 9
ADGB	Q8N7X0	1	2	2	1	1667	189.6	8.31	0	2	0	Medium	1	Androglobin
ADT2	P05141	23	7	7	2	298	32.8	9.69	14.17	7	0	High	1	ADP/ATP translocase 2
ADT3	P12236	19	6	6	1	298	32.8	9.74	11.32	6	0	Medium	1	ADP/ATP translocase 3
AGGF1	Q8N302	2	1	1	1	714	80.9	5.44	2.02	1	0	Medium	1	Angiogenic factor with G patch and FHA domains 1
AGK	Q53H12	7	3	3	3	422	47.1	8.09	0	3	0	Medium	1	\Acylglycerol kinase, mitochondrial\""
AGM1	O95394	3	2	2	2	542	59.8	6.25	0	2	0	Medium	1	Phosphoacetylglucosamine mutase
AGO3	Q9H9G7	2	2	2	2	860	97.3	9.11	0	2	0	Medium	1	Protein argonaute-3
AGR2	O95994	10	1	1	1	175	20	9	2.63	1	0	High	1	Anterior gradient protein 2 homolog
AGRA2	Q96PE1	1	1	1	1	1338	142.6	8.44	0	1	0	Medium	1	Adhesion G protein-coupled receptor A2
AGRA3	Q8IWK6	1	1	2	1	1321	146.1	8.48	0	1	0	Medium	1	Adhesion G protein-coupled receptor A3
AGRB3	O60242	2	2	2	2	1522	171.4	7.06	0	2	0	Medium	1	Adhesion G protein-coupled receptor B3
AGRE5	P48960	2	1	1	1	835	91.8	6.87	2.03	1	0	High	1	CD97 antigen
AGRG3	Q86Y34	2	1	1	1	549	60.8	8.72	0	1	0	Medium	1	Adhesion G protein-coupled receptor G3
AGRG4	Q8IZF6	1	2	2	2	3080	333.2	6.21	1.71	2	0	Medium	1	Adhesion G-protein coupled receptor G4
AGRL1	O94910	1	1	1	1	1474	162.6	6.6	0	1	0	Medium	1	Adhesion G protein-coupled receptor L1
AGRP	O00253	12	1	1	1	132	14.4	7.44	0	1	0	Medium	1	Agouti-related protein
AGRV1	Q8WXG9	0	3	3	2	6306	692.6	4.64	0	3	0	Medium	1	G-protein coupled receptor 98
AGT2	Q9BYV1	7	1	1	1	514	57.1	7.87	0	1	0	Medium	1	\Alanine--glyoxylate aminotransferase 2, mitochondrial\""
AHSA1	O95433	5	2	2	2	338	38.3	5.53	0	2	0	Medium	1	Activator of 90 kDa heat shock protein ATPase homolog 1
AIMP1	Q12904	4	1	1	1	312	34.3	8.43	2.02	1	0	High	1	Aminoacyl tRNA synthase complex-interacting multifunctional protein 1
AIMP2	Q13155	5	1	1	1	320	35.3	8.22	0	1	0	Medium	1	Aminoacyl tRNA synthase complex-interacting multifunctional protein 2
AINX	Q16352	5	2	2	2	499	55.4	5.4	0	2	0	Medium	1	Alpha-internexin
AJM1	C9J069	3	3	3	3	976	106.6	9.03	0	3	0	Medium	1	Uncharacterized protein C9orf172
AKA10	O43572	1	1	1	1	662	73.8	6.39	0	1	0	Medium	1	\A-kinase anchor protein 10, mitochondrial\""
AKA12	Q02952	2	2	3	2	1782	191.4	4.41	0	2	0	Medium	1	A-kinase anchor protein 12
AKAP1	Q92667	4	3	3	3	903	97.3	4.94	4.11	3	0	High	1	\A-kinase anchor protein 1, mitochondrial\""
AKAP6	Q13023	1	2	2	2	2319	256.6	5.01	0	2	0	Medium	1	A-kinase anchor protein 6
AKAP8	O43823	4	4	4	3	692	76.1	5.15	3.63	4	0	Medium	1	A-kinase anchor protein 8
AKAP9	Q99996	1	4	4	2	3907	452.7	4.98	0	4	0	Medium	1	A-kinase anchor protein 9
AKIP1	Q9NQ31	9	2	2	2	210	23.1	8.16	0	2	0	Medium	1	A-kinase-interacting protein 1
AKNA	Q7Z591	1	1	1	1	1439	155	6.32	0	1	0	Medium	1	AT-hook-containing transcription factor
AKP13	Q12802	1	3	3	3	2813	307.4	5.24	1.66	3	0	Medium	1	A-kinase anchor protein 13
AKT1	P31749	4	1	1	1	480	55.7	6.07	0	1	0	Medium	1	RAC-beta serine/threonine-protein kinase
AL5AP	P20292	7	1	1	1	161	18.1	8.44	0	1	0	Medium	1	Arachidonate 5-lipoxygenase-activating protein
AL7A1	P49419	13	5	6	5	539	58.5	7.99	6.32	5	0	High	1	Alpha-aminoadipic semialdehyde dehydrogenase
ALKB1	Q13686	5	2	2	2	389	43.8	7.08	0	2	0	Medium	1	DNA demethylase ALKBH1
ALMS1	Q8TCU4	0	2	2	1	4168	460.8	6.28	0	2	0	Medium	1	Alstrom syndrome protein 1
ALPK2	Q86TB3	0	1	1	1	2170	236.9	5.24	1.65	1	0	Medium	1	Alpha-protein kinase 2
ALS2	Q96Q42	2	3	3	3	1657	183.5	6.27	0	3	0	Medium	1	Alsin
AMACR	Q9UHK6	3	1	1	1	382	42.4	6.44	0	1	0	Medium	1	Alpha-methylacyl-CoA racemase
AMER2	Q8N7J2	3	2	3	2	671	69.5	6.99	3.5	2	0	Medium	1	APC membrane recruitment protein 2
AMOL2	Q9Y2J4	2	2	2	2	779	85.7	7.3	0	2	0	Medium	1	Angiomotin-like protein 2
AMOT	Q4VCS5	1	1	1	1	1084	118	7.64	0	1	0	Medium	1	Angiomotin
AMPB	Q9H4A4	11	6	6	6	650	72.5	5.74	8.15	6	0	High	1	Aminopeptidase B
AMPQ	Q6Q4G3	2	2	2	1	990	113.2	5.63	0	2	0	Medium	1	Aminopeptidase Q
AMRA1	Q9C0C7	1	1	1	1	1298	142.4	7.18	0	1	0	Medium	1	Activating molecule in BECN1-regulated autophagy protein 1
AN30B	Q9BXX2	2	2	2	1	1392	158	6.35	1.92	2	0	Medium	1	Ankyrin repeat domain-containing protein 30B
AN32A	P39687	5	1	1	1	249	28.6	4.09	3.05	1	0	High	1	Acidic leucine-rich nuclear phosphoprotein 32 family member A
AN36B	Q8N2N9	1	2	2	2	1353	153.5	8.85	0	2	0	Medium	1	Ankyrin repeat domain-containing protein 36B
ANGL6	Q8NI99	3	1	1	1	470	51.7	8.53	0	1	0	Medium	1	Angiopoietin-related protein 6
ANK3	Q12955	0	1	2	1	4377	480.1	6.49	0	1	0	Medium	1	Ankyrin-3
ANKR1	Q15327	4	2	2	1	319	36.2	7.5	0	2	0	Medium	1	Ankyrin repeat domain-containing protein 1
ANM8	Q9NR22	6	2	2	1	394	45.3	6.93	2.04	2	0	Medium	1	Protein arginine N-methyltransferase 1
ANO5	Q75V66	2	2	2	2	913	107.1	6.8	0	2	0	Medium	1	Anoctamin-5
ANR11	Q6UB99	1	3	3	3	2663	297.7	7.11	0	3	0	Medium	1	Ankyrin repeat domain-containing protein 11
ANR17	O75179	2	6	6	5	2603	274.1	6.52	6.13	6	0	High	1	Ankyrin repeat domain-containing protein 17
ANR23	Q86SG2	4	1	1	1	305	34.3	9.45	0	1	0	Medium	1	Ankyrin repeat domain-containing protein 23
ANR35	Q8N283	1	2	2	1	1001	109.9	6.02	3.91	2	0	High	1	Ankyrin repeat domain-containing protein 35
ANR62	A6NC57	1	1	1	1	917	106.4	6.67	0	1	0	Medium	1	Ankyrin repeat domain-containing protein 62
ANT3	P01008	2	1	1	1	464	52.6	6.71	0	1	0	Medium	1	Antithrombin-III
ANTR2	P58335	3	1	1	1	489	53.6	7.46	2.12	1	0	Medium	1	Anthrax toxin receptor 2
ANXA1	P04083	15	4	4	3	346	38.7	7.02	11.05	4	0	High	1	Annexin A1
ANXA6	P08133	14	9	10	8	673	75.8	5.6	14.85	9	0	High	1	Annexin A6
AOC3	Q16853	2	1	1	1	763	84.6	6.52	0	1	0	Medium	1	Membrane primary amine oxidase
AP1M2	Q9Y6Q5	4	2	2	2	423	48.1	8.22	1.84	2	0	Medium	1	AP-1 complex subunit mu-2
AP2B	Q92481	2	1	1	1	460	50.4	8.24	0	1	0	Medium	1	Transcription factor AP-2-beta
AP2B1	P63010	11	10	12	3	937	104.5	5.38	16.43	10	0	Medium	1	AP-2 complex subunit beta
AP2S1	P53680	5	1	1	1	142	17	6.18	1.7	1	0	Medium	1	AP-2 complex subunit sigma
AP3D1	O14617	3	3	3	3	1153	130.1	8.48	3.67	3	0	High	1	AP-3 complex subunit delta-1
APBA2	Q99767	2	1	1	1	749	82.5	4.86	0	1	0	Medium	1	Amyloid beta A4 precursor protein-binding family A member 2
APC7	Q9UJX3	3	2	2	2	565	63.1	5.72	1.99	2	0	High	1	Anaphase-promoting complex subunit 7
APMAP	Q9HDC9	3	1	1	1	416	46.5	6.16	0	1	0	Medium	1	Adipocyte plasma membrane-associated protein
APOA4	P06727	3	2	2	1	396	45.3	5.38	1.83	2	0	Medium	1	Apolipoprotein A-IV
APOA5	Q6Q788	2	1	1	1	366	41.2	6.43	0	1	0	Medium	1	Apolipoprotein A-V
APOL5	Q9BWW9	4	2	2	2	433	47	9.31	0	2	0	Medium	1	Apolipoprotein L5
APT	P07741	5	1	1	1	180	19.6	6.02	0	1	0	Medium	1	Adenine phosphoribosyltransferase
ARAF	P10398	1	1	1	1	606	67.5	9.01	0	1	0	Medium	1	Serine/threonine-protein kinase A-Raf
ARAP3	Q8WWN8	1	1	1	1	1544	169.7	7.08	0	1	0	Medium	1	\Arf-GAP with Rho-GAP domain, ANK repeat and PH domain-containing protein 3\""
ARC1B	O15143	5	2	2	2	372	40.9	8.35	0	2	0	Medium	1	Actin-related protein 2/3 complex subunit 1B
ARF	Q8N726	18	1	1	1	132	13.9	12.41	0	1	0	Medium	1	Cyclin-dependent kinase inhibitor 2A
ARF3	P61204	29	5	5	3	181	20.6	7.43	6.13	5	0	High	1	ADP-ribosylation factor 1
ARF4	P18085	23	5	5	3	180	20.5	7.14	11.35	5	0	High	1	ADP-ribosylation factor 4
ARF6	P62330	10	2	2	1	175	20.1	8.95	4.15	2	0	High	1	ADP-ribosylation factor 6
ARFG2	Q8N6H7	5	2	2	2	521	56.7	7.99	1.6	2	0	Medium	1	ADP-ribosylation factor GTPase-activating protein 2
ARG28	Q8N1W1	0	1	2	1	1705	191.8	6.04	0	1	0	Medium	1	Rho guanine nucleotide exchange factor 28
ARGI1	P05089	4	2	2	2	322	34.7	7.21	0	2	0	Medium	1	Arginase-1
ARGL1	Q9NWB6	2	1	1	1	273	33.2	10.35	1.67	1	0	Medium	1	Arginine and glutamate-rich protein 1
ARH40	Q8TER5	1	2	2	2	1519	164.6	6.15	0	2	0	Medium	1	Rho guanine nucleotide exchange factor 40
ARHG1	Q92888	4	3	3	3	912	102.4	5.66	2.34	3	0	High	1	Rho guanine nucleotide exchange factor 1
ARHGB	O15085	1	2	6	2	1522	167.6	5.5	0	2	0	Medium	1	Rho guanine nucleotide exchange factor 11
ARHGI	Q6ZSZ5	1	1	1	1	1361	151.5	6.33	0	1	0	Medium	1	Rho guanine nucleotide exchange factor 18
ARHGJ	Q8IW93	2	1	1	1	802	89.1	7.53	0	1	0	Medium	1	Rho guanine nucleotide exchange factor 19
ARI1	Q9Y4X5	1	1	1	1	557	64.1	5.08	0	1	0	Medium	1	E3 ubiquitin-protein ligase ARIH1
ARI1A	O14497	1	2	2	1	2285	241.9	6.7	2.01	2	0	Medium	1	AT-rich interactive domain-containing protein 1A
ARI1B	Q8NFD5	1	2	3	2	2319	243.8	6.9	1.71	2	0	Medium	1	AT-rich interactive domain-containing protein 1B
ARI4A	P29374	2	1	1	1	1257	142.7	5.1	0	1	0	Medium	1	AT-rich interactive domain-containing protein 4A
ARIP4	Q9Y4B4	1	2	2	2	1467	162.7	6.09	0	2	0	Medium	1	Helicase ARIP4
ARL8A	Q96BM9	5	1	1	1	186	21.4	7.77	2.48	1	0	High	1	ADP-ribosylation factor-like protein 8A
ARMC1	Q9NVT9	4	1	1	1	282	31.3	5.74	0	1	0	Medium	1	Armadillo repeat-containing protein 1
ARMC3	Q5W041	2	2	2	2	872	96.3	6.21	0	2	0	Medium	1	Armadillo repeat-containing protein 3
ARMX1	Q9P291	4	1	1	1	453	49.2	9.22	0	1	0	Medium	1	Armadillo repeat-containing X-linked protein 1
ARP2	P61160	7	3	4	2	394	44.7	6.74	6.04	3	0	High	1	Actin-related protein 2
ARPC2	O15144	15	5	7	5	300	34.3	7.36	14.03	5	0	High	1	Actin-related protein 2/3 complex subunit 2
ARY2	P11245	3	1	4	1	290	33.5	5.86	0	1	0	Medium	1	Arylamine N-acetyltransferase 2
ASB17	Q8WXJ9	8	1	1	1	295	34.3	8.79	0	1	0	Medium	1	Ankyrin repeat and SOCS box protein 17
ASH2L	Q9UBL3	4	2	2	2	628	68.7	5.69	0	2	0	Medium	1	Set1/Ash2 histone methyltransferase complex subunit ASH2
ASM3A	Q92484	2	1	1	1	453	51.2	6.33	0	1	0	Medium	1	Acid sphingomyelinase-like phosphodiesterase 3a
ASM3B	Q92485	10	4	4	4	455	50.8	5.64	7.04	4	0	High	1	Acid sphingomyelinase-like phosphodiesterase 3b
ASNS	P08243	8	5	5	5	561	64.3	6.86	6.16	5	0	High	1	Asparagine synthetase [glutamine-hydrolyzing]
ASPH	Q12797	5	3	3	2	758	85.8	5.01	6.11	3	0	High	1	Aspartate beta-hydroxylase domain-containing protein 2
ASPP2	Q13625	2	2	2	2	1128	125.5	6.07	0	2	0	Medium	1	Apoptosis-stimulating of p53 protein 2
ASTN2	O75129	0	1	1	1	1339	148.1	5.97	0	1	0	Medium	1	Astrotactin-2
ASXL1	Q8IXJ9	1	2	2	2	1541	165.3	6.21	0	2	0	Medium	1	Putative Polycomb group protein ASXL1
AT11B	Q9Y2G3	2	1	1	1	1177	134.1	6.96	0	1	0	Medium	1	Probable phospholipid-transporting ATPase IF
AT12A	P54707	7	7	8	2	1039	115.4	6.55	10.54	7	0	Medium	1	Potassium-transporting ATPase alpha chain 2
AT131	Q9HD20	1	1	1	1	1204	132.9	8.13	2.22	1	0	High	1	Manganese-transporting ATPase 13A1
AT1A4	Q13733	8	9	11	1	1029	114.1	6.64	18.78	9	0	Medium	1	Sodium/potassium-transporting ATPase subunit alpha-2
AT1B1	P05026	30	8	11	8	303	35	8.53	19.1	8	0	High	1	Sodium/potassium-transporting ATPase subunit beta-1
AT1B3	P54709	9	2	2	2	279	31.5	8.35	4.72	2	0	High	1	Sodium/potassium-transporting ATPase subunit beta-3
AT5F1	P24539	9	2	2	2	256	28.9	9.36	0	2	0	Medium	1	\ATP synthase F(0) complex subunit B1, mitochondrial\""
AT8A1	Q9Y2Q0	1	1	1	1	1164	131.3	6.84	0	1	0	Medium	1	Phospholipid-transporting ATPase IA
ATAD1	Q8NBU5	9	3	3	3	361	40.7	6.9	0	3	0	Medium	1	ATPase family AAA domain-containing protein 1
ATD2B	Q9ULI0	1	1	1	1	1458	164.8	6.84	0	1	0	Medium	1	ATPase family AAA domain-containing protein 2B
ATD3A	Q9NVI7	12	9	9	2	634	71.3	8.98	11.63	9	0	Medium	1	ATPase family AAA domain-containing protein 3A
ATF6B	Q99941	5	3	3	2	703	76.7	6.27	0	3	0	Medium	1	Cyclic AMP-dependent transcription factor ATF-6 beta
ATG10	Q9H0Y0	3	1	1	1	220	25.3	5.55	0	1	0	Medium	1	Ubiquitin-like-conjugating enzyme ATG10
ATLA3	Q6DD88	2	1	1	1	541	60.5	5.66	1.66	1	0	Medium	1	Atlastin-3
ATM	Q13315	0	1	1	1	3056	350.5	6.81	0	1	0	Medium	1	Serine-protein kinase ATM
ATMIN	O43313	1	1	1	1	823	88.3	5.16	0	1	0	Medium	1	ATM interactor
ATN1	P54259	3	3	3	3	1190	125.3	8.98	0	3	0	Medium	1	Atrophin-1
ATOSA	Q32MH5	2	2	2	2	1076	121.6	7.9	0	2	0	Medium	1	Protein FAM214A
ATP5H	O75947	20	3	4	3	161	18.5	5.3	5.92	3	0	High	1	\ATP synthase subunit d, mitochondrial\""
ATP5I	P56385	14	1	1	1	69	7.9	9.35	0	1	0	Medium	1	Myosin light chain 5
ATP5J	P18859	6	1	1	1	108	12.6	9.52	1.81	1	0	Medium	1	\ATP synthase-coupling factor 6, mitochondrial\""
ATP6	P00846	7	2	2	2	226	24.8	10.1	2.38	2	0	High	1	ATP synthase subunit a
ATPD	P30049	5	1	1	1	168	17.5	5.49	0	1	0	Medium	1	\ATP synthase subunit delta, mitochondrial\""
ATPG	P36542	7	2	2	2	298	33	9.22	3.49	2	0	High	1	\ATP synthase subunit gamma, mitochondrial\""
ATPMK	Q96IX5	28	1	1	1	58	6.5	9.76	2.5	1	0	High	1	Up-regulated during skeletal muscle growth protein 5
ATR	Q13535	1	4	4	4	2644	301.2	7.43	0	4	0	Medium	1	Serine/threonine-protein kinase ATR
ATRAP	Q6RW13	6	1	1	1	159	17.4	6.14	0	1	0	Medium	1	Type-1 angiotensin II receptor-associated protein
ATRN1	Q5VV63	0	1	1	1	1379	152.5	7.31	0	1	0	Medium	1	Attractin-like protein 1
ATRX	P46100	1	2	2	2	2492	282.4	6.55	0	2	0	Medium	1	Transcriptional regulator ATRX
ATS14	Q8WXS8	1	2	2	1	1223	133.8	7.18	1.76	2	0	Medium	1	A disintegrin and metalloproteinase with thrombospondin motifs 14
ATS18	Q8TE60	1	1	1	1	1221	135.1	8.54	0	1	0	Medium	1	A disintegrin and metalloproteinase with thrombospondin motifs 18
ATS5	Q9UNA0	1	1	1	1	930	101.7	8.85	0	1	0	Medium	1	A disintegrin and metalloproteinase with thrombospondin motifs 5
AUP1	Q9Y679	2	1	1	1	410	45.8	8.65	0	1	0	Medium	1	Ancient ubiquitous protein 1
AVIL	O75366	2	2	2	1	819	92	5.71	0	2	0	Medium	1	Advillin
B2L12	Q9HB09	3	1	1	1	334	36.8	9.22	0	1	0	Medium	1	Bcl-2-like protein 12
B3A3	P48751	1	1	1	1	1232	135.7	6.44	0	1	0	Medium	1	Anion exchange protein 3
B3GN5	Q9BYG0	2	1	7	1	378	44	7.9	0	1	0	Medium	1	\Lactosylceramide 1,3-N-acetyl-beta-D-glucosaminyltransferase\""
B4GT1	P15291	3	1	1	1	398	43.9	8.65	0	1	0	Medium	1	\Beta-1,4-galactosyltransferase 1\""
BABA2	Q9NXR7	3	1	1	1	383	43.5	5.81	0	1	0	Medium	1	BRCA1-A complex subunit BRE
BACH1	O14867	2	1	1	1	736	81.9	5.05	0	1	0	Medium	1	Transcription regulator protein BACH1
BACHL	Q6ZUV0	5	1	1	1	252	28.1	7.15	0	1	0	Medium	1	Putative cytosolic acyl coenzyme A thioester hydrolase-like
BAF	O75531	8	1	1	1	89	10.1	6.09	0	1	0	Medium	1	Barrier-to-autointegration factor
BAG2	O95816	5	1	1	1	211	23.8	6.7	2.21	1	0	High	1	BAG family molecular chaperone regulator 2
BANP	Q8N9N5	2	1	1	1	519	56.5	5.49	0	1	0	Medium	1	Protein BANP
BAP1	Q92560	2	1	1	1	729	80.3	6.84	0	1	0	Medium	1	Ubiquitin carboxyl-terminal hydrolase BAP1
BATF2	Q8N1L9	9	3	3	3	274	29.4	7.55	1.75	3	0	Medium	1	Basic leucine zipper transcriptional factor ATF-like 2
BBOF1	Q8ND07	2	2	2	1	529	61.9	9.04	1.79	2	0	Medium	1	Basal body-orientation factor 1
BCD1	Q9NWK9	4	1	1	1	470	53.9	5.8	0	1	0	Medium	1	Box C/D snoRNA protein 1
BGAL	P16278	2	1	1	1	677	76	6.57	1.85	1	0	Medium	1	Beta-galactosidase
BI2L2	Q6UXY1	2	1	1	1	529	59	9.51	0	1	0	Medium	1	Brain-specific angiogenesis inhibitor 1-associated protein 2-like protein 2
BICC1	Q9H694	3	1	1	1	974	104.8	8.54	0	1	0	Medium	1	Protein bicaudal C homolog 1
BLT3B	A0JNW5	2	3	3	3	1464	164.1	6.32	0	3	0	Medium	1	UHRF1-binding protein 1-like
BLTP1	Q2LD37	0	1	1	1	5005	555.1	6.58	0	1	0	Medium	1	Uncharacterized protein KIAA1109
BMAL1	O00327	2	1	2	1	626	68.7	6.86	0	1	0	Medium	1	Aryl hydrocarbon receptor nuclear translocator-like protein 2
BMPR2	Q13873	1	1	1	1	1038	115.1	6.2	0	1	0	Medium	1	Bone morphogenetic protein receptor type-2
BMX	P51813	1	1	1	1	675	78	8.5	0	1	0	Medium	1	Cytoplasmic tyrosine-protein kinase BMX
BNIP5	P0C671	3	1	1	1	652	71.9	8.47	0	1	0	Medium	1	Uncharacterized protein C6orf222
BPTF	Q12830	1	2	2	2	3046	338.1	6.54	0	2	0	Medium	1	Nucleosome-remodeling factor subunit BPTF
BROMI	Q96NH3	1	3	3	2	1257	144.7	6.74	1.77	3	0	Medium	1	Protein broad-minded
BRWD3	Q6RI45	1	3	3	1	1802	203.5	7.84	0	3	0	Medium	1	Bromodomain and WD repeat-containing protein 3
BSPRY	Q5W0U4	6	3	3	2	402	44.4	6.42	2.14	3	0	High	1	B box and SPRY domain-containing protein
BST2	Q10589	8	1	1	1	180	19.8	5.6	3.1	1	0	High	1	Bone marrow stromal antigen 2
BTBD8	Q5XKL5	3	4	4	4	1792	198.9	6.15	0	4	0	Medium	1	Uncharacterized protein KIAA1107
BTBD9	Q96Q07	3	1	1	1	612	69.1	5.77	0	1	0	Medium	1	BTB/POZ domain-containing protein 9
BTBDA	Q9BSF8	1	1	1	1	475	53.7	7.77	0	1	0	Medium	1	BTB/POZ domain-containing protein 10
BTBDG	Q32M84	5	2	2	2	506	58.4	9.2	0	2	0	Medium	1	BTB/POZ domain-containing protein 16
BTF3	P20290	6	2	2	2	206	22.2	9.38	1.81	2	0	Medium	1	Transcription factor BTF3
BUB1	O43683	1	2	2	1	1085	122.3	6.47	0	2	0	Medium	1	Mitotic checkpoint serine/threonine-protein kinase BUB1
C11B1	P15538	2	1	1	1	503	57.5	9.32	0	1	0	Medium	1	\Cytochrome P450 11B2, mitochondrial\""
C11B2	P19099	2	1	1	1	503	57.5	9.39	0	1	0	Medium	1	\Cytochrome P450 11B2, mitochondrial\""
C144A	A2RUR9	1	2	2	2	1427	165	5.36	0	2	0	Medium	1	Coiled-coil domain-containing protein 144A
C170B	Q9Y4F5	1	2	2	2	1589	171.6	6.84	0	2	0	Medium	1	Centrosomal protein of 170 kDa protein B
C19L1	Q69YN2	4	2	2	2	538	60.6	7.24	2.04	2	0	Medium	1	CWF19-like protein 1
C1QL4	Q86Z23	4	1	1	1	238	24.9	8.28	0	1	0	Medium	1	Complement C1q-like protein 4
C27C1	Q4G0S4	2	2	9	1	542	60.9	9.76	0	2	0	Medium	1	Cytochrome P450 27C1
C2D2A	Q9P2K1	2	2	2	2	1620	186.1	6.74	0	2	0	Medium	1	Coiled-coil and C2 domain-containing protein 2A
C2D2B	Q6DHV5	1	2	2	2	1437	166.7	6.99	0	2	0	Medium	1	Coiled-coil and C2 domain-containing protein 2A
C99L2	Q8TCZ2	3	1	1	1	262	28	5.14	0	1	0	Medium	1	CD99 antigen-like protein 2
CA141	Q5JVX7	3	1	1	1	400	46.1	9.69	0	1	0	Medium	1	Uncharacterized protein C1orf141
CA167	Q5SNV9	1	1	1	1	1468	162.3	10.7	0	1	0	Medium	1	Uncharacterized protein C1orf167
CA198	Q9H425	3	1	2	1	327	36.3	5.72	0	1	0	Medium	1	Uncharacterized protein C1orf198
CA2D4	Q7Z3S7	2	1	1	1	1137	127.9	5.35	0	1	0	Medium	1	Voltage-dependent calcium channel subunit alpha-2/delta-4
CA5BL	Q8WTZ4	10	3	3	3	195	22.6	10.76	0	3	0	Medium	1	Putative inactive carbonic anhydrase 5B-like protein
CABIN	Q9Y6J0	1	2	2	2	2220	246.2	6.02	0	2	0	Medium	1	Calcineurin-binding protein cabin-1
CAC1C	Q13936	1	2	2	2	2221	248.8	6.76	0	2	0	Medium	1	Voltage-dependent L-type calcium channel subunit alpha-1C
CACP	P43155	2	2	2	2	626	70.8	8.44	1.68	2	0	Medium	1	Carnitine O-acetyltransferase
CAD23	Q9H251	0	2	2	2	3354	369.3	4.67	0	2	0	Medium	1	Cadherin-23
CAD26	Q8IXH8	1	1	1	1	832	92.4	4.91	0	1	0	Medium	1	Cadherin-like protein 26
CADM2	Q8N3J6	3	1	1	1	435	47.5	5.33	0	1	0	Medium	1	Cell adhesion molecule 2
CAF1A	Q13111	1	1	1	1	956	106.8	5.94	0	1	0	Medium	1	Chromatin assembly factor 1 subunit A
CAHM1	Q8IU99	2	1	1	1	346	38.2	8.18	0	1	0	Medium	1	Calcium homeostasis modulator protein 1
CAHM2	Q9HA72	3	1	1	1	323	36.2	7.69	0	1	0	Medium	1	Calcium homeostasis modulator protein 2
CALB1	P05937	18	5	5	4	261	30	4.83	1.7	5	0	Medium	1	Calretinin
CALI	Q13939	5	2	2	2	588	66.5	8.18	0	2	0	Medium	1	Calicin
CALR	P27797	28	10	11	10	417	48.1	4.44	23.96	10	0	High	1	Calreticulin
CALU	O43852	11	3	3	3	315	37.1	4.64	1.93	3	0	High	1	Calumenin
CAMP1	Q5T5Y3	1	2	2	2	1602	177.9	6.73	0	2	0	Medium	1	Calmodulin-regulated spectrin-associated protein 1
CAN1	P07384	10	7	7	7	714	81.8	5.67	12.7	7	0	High	1	Calpain-1 catalytic subunit
CAN15	O75808	1	1	1	1	1086	117.2	6.71	0	1	0	Medium	1	Calpain-15
CAN2	P17655	6	4	4	4	700	79.9	4.98	6.14	4	0	High	1	Calpain-1 catalytic subunit
CAPON	O75052	4	1	1	1	506	56.1	6.3	0	1	0	Medium	1	Carboxyl-terminal PDZ ligand of neuronal nitric oxide synthase protein
CAR11	Q9BXL7	1	2	2	1	1154	133.2	6.09	0	2	0	Medium	1	Caspase recruitment domain-containing protein 11
CARD9	Q9H257	1	1	1	1	536	62.2	6.07	0	1	0	Medium	1	Caspase recruitment domain-containing protein 9
CARF	Q9NXV6	9	4	4	4	580	61.1	9.01	6.03	4	0	High	1	CDKN2A-interacting protein
CARL1	Q5VZK9	2	2	2	2	1371	151.5	7.85	1.8	2	0	Medium	1	F-actin-uncapping protein LRRC16A
CARM1	Q86X55	5	4	4	4	608	65.8	6.73	5.69	4	0	High	1	Histone-arginine methyltransferase CARM1
CARTF	Q8N187	1	1	1	1	725	80.6	5.69	2.17	1	0	High	1	Calcium-responsive transcription factor
CASC3	O15234	1	1	1	1	703	76.2	6.48	0	1	0	Medium	1	Protein CASC3
CASP	Q13948	4	3	3	2	678	77.4	5.44	0	3	0	Medium	1	Homeobox protein cut-like 1
CASS4	Q9NQ75	3	2	2	2	786	87.1	7.08	0	2	0	Medium	1	Cas scaffolding protein family member 4
CATD	P07339	2	1	1	1	412	44.5	6.54	0	1	0	Medium	1	Cathepsin D
CATG	P08311	3	1	1	1	255	28.8	11.19	0	1	0	Medium	1	Cathepsin G
CAV1	Q03135	4	1	1	1	178	20.5	6.02	0	1	0	Medium	1	Caveolin-1
CAZA1	P52907	37	8	9	5	286	32.9	5.69	14.86	8	0	High	1	F-actin-capping protein subunit alpha-1
CAZA2	P47755	12	4	4	1	286	32.9	5.85	4.39	4	0	High	1	F-actin-capping protein subunit alpha-2
CB015	Q8WU43	14	1	1	1	91	10	5.45	0	1	0	Medium	1	Uncharacterized protein C2orf15
CB016	Q68DN1	1	2	2	2	1984	224.2	10.08	0	2	0	Medium	1	Uncharacterized protein C2orf16
CBLB	Q13191	1	1	1	1	982	109.4	7.88	0	1	0	Medium	1	E3 ubiquitin-protein ligase CBL-B
CBP	Q92793	1	2	2	2	2442	265.2	8.53	0	2	0	Medium	1	CREB-binding protein
CBS	P35520	2	2	3	1	551	60.5	6.65	0	2	0	Medium	1	Cystathionine beta-synthase
CC020	Q8ND61	2	2	2	1	904	101.2	9.13	1.72	2	0	Medium	1	Uncharacterized protein C3orf20
CC113	Q9H0I3	3	2	2	1	377	44.2	8.73	0	2	0	Medium	1	Coiled-coil domain-containing protein 113
CC124	Q96CT7	3	1	1	1	223	25.8	9.54	0	1	0	Medium	1	Coiled-coil domain-containing protein 124
CC136	Q96JN2	1	1	1	1	1154	134	4.65	0	1	0	Medium	1	Coiled-coil domain-containing protein 136
CC137	Q6PK04	7	2	2	2	289	33.2	10.93	0	2	0	Medium	1	Coiled-coil domain-containing protein 137
CC140	Q96MF4	6	1	1	1	163	18.2	10.64	0	1	0	Medium	1	Coiled-coil domain-containing protein 140
CC170	Q8IYT3	2	1	1	1	715	82.2	6.64	0	1	0	Medium	1	Coiled-coil domain-containing protein 170
CC180	Q9P1Z9	1	2	2	2	1701	197.2	6.04	1.84	2	0	Medium	1	Coiled-coil domain-containing protein 180
CC185	Q8N715	1	1	1	1	623	72.3	10.11	0	1	0	Medium	1	Coiled-coil domain-containing protein 185
CC197	Q8NCU1	7	1	1	1	143	16.1	6.54	0	1	0	Medium	1	Putative uncharacterized protein encoded by LINC00521
CC50A	Q9NV96	11	4	4	4	361	40.7	8.59	4.59	4	0	High	1	Cell cycle control protein 50A
CC92B	A0A8I5KY20	7	2	2	1	255	28.6	9.77	0	2	0	Medium	1	Protein GVQW1
CCD13	Q8IYE1	3	2	2	2	715	80.8	8.84	0	2	0	Medium	1	Coiled-coil domain-containing protein 13
CCD24	Q8N4L8	4	1	1	1	307	34.3	7.02	0	1	0	Medium	1	Coiled-coil domain-containing protein 24
CCD38	Q502W7	4	2	2	2	563	65.3	8.75	0	2	0	Medium	1	Cilia- and flagella-associated protein 100
CCD47	Q96A33	13	5	5	5	483	55.8	4.87	4.72	5	0	High	1	Coiled-coil domain-containing protein 47
CCD71	Q8IV32	4	2	2	2	467	49.6	11.8	0	2	0	Medium	1	Coiled-coil domain-containing protein 71
CCD86	Q9H6F5	4	1	1	1	360	40.2	10.33	1.62	1	0	Medium	1	Coiled-coil domain-containing protein 86
CCD93	Q567U6	6	1	1	1	631	73.2	8.15	0	1	0	Medium	1	Coiled-coil domain-containing protein 93
CCD9B	Q6ZUT6	5	2	2	2	534	57.3	9.13	0	2	0	Medium	1	Uncharacterized protein C15orf52
CCDC7	Q96M83	1	1	1	1	1385	157.4	7.58	0	1	0	Medium	1	.
CCER2	I3L3R5	8	2	2	2	266	30.3	5.3	0	2	0	Medium	1	Coiled-coil domain-containing glutamate-rich protein 2
CCG2	Q9Y698	8	1	1	1	323	35.9	8.98	0	1	0	Medium	1	Voltage-dependent calcium channel gamma-2 subunit
CCNB3	Q8WWL7	1	1	1	1	1395	157.8	6.68	0	1	0	Medium	1	G2/mitotic-specific cyclin-B3
CCNL1	Q9UK58	2	1	1	1	526	59.6	10.7	0	1	0	Medium	1	Cyclin-L2
CCSE1	Q9C0I3	1	1	1	1	900	99.4	7.83	0	1	0	Medium	1	Serine-rich coiled-coil domain-containing protein 1
CCSE2	Q9H7U1	5	3	3	3	834	93.5	6.87	0	3	0	Medium	1	Serine-rich coiled-coil domain-containing protein 2
CD166	Q13740	8	4	4	4	583	65.1	6.25	3.95	4	0	High	1	CD166 antigen
CD27	P26842	8	1	1	1	260	29.1	7.64	0	1	0	Medium	1	CD27 antigen
CD37	P11049	4	1	1	1	281	31.7	7.94	0	1	0	Medium	1	Leukocyte antigen CD37
CD44	P16070	3	1	1	1	742	81.5	5.33	0	1	0	Medium	1	CD44 antigen
CD47	Q08722	12	5	5	5	323	35.2	7.21	9.95	5	0	High	1	Leukocyte surface antigen CD47
CD53	P19397	5	1	1	1	219	24.3	7.52	0	1	0	Medium	1	Leukocyte surface antigen CD53
CD63	P08962	12	4	5	4	238	25.6	7.81	6.22	4	0	High	1	CD63 antigen
CD9	P21926	4	1	2	1	228	25.4	7.15	5.04	1	0	High	1	CD9 antigen
CDAN1	Q8IWY9	2	2	2	2	1227	134	6.77	0	2	0	Medium	1	Codanin-1
CDC27	P30260	1	1	1	1	824	91.8	7.02	0	1	0	Medium	1	Cell division cycle protein 27 homolog
CDCA3	Q99618	3	1	1	1	268	29	6.43	0	1	0	Medium	1	Cell division cycle-associated protein 3
CDCP1	Q9H5V8	3	2	2	2	836	92.9	7.96	0	2	0	Medium	1	CUB domain-containing protein 1
CDK13	Q14004	2	2	2	1	1512	164.8	9.69	2.43	2	0	Medium	1	Cyclin-dependent kinase 13
CDKL1	Q00532	2	1	1	1	358	41.8	8.85	0	1	0	Medium	1	Cyclin-dependent kinase-like 1
CDN2A	P42771	3	1	1	1	156	16.5	5.81	0	1	0	Medium	1	Cyclin-dependent kinase inhibitor 2A
CDN2C	P42773	4	1	1	1	168	18.1	6.52	0	1	0	Medium	1	Cyclin-dependent kinase 4 inhibitor C
CDN2D	P55273	13	2	2	2	166	17.7	6.13	0	2	0	Medium	1	Cyclin-dependent kinase 4 inhibitor D
CDV3	Q9UKY7	6	2	2	2	258	27.3	6.4	1.72	2	0	Medium	1	Protein CDV3 homolog
CDYL	Q9Y232	5	2	3	2	598	66.4	9.45	0	2	0	Medium	1	Chromodomain Y-like protein
CE034	Q96MH7	2	1	1	1	638	72.8	7.93	0	1	0	Medium	1	Uncharacterized protein C5orf34
CE164	Q9UPV0	1	2	2	2	1460	164.2	5.36	0	2	0	Medium	1	Centrosomal protein of 164 kDa
CE192	Q8TEP8	1	2	2	1	2537	278.9	5.48	1.65	2	0	Medium	1	Centrosomal protein of 192 kDa
CEAM3	P40198	4	1	1	1	252	27.1	6.62	0	1	0	Medium	1	Carcinoembryonic antigen-related cell adhesion molecule 6
CEAM7	Q14002	3	1	1	1	265	29.3	5.54	2.25	1	0	High	1	Carcinoembryonic antigen-related cell adhesion molecule 7
CEBPZ	Q03701	1	1	1	1	1054	120.9	5.94	0	1	0	Medium	1	CCAAT/enhancer-binding protein zeta
CEFIP	Q711Q0	1	1	1	1	1435	156.4	6.38	0	1	0	Medium	1	Uncharacterized protein C10orf71
CEIP2	Q9UHN6	1	1	1	1	1383	154.3	8.15	0	1	0	Medium	1	Transmembrane protein 2
CELF1	Q92879	2	1	1	1	486	52	8.46	0	1	0	Medium	1	CUGBP Elav-like family member 1
CELF2	O95319	3	1	1	1	508	54.3	8.76	0	1	0	Medium	1	CUGBP Elav-like family member 2
CEMIP	Q8WUJ3	1	1	1	1	1361	152.9	7.85	0	1	0	Medium	1	Cell migration-inducing and hyaluronan-binding protein
CENPB	P07199	2	1	1	1	599	65.1	4.55	0	1	0	Medium	1	Major centromere autoantigen B
CENPU	Q71F23	3	1	1	1	418	47.5	9.13	0	1	0	Medium	1	Centromere protein U
CES1P	Q9UKY3	2	1	1	1	287	30.7	8.03	0	1	0	Medium	1	Putative inactive carboxylesterase 4
CF118	Q5T5N4	3	1	2	1	469	53.7	8.37	0	1	0	Medium	1	Uncharacterized protein C6orf118
CF206	Q8IYR0	5	1	1	1	622	71.1	6.84	0	1	0	Medium	1	Cilia- and flagella-associated protein 206
CF20D	Q6ZVT6	2	1	1	1	689	76.2	5.21	0	1	0	Medium	1	Uncharacterized protein C3orf67
CF210	Q0VFZ6	1	1	1	1	552	66.4	8.87	0	1	0	Medium	1	Coiled-coil domain-containing protein 173
CFA20	Q9Y6A4	10	2	2	2	193	22.8	9.76	0	2	0	Medium	1	Cilia- and flagella-associated protein 20
CFA46	Q8IYW2	2	6	6	5	2715	303.3	7.36	0	6	0	Medium	1	Cilia- and flagella-associated protein 46
CFA47	Q6ZTR5	1	2	2	2	3187	361.4	7.56	0	2	0	Medium	1	Cilia- and flagella-associated protein 47
CFA54	Q96N23	1	3	3	2	3096	351.7	8.1	0	3	0	Medium	1	Cilia- and flagella-associated protein 54
CFA65	Q6ZU64	1	2	2	2	1925	217.1	6.51	1.67	2	0	Medium	1	Cilia- and flagella-associated protein 65
CFA70	Q5T0N1	1	1	1	1	1121	125.6	5.81	0	1	0	Medium	1	Cilia- and flagella-associated protein 70
CFA74	Q9C0B2	1	2	2	1	1584	178.5	6.42	0	2	0	Medium	1	Cilia- and flagella-associated protein 74
CFA97	Q9P2B7	2	1	1	1	532	59.4	9.06	0	1	0	Medium	1	Cilia- and flagella-associated protein 97
CFA99	D6REC4	3	2	2	2	714	81.8	9.7	0	2	0	Medium	1	.
CFDP1	Q9UEE9	6	3	4	3	299	33.6	4.81	0	3	0	Medium	1	Craniofacial development protein 1
CFLAR	O15519	6	3	3	2	480	55.3	8	0	3	0	Medium	1	CASP8 and FADD-like apoptosis regulator
CGAS	Q8N884	3	2	2	2	522	58.8	9.48	1.6	2	0	Medium	1	Cyclic GMP-AMP synthase
CGBP1	Q9UFW8	9	1	1	1	167	18.8	8.95	0	1	0	Medium	1	CGG triplet repeat-binding protein 1
CGT	Q16880	1	1	1	1	541	61.4	9.52	1.8	1	0	Medium	1	2-hydroxyacylsphingosine 1-beta-galactosyltransferase
CH048	Q96LL4	4	1	1	1	319	36.8	8.66	0	1	0	Medium	1	Uncharacterized protein C8orf48
CHCH7	Q9BUK0	16	1	1	1	85	10.1	8.82	0	1	0	Medium	1	Coiled-coil-helix-coiled-coil-helix domain-containing protein 7
CHD2	O14647	1	2	2	1	1828	211.2	8.1	3.49	2	0	Medium	1	Chromodomain-helicase-DNA-binding protein 2
CHD7	Q9P2D1	0	2	2	2	2997	335.7	6.34	0	2	0	Medium	1	Chromodomain-helicase-DNA-binding protein 7
CHD8	Q9HCK8	1	2	2	2	2581	290.3	6.47	1.96	2	0	High	1	Chromodomain-helicase-DNA-binding protein 8
CHD9	Q3L8U1	1	2	2	2	2897	325.8	7.01	0	2	0	Medium	1	Chromodomain-helicase-DNA-binding protein 9
CHERP	Q8IWX8	3	3	3	3	916	103.6	9.04	1.92	3	0	High	1	Calcium homeostasis endoplasmic reticulum protein
CHIP	Q9UNE7	4	1	1	1	303	34.8	5.87	0	1	0	Medium	1	STIP1 homology and U box-containing protein 1
CHKA	P35790	2	1	1	1	457	52.2	6.55	0	1	0	Medium	1	Choline kinase alpha
CHM4B	Q9H444	10	2	2	2	224	24.9	4.82	2.09	2	0	High	1	Charged multivesicular body protein 4b
CHMP3	Q9Y3E7	5	1	1	1	222	25.1	5.12	0	1	0	Medium	1	Charged multivesicular body protein 3
CHP2	O43745	3	1	1	1	196	22.4	6.32	0	1	0	Medium	1	Calcineurin B homologous protein 2
CHPT1	Q8WUD6	6	2	2	2	406	45.1	6.92	0	2	0	Medium	1	Cholinephosphotransferase 1
CHSS1	Q86X52	1	1	1	1	802	91.7	9.23	0	1	0	Medium	1	Chondroitin sulfate synthase 1
CHSTA	O43529	5	2	2	2	356	42.2	8.03	0	2	0	Medium	1	Carbohydrate sulfotransferase 10
CI085	Q96MD7	8	1	1	1	179	20.2	9.42	0	1	0	Medium	1	Uncharacterized protein C9orf85
CI114	Q5T280	5	2	2	2	376	42	7.43	0	2	0	Medium	1	Putative methyltransferase C9orf114
CING	Q9P2M7	1	1	1	1	1203	137	5.52	0	1	0	Medium	1	Cingulin
CINP	Q9BW66	8	2	3	2	212	24.3	6.28	0	2	0	Medium	1	Zinc finger protein 839
CK098	E9PRG8	11	1	1	1	123	14.2	11.53	0	1	0	Medium	1	LBH domain-containing protein 1
CK5P2	Q96SN8	2	4	4	2	1893	214.9	5.58	1.76	4	0	Medium	1	CDK5 regulatory subunit-associated protein 2
CL033	Q8N6U2	7	1	1	1	182	18.4	11.05	1.65	1	0	Medium	1	Putative uncharacterized protein encoded by LINC00612
CL040	Q86WS4	4	2	3	2	652	74.5	7.93	0	2	0	Medium	1	Uncharacterized protein C12orf40
CL067	Q96M19	4	1	1	1	166	18.2	10.49	0	1	0	Medium	1	Lysine-rich nucleolar protein 1
CL079	G3V211	10	1	1	1	115	13.5	9.28	0	1	0	Medium	1	Uncharacterized protein encoded by LINC01619
CLAP2	O75122	1	1	1	1	1294	141	8.4	0	1	0	Medium	1	CLIP-associating protein 2
CLC2A	Q6UVW9	6	1	1	1	174	20	8.46	0	1	0	Medium	1	C-type lectin domain family 2 member A
CLC6A	Q6EIG7	6	1	1	1	209	24	6.27	0	1	0	Medium	1	C-type lectin domain family 6 member A
CLCA1	A8K7I4	2	2	3	2	914	100.2	6.37	0	2	0	Medium	1	Calcium-activated chloride channel regulator 1
CLCN6	P51797	1	1	1	1	869	97.2	6.81	0	1	0	Medium	1	Chloride transport protein 6
CLD6	P56747	7	1	1	1	220	23.3	8	1.94	1	0	High	1	Claudin-6
CLH2	P53675	9	14	16	2	1640	186.9	5.85	36.4	14	0	Medium	1	Clathrin heavy chain 2
CLIP1	P30622	2	3	3	3	1438	162.1	5.36	1.83	3	0	Medium	1	CAP-Gly domain-containing linker protein 1
CLIP4	Q8N3C7	1	1	1	1	705	76.3	8.7	0	1	0	Medium	1	CAP-Gly domain-containing linker protein 3
CLN5	O75503	4	1	2	1	358	41.5	7.4	0	1	0	Medium	1	Ceroid-lipofuscinosis neuronal protein 5
CLP1	Q92989	2	1	1	1	425	47.6	6.62	0	1	0	Medium	1	Polyribonucleotide 5'-hydroxyl-kinase Clp1
CLP1L	Q96KA5	2	1	1	1	538	62.2	8.56	0	1	0	Medium	1	Cleft lip and palate transmembrane protein 1-like protein
CLPT1	O96005	5	3	3	3	669	76	6.3	5.78	3	0	High	1	Cleft lip and palate transmembrane protein 1
CLSPN	Q9HAW4	1	1	2	1	1339	151	4.82	0	1	0	Medium	1	Claspin
CLU1O	Q5K130	14	1	1	1	101	11	9.51	0	1	0	Medium	1	Putative chronic lymphocytic leukemia up-regulated protein 1 opposite strand transcript protein
CLXN	Q9HAE3	4	1	1	1	211	24.5	5.06	1.73	1	0	Medium	1	EF-hand calcium-binding domain-containing protein 1
CMA1D	Q3SX64	4	1	1	1	289	30.8	9.95	0	1	0	Medium	1	Outer dense fiber protein 3-like protein 2
CMKMT	Q7Z624	6	2	2	2	323	36.1	6.83	0	2	0	Medium	1	Calmodulin-lysine N-methyltransferase
CMPK2	Q5EBM0	2	1	2	1	449	49.4	7.01	0	1	0	Medium	1	\UMP-CMP kinase 2, mitochondrial\""
CMTR2	Q8IYT2	2	1	1	1	770	88.1	7.01	0	1	0	Medium	1	Cap-specific mRNA (nucleoside-2'-O-)-methyltransferase 2
CMYA5	Q8N3K9	0	1	1	1	4069	448.9	4.78	0	1	0	Medium	1	Cardiomyopathy-associated protein 5
CNBD1	Q8NA66	3	1	1	1	436	50.2	9.07	0	1	0	Medium	1	Cyclic nucleotide-binding domain-containing protein 1
CND3	Q9BPX3	1	1	1	1	1015	114.3	5.59	2.54	1	0	High	1	Condensin complex subunit 3
CNDP2	Q96KP4	4	2	2	2	475	52.8	5.97	5.2	2	0	High	1	Cytosolic non-specific dipeptidase
CNN2	Q99439	7	2	2	2	309	33.7	7.33	1.95	2	0	High	1	Calponin-2
CNNM2	Q9H8M5	4	3	3	2	875	96.6	6.38	0	3	0	Medium	1	Metal transporter CNNM2
CNNM3	Q8NE01	1	1	2	1	707	76.1	6.09	0	1	0	Medium	1	Metal transporter CNNM3
CNOT6	Q9ULM6	2	1	1	1	557	63.3	7.27	0	1	0	Medium	1	CCR4-NOT transcription complex subunit 6
CNTN4	Q8IWV2	2	1	1	1	1026	113.4	7.47	2.54	1	0	Medium	1	Contactin-4
CNTN5	O94779	1	1	2	1	1100	120.6	6.34	0	1	0	Medium	1	Contactin-5
CNTN6	Q9UQ52	1	1	1	1	1028	113.9	6	0	1	0	Medium	1	Contactin-6
CNTRB	Q8N137	1	1	1	1	903	101.2	5.54	0	1	0	Medium	1	Centrobin
CO4A5	P29400	1	1	1	1	1685	160.9	7.62	0	1	0	Medium	1	Collagen alpha-5(IV) chain
CO8B	P07358	2	1	1	1	591	66.9	8.07	0	1	0	Medium	1	Complement component C8 beta chain
CO9A3	Q14050	1	1	1	1	684	63.6	7.68	0	1	0	Medium	1	Collagen alpha-3(IX) chain
COCA1	Q99715	1	2	2	2	3063	332.9	5.53	0	2	0	Medium	1	Collagen alpha-1(XII) chain
CODA1	Q5TAT6	3	2	2	2	717	69.9	9.17	0	2	0	Medium	1	Collagen alpha-1(XXV) chain
COG3	Q96JB2	2	1	1	1	828	94	5.57	3.12	1	0	High	1	Conserved oligomeric Golgi complex subunit 3
COG7	P83436	2	2	2	2	770	86.3	5.47	0	2	0	Medium	1	Conserved oligomeric Golgi complex subunit 7
COHA1	Q9UMD9	3	4	4	4	1497	150.3	8.79	0	4	0	Medium	1	Collagen alpha-1(XVII) chain
COIL	P38432	3	1	1	1	576	62.6	9.07	0	1	0	Medium	1	Coilin
COMA1	Q8NFW1	2	3	3	2	1626	161	7.23	0	3	0	Medium	1	Collagen alpha-1(XXII) chain
COMD7	Q86VX2	8	1	2	1	200	22.5	5.92	0	1	0	Medium	1	COMM domain-containing protein 7
COPG1	Q9Y678	9	6	6	4	874	97.7	5.47	9.56	6	0	High	1	Coatomer subunit gamma-1
COPG2	Q9UBF2	7	5	5	3	871	97.6	5.81	1.91	5	0	High	1	Coatomer subunit gamma-2
COQ8A	Q8NI60	2	1	1	1	647	71.9	6.99	0	1	0	Medium	1	\Atypical kinase COQ8A, mitochondrial\""
COR1B	Q9BR76	9	4	4	4	489	54.2	5.88	10.13	4	0	High	1	Coronin-1B
COR1C	Q9ULV4	6	3	3	3	474	53.2	7.08	2.9	3	0	High	1	Coronin-1C
CORA1	Q8IZC6	1	1	1	1	1860	186.8	9.82	0	1	0	Medium	1	Collagen alpha-1(XXVII) chain
CORIN	Q9Y5Q5	1	1	1	1	1042	116.4	5.02	0	1	0	Medium	1	Atrial natriuretic peptide-converting enzyme
CORO7	P57737	1	1	1	1	925	100.5	5.8	0	1	0	Medium	1	Coronin-7
COSA1	Q2UY09	1	1	1	1	1125	116.6	6.4	0	1	0	Medium	1	Collagen alpha-1(XXVIII) chain
COX1	P00395	2	1	1	1	513	57	6.7	0	1	0	Medium	1	Cytochrome c oxidase subunit 1
COX2	P00403	4	1	1	1	227	25.5	4.82	0	1	0	Medium	1	Cytochrome c oxidase subunit 2
COX41	P13073	26	4	5	4	169	19.6	9.51	10.49	4	0	High	1	\Cytochrome c oxidase subunit 4 isoform 1, mitochondrial\""
COX5B	P10606	9	1	1	1	129	13.7	8.81	0	1	0	Medium	1	\Cytochrome c oxidase subunit 5B, mitochondrial\""
COX6C	P09669	8	1	1	1	75	8.8	10.39	0	1	0	Medium	1	Cytochrome c oxidase subunit 6C
CP131	Q9UPN4	1	1	1	1	1083	122.1	8.69	0	1	0	Medium	1	Centrosomal protein of 131 kDa
CP24A	Q07973	2	1	1	1	514	58.8	8.75	0	1	0	Medium	1	\1,25-dihydroxyvitamin D(3) 24-hydroxylase, mitochondrial\""
CP250	Q9BV73	1	3	3	3	2442	281	5.02	3.54	3	0	Medium	1	Centrosome-associated protein CEP250
CP27B	O15528	1	1	1	1	508	56.5	9.16	0	1	0	Medium	1	\25-hydroxyvitamin D-1 alpha hydroxylase, mitochondrial\""
CP2AD	Q16696	4	2	2	2	494	56.7	9.28	0	2	0	Medium	1	Cytochrome P450 2A13
CP3A5	P20815	2	1	1	1	502	57.1	8.75	0	1	0	Medium	1	Cytochrome P450 3A7
CPHL2	A0A1W2PPK0	4	1	1	1	400	45.2	7.28	0	1	0	Medium	1	.
CPIN1	Q6FI81	3	1	1	1	312	33.6	5.62	0	1	0	Medium	1	Anamorsin
CPLX3	Q8WVH0	4	1	1	1	158	17.5	4.96	0	1	0	Medium	1	Complexin-3
CPNE1	Q99829	5	3	3	3	537	59	5.83	7.48	3	0	High	1	Copine-1
CPNE3	O75131	16	8	9	8	537	60.1	5.85	14.34	8	0	High	1	Copine-3
CPNE9	Q8IYJ1	3	1	1	1	553	61.8	5.34	0	1	0	Medium	1	Copine-9
CPNS1	P04632	6	2	2	2	268	28.3	5.2	0	2	0	Medium	1	Calpain small subunit 1
CPSF1	Q10570	1	2	2	2	1443	160.8	6.4	0	2	0	Medium	1	Cleavage and polyadenylation specificity factor subunit 1
CPSF5	O43809	8	2	2	2	227	26.2	8.82	2.59	2	0	High	1	Cleavage and polyadenylation specificity factor subunit 5
CPSF7	Q8N684	7	3	3	3	471	52	8	3.8	3	0	High	1	Cleavage and polyadenylation specificity factor subunit 7
CPSM	P31327	1	1	1	1	1500	164.8	6.74	0	1	0	Medium	1	\Carbamoyl-phosphate synthase [ammonia], mitochondrial\""
CPT2	P23786	11	8	8	8	658	73.7	8.18	7.77	8	0	High	1	Peroxisomal carnitine O-octanoyltransferase
CQ051	A8MQB3	5	1	1	1	221	24.3	9.72	0	1	0	Medium	1	Uncharacterized protein C17orf51
CQ080	Q9BSJ5	2	1	1	1	609	67.3	9.16	0	1	0	Medium	1	Uncharacterized protein C17orf80
CRBG1	Q9Y4K1	1	1	1	1	1723	188.6	5.86	0	1	0	Medium	1	Absent in melanoma 1 protein
CRHBP	P24387	12	2	2	2	322	36.1	6.52	0	2	0	Medium	1	Corticotropin-releasing factor-binding protein
CRIS3	P54108	10	2	2	2	245	27.6	7.8	2.03	2	0	Medium	1	Cysteine-rich secretory protein 3
CRLS1	Q9UJA2	8	1	1	1	301	32.6	9.67	0	1	0	Medium	1	Cardiolipin synthase (CMP-forming)
CRNL1	Q9BZJ0	2	1	1	1	848	100.4	8	1.74	1	0	Medium	1	Crooked neck-like protein 1
CRY2	Q49AN0	7	2	2	2	593	66.9	8.35	0	2	0	Medium	1	Cryptochrome-2
CSAD	Q9Y600	3	1	1	1	493	55	6.48	0	1	0	Medium	1	Cysteine sulfinic acid decarboxylase
CSDE1	O75534	11	8	8	8	798	88.8	6.25	11.11	8	0	High	1	Cold shock domain-containing protein E1
CSF1	P09603	3	1	1	1	554	60.1	5.29	0	1	0	Medium	1	Macrophage colony-stimulating factor 1
CSF2R	P15509	4	2	2	2	400	46.2	7.75	0	2	0	Medium	1	Granulocyte-macrophage colony-stimulating factor receptor subunit alpha
CSK	P41240	3	1	1	1	450	50.7	7.06	0	1	0	Medium	1	Tyrosine-protein kinase CSK
CSK21	P68400	5	2	2	1	391	45.1	7.74	1.83	2	0	Medium	1	Casein kinase II subunit alpha 3
CSKI1	Q8WXD9	1	1	1	1	1431	149.7	9.14	0	1	0	Medium	1	Caskin-1
CSKI2	Q8WXE0	2	2	3	1	1202	126.7	7.09	1.61	2	0	Medium	1	Caskin-2
CSMD3	Q7Z407	0	1	1	1	3707	405.7	6	0	1	0	Medium	1	CUB and sushi domain-containing protein 3
CSN1	Q13098	7	3	3	3	491	55.5	6.74	4.74	3	0	High	1	COP9 signalosome complex subunit 1
CSN2	P61201	2	1	1	1	443	51.6	5.53	0	1	0	Medium	1	COP9 signalosome complex subunit 2
CSN5	Q92905	3	1	1	1	334	37.6	6.54	0	1	0	Medium	1	COP9 signalosome complex subunit 5
CSN6	Q7L5N1	5	1	1	1	327	36.1	5.73	0	1	0	Medium	1	COP9 signalosome complex subunit 6
CSPG2	P13611	1	1	1	1	3396	372.6	4.51	0	1	0	Medium	1	Versican core protein
CSPP1	Q1MSJ5	2	3	3	3	1256	145.4	6.8	0	3	0	Medium	1	Centrosome and spindle pole-associated protein 1
CSRN2	Q9H175	2	1	1	1	543	59.6	4.77	0	1	0	Medium	1	Cysteine/serine-rich nuclear protein 2
CSTF1	Q05048	4	1	1	1	431	48.3	6.58	0	1	0	Medium	1	Cleavage stimulation factor subunit 1
CSTF2	P33240	6	3	3	3	577	60.9	6.83	4.26	3	0	High	1	Cleavage stimulation factor subunit 2
CSTP1	Q9H6J7	4	1	1	1	331	37.3	5.33	0	1	0	Medium	1	UPF0705 protein C11orf49 homolog
CTBL1	Q8WYA6	1	1	1	1	563	65.1	5.05	0	1	0	Medium	1	Beta-catenin-like protein 1
CTBP2	P56545	5	2	2	2	445	48.9	6.95	2.22	2	0	High	1	C-terminal-binding protein 2
CTDS1	Q9GZU7	6	1	1	1	261	29.2	6	0	1	0	Medium	1	Carboxy-terminal domain RNA polymerase II polypeptide A small phosphatase 1
CTGE8	P0CG41	1	1	1	1	777	88	5.31	0	1	0	Medium	1	cTAGE family member 8
CTIP	Q99708	2	1	1	1	897	101.9	6.3	0	1	0	Medium	1	DNA endonuclease RBBP8
CTL1	Q8WWI5	4	2	2	2	657	73.3	8.6	0	2	0	Medium	1	Choline transporter-like protein 1
CTNA2	P26232	13	11	13	3	953	105.2	5.71	16.38	11	0	High	1	Catenin alpha-2
CTND2	Q9UQB3	1	1	1	1	1225	132.6	7.74	0	1	0	Medium	1	Catenin delta-2
CTNL1	Q9UBT7	1	1	1	1	734	81.8	6.64	0	1	0	Medium	1	Alpha-catulin
CTR1	P30825	2	1	1	1	629	67.6	5.43	2.34	1	0	High	1	High affinity cationic amino acid transporter 1
CTRO	O14578	2	3	3	2	2027	231.3	6.57	0	3	0	Medium	1	Citron Rho-interacting kinase
CTTB2	Q8WZ74	1	2	2	1	1663	180.9	7.93	0	2	0	Medium	1	Cortactin-binding protein 2
CU129	Q96M42	9	1	1	1	142	15.2	8	0	1	0	Medium	1	Putative uncharacterized protein encoded by LINC00479
CUED2	Q9H467	15	3	3	3	287	32	4.81	0	3	0	Medium	1	CUE domain-containing protein 2
CUL1	Q13616	5	4	4	4	776	89.6	8	3.62	4	0	High	1	Cullin-1
CUL2	Q13617	2	2	2	1	745	86.9	6.92	1.92	2	0	High	1	Cullin-2
CUL4B	Q13620	1	1	1	1	913	103.9	7.37	0	1	0	Medium	1	Cullin-4B
CUL7	Q14999	1	3	3	3	1698	191	5.87	1.95	3	0	High	1	Cullin-7
CUTC	Q9NTM9	4	1	1	1	273	29.3	8.18	0	1	0	Medium	1	Copper homeostasis protein cutC homolog
CX6B2	Q6YFQ2	13	1	1	1	88	10.5	9.01	0	1	0	Medium	1	Cytochrome c oxidase subunit 6B2
CYB	P00156	4	2	2	2	380	42.7	8.05	2.29	2	0	High	1	Cytochrome b
CYC	P99999	25	3	3	3	105	11.7	9.57	3.89	3	0	High	1	Cytochrome c
CYL1B	A0A8V8TMC4	4	1	1	1	285	32.7	8.63	0	1	0	Medium	1	Putative cyclin-Y-like protein 3
CYLC1	P35663	1	1	1	1	651	74.2	9.67	0	1	0	Medium	1	Cylicin-1
CYLD	Q9NQC7	2	3	3	1	956	107.2	5.59	1.83	3	0	Medium	1	Ubiquitin carboxyl-terminal hydrolase CYLD
CYTB	P04080	21	2	2	2	98	11.1	7.56	0	2	0	Medium	1	Cystatin-B
D19L3	Q6ZPD9	2	2	2	1	716	83.1	8.72	0	2	0	Medium	1	Probable C-mannosyltransferase DPY19L3
DAAM2	Q86T65	1	1	1	1	1068	123.4	6.8	0	1	0	Medium	1	Disheveled-associated activator of morphogenesis 1
DAB2P	Q5VWQ8	1	1	1	1	1189	131.5	8.72	0	1	0	Medium	1	Disabled homolog 2-interacting protein
DACH1	Q9UI36	2	1	1	1	758	78.5	8.51	0	1	0	Medium	1	Dachshund homolog 1
DACT2	Q5SW24	2	2	2	2	774	82.6	8.87	0	2	0	Medium	1	Dapper homolog 2
DAPP1	Q9UN19	10	3	3	3	280	32.2	7.8	0	3	0	Medium	1	Dual adapter for phosphotyrosine and 3-phosphotyrosine and 3-phosphoinositide
DAZP1	Q96EP5	3	1	1	1	407	43.4	8.56	0	1	0	Medium	1	RNA-binding protein Musashi homolog 1
DB129	Q9H1M3	4	1	1	1	183	20.3	8.81	0	1	0	Medium	1	Beta-defensin 129
DBNL	Q9UJU6	12	4	5	4	430	48.2	5.05	4.66	4	0	High	1	Drebrin-like protein
DBR1	Q9UK59	3	2	2	2	544	61.5	5.47	4.66	2	0	High	1	Lariat debranching enzyme
DC1I2	Q13409	7	3	3	3	638	71.4	5.2	2.83	3	0	High	1	Cytoplasmic dynein 1 intermediate chain 2
DC1L1	Q9Y6G9	8	3	3	3	523	56.5	6.42	2.79	3	0	High	1	Cytoplasmic dynein 1 light intermediate chain 1
DCA10	Q5QP82	4	2	2	2	559	60.5	7.5	0	2	0	Medium	1	DDB1- and CUL4-associated factor 10
DCA11	Q8TEB1	3	2	2	1	546	61.6	6.4	0	2	0	Medium	1	DDB1- and CUL4-associated factor 11
DCAF1	Q9Y4B6	1	1	1	1	1507	168.9	5.06	0	1	0	Medium	1	Protein VPRBP
DCAKD	Q8WVC6	5	1	1	1	231	26.5	9.58	0	1	0	Medium	1	Dephospho-CoA kinase domain-containing protein
DCAM	P17707	4	2	4	2	334	38.3	6	0	2	0	Medium	1	S-adenosylmethionine decarboxylase proenzyme
DCLK3	Q9C098	4	2	2	2	648	73.8	8.84	0	2	0	Medium	1	Serine/threonine-protein kinase DCLK3
DCP1A	Q9NPI6	3	1	1	1	582	63.2	6.25	0	1	0	Medium	1	mRNA-decapping enzyme 1A
DCR1C	Q96SD1	3	1	1	1	692	78.4	6.02	0	1	0	Medium	1	Protein artemis
DD19A	Q9NUU7	14	5	5	5	478	53.9	6.58	8.85	5	0	High	1	ATP-dependent RNA helicase DDX19B
DDB2	Q92466	2	2	2	1	427	47.8	9.47	0	2	0	Medium	1	DNA damage-binding protein 2
DDX18	Q9NVP1	4	3	3	2	670	75.4	9.5	5.43	3	0	High	1	ATP-dependent RNA helicase DDX18
DDX20	Q9UHI6	1	1	1	1	824	92.2	6.95	2.04	1	0	High	1	Probable ATP-dependent RNA helicase DDX20
DDX41	Q9UJV9	2	1	1	1	622	69.8	6.84	0	1	0	Medium	1	Probable ATP-dependent RNA helicase DDX41
DDX6	P26196	9	4	4	4	483	54.4	8.66	9.33	4	0	High	1	Probable ATP-dependent RNA helicase DDX6
DEAF1	O75398	2	1	1	1	565	59.3	5.34	0	1	0	Medium	1	Deformed epidermal autoregulatory factor 1 homolog
DEFI6	Q9H4E7	4	1	2	1	631	73.9	6.05	0	1	0	Medium	1	Differentially expressed in FDCP 6 homolog
DEOC	Q9Y315	4	1	1	1	318	35.2	8.94	2.21	1	0	High	1	Deoxyribose-phosphate aldolase
DERL1	Q9BUN8	4	1	1	1	251	28.8	9.51	1.63	1	0	Medium	1	Derlin-1
DEST	P60981	7	1	1	1	165	18.5	7.85	2.74	1	0	High	1	Destrin
DGAT1	O75907	2	1	1	1	488	55.2	9.32	0	1	0	Medium	1	Diacylglycerol O-acyltransferase 1
DGCR6	Q14129	9	1	1	1	220	25	7.5	0	1	0	Medium	1	Protein DGCR6
DGKB	Q9Y6T7	2	2	2	2	804	90.5	7.85	0	2	0	Medium	1	Diacylglycerol kinase beta
DGKE	P52429	2	1	1	1	567	63.9	7.74	0	1	0	Medium	1	Diacylglycerol kinase epsilon
DGKI	O75912	0	1	1	1	1065	116.9	7.77	0	1	0	Medium	1	Diacylglycerol kinase iota
DGKQ	P52824	1	2	2	1	942	101.1	7.49	1.79	2	0	Medium	1	Diacylglycerol kinase theta
DGLA	Q9Y4D2	1	1	1	1	1042	114.9	6.35	0	1	0	Medium	1	Sn1-specific diacylglycerol lipase alpha
DHB1	P14061	5	1	1	1	328	34.9	5.69	2.03	1	0	Medium	1	Estradiol 17-beta-dehydrogenase 1
DHB11	Q8NBQ5	7	2	2	2	300	32.9	9.17	1.82	2	0	Medium	1	Estradiol 17-beta-dehydrogenase 11
DHB12	Q53GQ0	9	2	2	2	312	34.3	9.32	4.12	2	0	High	1	Very-long-chain 3-oxoacyl-CoA reductase
DHCR7	Q9UBM7	5	1	2	1	475	54.5	8.7	2.09	1	0	Medium	1	7-dehydrocholesterol reductase
DHRS6	Q9BUT1	4	1	1	1	245	26.7	7.65	0	1	0	Medium	1	3-hydroxybutyrate dehydrogenase type 2
DHX16	O60231	1	1	1	1	1041	119.2	6.8	0	1	0	Medium	1	Putative pre-mRNA-splicing factor ATP-dependent RNA helicase DHX16
DHX29	Q7Z478	2	3	3	3	1369	155.1	8.09	1.66	3	0	Medium	1	ATP-dependent RNA helicase DHX29
DHX8	Q14562	3	2	3	2	1220	139.2	8.32	2.08	2	0	Medium	1	ATP-dependent RNA helicase DHX8
DIAP1	O60610	4	6	6	5	1272	141.3	5.41	4.57	6	0	High	1	Protein diaphanous homolog 1
DIAP3	Q9NSV4	1	2	2	2	1193	136.8	7.03	0	2	0	Medium	1	Protein diaphanous homolog 3
DIDO1	Q9BTC0	1	2	2	2	2240	243.7	7.88	0	2	0	Medium	1	Death-inducer obliterator 1
DISP2	A7MBM2	1	1	1	1	1401	151.9	7.85	0	1	0	Medium	1	Protein dispatched homolog 2
DJB11	Q9UBS4	4	1	1	1	358	40.5	6.18	3.33	1	0	High	1	DnaJ homolog subfamily B member 11
DJC10	Q8IXB1	1	1	1	1	793	91	7.18	0	1	0	Medium	1	DnaJ homolog subfamily C member 10
DJC11	Q9NVH1	7	4	4	4	559	63.2	8.4	5.81	4	0	High	1	DnaJ homolog subfamily C member 11
DJC16	Q9Y2G8	1	1	1	1	782	90.5	7.12	0	1	0	Medium	1	DnaJ homolog subfamily C member 16
DJC21	Q5F1R6	3	1	2	1	531	62	5.47	0	1	0	Medium	1	DnaJ homolog subfamily C member 21
DJC28	Q9NX36	3	1	1	1	388	45.8	9.55	0	1	0	Medium	1	DnaJ homolog subfamily C member 28
DKC1	O60832	8	3	4	3	514	57.6	9.42	7.31	3	0	High	1	LINE-1 retrotransposable element ORF2 protein
DLG5	Q8TDM6	1	2	2	1	1919	213.7	7.42	1.68	2	0	Medium	1	Disks large homolog 5
DMBX1	Q8NFW5	4	1	1	1	382	41.2	8.6	0	1	0	Medium	1	Diencephalon/mesencephalon homeobox protein 1
DMD	P11532	0	1	1	1	3685	426.5	5.88	0	1	0	Medium	1	Dystrophin
DMP46	Q6ZS02	5	1	1	1	220	23.7	8.24	0	1	0	Medium	1	Putative GED domain-containing protein DNM1P46
DMXL1	Q9Y485	0	1	2	1	3027	337.6	6.34	0	1	0	Medium	1	DmX-like protein 1
DMXL2	Q8TDJ6	1	2	2	2	3036	339.4	6.38	0	2	0	Medium	1	DmX-like protein 2
DNAI1	Q9UI46	2	1	2	1	699	79.2	6.87	0	1	0	Medium	1	\Dynein intermediate chain 1, axonemal\""
DNAI7	Q6TDU7	1	1	1	1	716	83.1	5.29	0	1	0	Medium	1	Protein CASC1
DNJA1	P31689	13	4	5	3	397	44.8	7.08	8.7	4	0	High	1	DnaJ homolog subfamily A member 1
DNJA3	Q96EY1	3	1	1	1	480	52.5	9.26	0	1	0	Medium	1	\DnaJ homolog subfamily A member 3, mitochondrial\""
DNJA4	Q8WW22	5	2	2	2	397	44.8	7.59	0	2	0	Medium	1	DnaJ homolog subfamily A member 4
DNJB1	P25685	11	3	3	3	340	38	8.63	2.05	3	0	High	1	DnaJ homolog subfamily B member 1
DNJC2	Q99543	1	1	1	1	621	72	8.7	0	1	0	Medium	1	DnaJ homolog subfamily C member 2
DNJC5	Q9H3Z4	10	1	2	1	198	22.1	5.07	4.08	1	0	Medium	1	DnaJ homolog subfamily C member 5
DNJC7	Q99615	6	3	3	3	494	56.4	6.96	2.22	3	0	High	1	DnaJ homolog subfamily C member 7
DNJC9	Q8WXX5	4	1	1	1	260	29.9	5.73	0	1	0	Medium	1	DnaJ homolog subfamily C member 9
DNM3B	Q9UBC3	4	2	2	2	853	95.7	8.43	0	2	0	Medium	1	DNA (cytosine-5)-methyltransferase 3B
DNPEP	Q9ULA0	3	1	1	1	485	53.4	7.58	0	1	0	Medium	1	Aspartyl aminopeptidase
DOCK1	Q14185	1	2	3	1	1865	215.2	7.56	1.6	2	0	Medium	1	Dedicator of cytokinesis protein 1
DOCK4	Q8N1I0	1	2	2	2	1966	225.1	7.65	0	2	0	Medium	1	Dedicator of cytokinesis protein 4
DOCK7	Q96N67	1	2	2	2	2140	242.4	6.8	0	2	0	Medium	1	Dedicator of cytokinesis protein 6
DONS	Q9NYP3	2	1	1	1	566	62.7	8.66	0	1	0	Medium	1	Protein downstream neighbor of Son
DPOE2	P56282	2	1	1	1	527	59.5	6.35	0	1	0	Medium	1	DNA polymerase epsilon subunit 2
DPP8	Q6V1X1	1	1	1	1	898	103.3	5.8	0	1	0	Medium	1	Dipeptidyl peptidase 8
DPPA4	Q7L190	4	2	3	1	304	33.5	9.52	0	2	0	Medium	1	Developmental pluripotency-associated protein 4
DQX1	Q8TE96	1	1	1	1	717	79.4	5.02	2.25	1	0	High	1	ATP-dependent RNA helicase DQX1
DR9C7	Q8NEX9	2	1	1	1	313	35.2	9.16	0	1	0	Medium	1	Short-chain dehydrogenase/reductase family 9C member 7
DRC3	Q9H069	2	1	1	1	523	61	4.78	0	1	0	Medium	1	Dynein regulatory complex subunit 3
DRC4	O95995	3	2	2	2	478	56.3	7.94	0	2	0	Medium	1	Growth arrest-specific protein 8
DRG1	Q9Y295	4	1	1	1	367	40.5	8.9	3.41	1	0	High	1	Developmentally-regulated GTP-binding protein 1
DRG2	P55039	4	1	1	1	364	40.7	8.88	0	1	0	Medium	1	Developmentally-regulated GTP-binding protein 2
DSEL	Q8IZU8	1	2	2	2	1212	139.1	8.32	0	2	0	Medium	1	Dermatan-sulfate epimerase-like protein
DTX2	Q86UW9	1	1	1	1	622	67.2	8.47	0	1	0	Medium	1	Probable E3 ubiquitin-protein ligase DTX2
DUS11	O75319	2	1	1	1	377	43.7	9.29	0	1	0	Medium	1	RNA/RNP complex-1-interacting phosphatase
DUS29	Q68J44	3	1	1	1	220	25.3	6.04	0	1	0	Medium	1	Dual specificity phosphatase DUPD1
DUS3L	Q96G46	2	2	3	1	650	72.5	8.05	2.07	2	0	High	1	tRNA-dihydrouridine(47) synthase [NAD(P)(+)]-like
DUT	P33316	5	1	1	1	252	26.5	9.36	0	1	0	Medium	1	\Deoxyuridine 5'-triphosphate nucleotidohydrolase, mitochondrial\""
DVL3	Q92997	1	1	1	1	716	78	6.65	0	1	0	Medium	1	Segment polarity protein dishevelled homolog DVL-3
DX39B	Q13838	21	9	12	2	428	49	5.67	27.59	9	0	High	1	Spliceosome RNA helicase DDX39B
DYH10	Q8IVF4	1	2	2	2	4471	514.5	5.88	0	2	0	Medium	1	\Dynein heavy chain 10, axonemal\""
DYH12	Q6ZR08	1	2	2	2	3092	356.7	6.19	0	2	0	Medium	1	\Dynein heavy chain 12, axonemal\""
DYH14	Q0VDD8	0	1	1	1	3507	399.6	6.93	0	1	0	Medium	1	\Dynein heavy chain 6, axonemal\""
DYH17	Q9UFH2	0	2	2	2	4462	509	5.72	0	2	0	Medium	1	\Dynein heavy chain 17, axonemal\""
DYH3	Q8TD57	1	5	5	5	4116	470.5	6.43	0	5	0	Medium	1	\Dynein heavy chain 3, axonemal\""
DYH5	Q8TE73	1	3	3	2	4624	528.7	6.1	0	3	0	Medium	1	\Dynein heavy chain 5, axonemal\""
DYL2	Q96FJ2	12	1	1	1	89	10.3	7.37	1.82	1	0	Medium	1	\Dynein light chain 2, cytoplasmic\""
DYM	Q7RTS9	1	1	1	1	669	75.9	5.86	0	1	0	Medium	1	Dymeclin
DYRK4	Q9NR20	3	2	2	2	520	59.6	8.9	1.81	2	0	Medium	1	Dual specificity tyrosine-phosphorylation-regulated kinase 4
DYSF	O75923	1	3	3	1	2080	237.1	5.64	0	3	0	Medium	1	Dysferlin
DYST	Q03001	0	3	3	2	7570	860.1	5.25	0	3	0	Medium	1	Dystonin
DZIP3	Q86Y13	1	2	2	1	1208	138.5	6.87	0	2	0	Medium	1	E3 ubiquitin-protein ligase DZIP3
E2AK2	P19525	12	8	8	8	551	62.1	8.4	10.89	8	0	High	1	\Interferon-induced, double-stranded RNA-activated protein kinase\""
E2AK3	Q9NZJ5	1	1	1	1	1116	125.1	5.43	0	1	0	Medium	1	Eukaryotic translation initiation factor 2-alpha kinase 3
E2F6	O75461	5	1	1	1	281	31.8	5.5	0	1	0	Medium	1	Transcription factor E2F6
E41L1	Q9H4G0	4	3	4	2	881	98.4	5.62	1.9	3	0	High	1	Band 4.1-like protein 1
EAF6	Q9HAF1	4	1	1	1	191	21.6	9.32	0	1	0	Medium	1	Chromatin modification-related protein MEAF6
EBP2	Q99848	2	1	1	1	306	34.8	10.1	1.65	1	0	Medium	1	Probable rRNA-processing protein EBP2
ECEL1	O95672	1	1	1	1	775	87.7	7.03	0	1	0	Medium	1	Endothelin-converting enzyme-like 1
ECH1	Q13011	6	2	2	2	328	35.8	8	0	2	0	Medium	1	\Delta(3,5)-Delta(2,4)-dienoyl-CoA isomerase, mitochondrial\""
ECHB	P55084	10	5	5	5	474	51.3	9.41	4.39	5	0	High	1	\Trifunctional enzyme subunit beta, mitochondrial\""
ECHD1	Q9NTX5	9	2	2	2	307	33.7	8.21	0	2	0	Medium	1	Ethylmalonyl-CoA decarboxylase
ECHM	P30084	14	3	4	3	290	31.4	8.07	7.45	3	0	High	1	\Enoyl-CoA hydratase, mitochondrial\""
ECI1	P42126	5	1	1	1	302	32.8	8.54	0	1	0	Medium	1	\Enoyl-CoA delta isomerase 1, mitochondrial\""
EDEM1	Q92611	2	1	1	1	657	73.7	6.92	0	1	0	Medium	1	ER degradation-enhancing alpha-mannosidase-like protein 1
EFC4B	Q9BSW2	1	1	1	1	731	83.1	5.24	0	1	0	Medium	1	Ras-related protein Rab-44
EFHB	Q8N7U6	2	1	1	1	833	93.7	7.58	0	1	0	Medium	1	EF-hand domain-containing family member B
EFL1	Q7Z2Z2	1	1	1	1	1120	125.4	5.91	0	1	0	Medium	1	Elongation factor-like GTPase 1
EFR3A	Q14156	1	1	1	1	821	92.9	6.7	0	1	0	Medium	1	Protein EFR3 homolog A
EFTS	P43897	12	3	3	3	325	35.4	8.38	7.27	3	0	High	1	\Elongation factor Ts, mitochondrial\""
EGF	P01133	1	1	1	1	1207	133.9	5.85	0	1	0	Medium	1	Pro-epidermal growth factor
EGFLA	Q63HQ2	1	1	1	1	1017	111.2	7.4	0	1	0	Medium	1	Pikachurin
EH1L1	Q8N3D4	2	2	2	2	1523	161.8	4.83	0	2	0	Medium	1	EH domain-binding protein 1-like protein 1
EHBP1	Q8NDI1	2	2	2	2	1231	139.9	5.35	0	2	0	Medium	1	EH domain-binding protein 1
EHD4	Q9H223	25	13	13	11	541	61.1	6.76	27.52	13	0	High	1	EH domain-containing protein 4
EHMT1	Q9H9B1	1	2	2	2	1298	141.4	5.76	0	2	0	Medium	1	Histone-lysine N-methyltransferase EHMT1
EI2BE	Q13144	4	3	3	2	721	80.3	5.08	2.02	3	0	High	1	Translation initiation factor eIF-2B subunit epsilon
EIF1	P41567	28	2	2	2	113	12.7	7.44	5.41	2	0	High	1	Eukaryotic translation initiation factor 1
EIF2A	Q9BY44	19	9	10	9	585	64.9	8.87	19.6	9	0	High	1	Eukaryotic translation initiation factor 2A
EIF3J	O75822	4	1	1	1	258	29	4.83	2.98	1	0	High	1	Eukaryotic translation initiation factor 3 subunit J
EIF3K	Q9UBQ5	5	1	1	1	218	25	4.93	0	1	0	Medium	1	Eukaryotic translation initiation factor 3 subunit K
EKI1	Q9HBU6	4	1	1	1	452	50.9	6.54	0	1	0	Medium	1	Ethanolamine kinase 1
ELAV1	Q15717	12	4	4	4	326	36.1	9.17	8.26	4	0	High	1	ELAV-like protein 1
ELOA1	Q14241	2	1	1	1	798	89.9	9.57	0	1	0	Medium	1	Transcription elongation factor B polypeptide 3
ELOV4	Q9GZR5	6	1	1	1	314	36.8	9.47	0	1	0	Medium	1	Elongation of very long chain fatty acids protein 4
EMAL2	O95834	3	2	2	2	649	70.6	6.32	0	2	0	Medium	1	Echinoderm microtubule-associated protein-like 2
EMAL6	Q6ZMW3	1	1	1	1	1958	217.8	7.44	0	1	0	Medium	1	Echinoderm microtubule-associated protein-like 5
EME1	Q96AY2	2	1	1	1	570	63.2	7.05	0	1	0	Medium	1	Crossover junction endonuclease EME1
ENDD1	O94919	3	1	1	1	500	55	5.71	2.48	1	0	High	1	Endonuclease domain-containing 1 protein
ENKUR	Q8TC29	3	1	2	1	256	29.4	9.31	0	1	0	Medium	1	Enkurin
ENO4	A6NNW6	1	1	1	1	625	68.4	5.91	0	1	0	Medium	1	Enolase 4
ENPP2	Q13822	1	1	1	1	863	98.9	7.37	0	1	0	Medium	1	Ectonucleotide pyrophosphatase/phosphodiesterase family member 3
ENPP7	Q6UWV6	2	1	1	1	458	51.4	6.89	0	1	0	Medium	1	Ectonucleotide pyrophosphatase/phosphodiesterase family member 7
EOMES	O95936	2	1	1	1	686	72.7	7.36	2.15	1	0	Medium	1	Eomesodermin homolog
EP15R	Q9UBC2	2	2	2	2	864	94.2	5.11	0	2	0	Medium	1	Epidermal growth factor receptor substrate 15-like 1
EPB41	P11171	1	1	1	1	864	97	5.58	0	1	0	Medium	1	Protein 4.1
EPCAM	P16422	8	1	1	1	314	34.9	7.46	0	1	0	Medium	1	Epithelial cell adhesion molecule
EPG5	Q9HCE0	1	1	1	1	2579	292.3	6.43	0	1	0	Medium	1	Ectopic P granules protein 5 homolog
EPHA1	P21709	1	1	2	1	976	108.1	6.64	0	1	0	Medium	1	Ephrin type-A receptor 1
EPHA2	P29317	9	8	8	8	976	108.2	6.23	17.94	8	0	High	1	Ephrin type-A receptor 2
EPHA5	P54756	1	1	1	1	1037	114.7	6.93	0	1	0	Medium	1	Ephrin type-A receptor 5
EPN4	Q14677	8	4	5	4	625	68.2	6.42	10.5	4	0	High	1	Clathrin interactor 1
EPS15	P42566	2	2	2	2	896	98.6	4.64	0	2	0	Medium	1	Epidermal growth factor receptor substrate 15
EPT1	Q9C0D9	4	1	1	1	397	45.2	6.6	0	1	0	Medium	1	Ethanolaminephosphotransferase 1
ERAP1	Q9NZ08	3	2	2	2	941	107.2	6.46	1.63	2	0	Medium	1	Endoplasmic reticulum aminopeptidase 1
ERBB2	P04626	2	1	1	1	1255	137.8	5.91	0	1	0	Medium	1	Epidermal growth factor receptor
ERCC6	Q03468	1	1	1	1	1493	168.3	8.09	0	1	0	Medium	1	DNA excision repair protein ERCC-6
ERMIN	Q8TAM6	6	1	1	1	284	32.8	4.84	0	1	0	Medium	1	Ermin
ERO1A	Q96HE7	16	7	7	7	468	54.4	5.68	13.61	7	0	High	1	ERO1-like protein alpha
ERP29	P30040	11	3	3	3	261	29	7.31	4.11	3	0	High	1	Endoplasmic reticulum resident protein 29
ERP44	Q9BS26	10	4	4	3	406	46.9	5.26	0	4	0	Medium	1	Endoplasmic reticulum resident protein 44
ERR3	P62508	2	1	1	1	458	51.3	6.48	0	1	0	Medium	1	Estrogen-related receptor gamma
ES8L3	Q8TE67	4	2	2	2	593	66.8	7.99	2.17	2	0	High	1	Epidermal growth factor receptor kinase substrate 8-like protein 3
ESPL1	Q14674	1	2	2	2	2120	233	7.55	0	2	0	Medium	1	Separin
ESTD	P10768	12	3	3	3	282	31.4	7.02	0	3	0	Medium	1	S-formylglutathione hydrolase
ETFA	P13804	32	9	9	9	333	35.1	8.38	17.84	9	0	High	1	\Electron transfer flavoprotein subunit alpha, mitochondrial\""
ETFB	P38117	25	5	5	5	255	27.8	8.1	11.94	5	0	High	1	Electron transfer flavoprotein subunit beta
EVI2B	P34910	2	1	1	1	448	48.6	4.83	0	1	0	Medium	1	Protein EVI2B
EX3L1	Q86VI1	2	1	1	1	746	81.6	5.6	0	1	0	Medium	1	Exocyst complex component 3-like protein
EXO1	Q9UQ84	3	2	2	2	846	94	8.31	0	2	0	Medium	1	Exonuclease 1
EXOC3	O60645	4	2	2	2	745	85.5	6.29	0	2	0	Medium	1	Exocyst complex component 3
EXOC6	Q8TAG9	3	2	2	2	804	93.7	6.2	0	2	0	Medium	1	Exocyst complex component 6
EXOC7	Q9UPT5	1	1	1	1	735	83.3	6.79	0	1	0	Medium	1	Exocyst complex component 7
EXOS7	Q15024	11	2	2	2	291	31.8	5.19	1.72	2	0	Medium	1	Exosome complex component RRP42
EXOS9	Q06265	3	1	1	1	439	48.9	5.29	2.63	1	0	High	1	Exosome complex component RRP45
EXOSX	Q01780	1	1	1	1	885	100.8	8.46	2.16	1	0	High	1	Exosome component 10
EXPH5	Q8NEV8	1	1	3	1	1989	222.4	7.81	0	1	0	Medium	1	Exophilin-5
F10C1	Q70Z53	3	1	1	1	315	37.5	8.1	0	1	0	Medium	1	Protein FRA10AC1
F120S	Q5T036	4	1	1	1	256	27.9	11.93	0	1	0	Medium	1	Uncharacterized protein FAM120AOS
F13A	P00488	2	1	1	1	732	83.2	6	0	1	0	Medium	1	Coagulation factor XIII A chain
F151A	Q8WW52	2	1	2	1	585	64	6.67	1.68	1	0	Medium	1	Protein FAM151A
F162B	Q5T6X4	12	1	1	1	162	17.7	10.77	0	1	0	Medium	1	Protein FAM162B
F172A	Q8WUF8	2	1	1	1	416	47.9	6.09	0	1	0	Medium	1	Protein FAM172A
F182A	Q5T1J6	14	1	1	1	154	17.2	6.99	0	1	0	Medium	1	Protein FAM182A
F184B	Q9ULE4	1	1	1	1	1060	121	6.18	0	1	0	Medium	1	Protein FAM184B
F186A	A6NE01	1	2	2	2	2351	262.6	8.6	0	2	0	Medium	1	Protein FAM186A
F200B	P0CF97	2	2	2	2	657	76	8.07	0	2	0	Medium	1	Protein FAM200B
F219B	Q5XKK7	8	1	1	1	198	21.1	8.25	0	1	0	Medium	1	Protein FAM219B
F220A	Q7Z4H9	4	1	1	1	259	28	8.56	0	1	0	Medium	1	Protein FAM220A
F246A	A0A494C0Y3	9	2	2	2	232	24.3	11.06	0	2	0	Medium	1	.
F27E3	Q08E93	11	1	1	1	113	13.5	11.88	0	1	0	Medium	1	Protein FAM27E3
FA20C	Q8IXL6	1	1	1	1	584	66.2	7.74	0	1	0	Medium	1	Extracellular serine/threonine protein kinase FAM20C
FA50A	Q14320	4	2	2	2	339	40.2	6.83	0	2	0	Medium	1	Protein FAM50A
FA76B	Q5HYJ3	2	1	1	1	339	38.7	9.25	0	1	0	Medium	1	Protein FAM76B
FA8	P00451	1	3	3	3	2351	266.8	7.36	0	3	0	Medium	1	Coagulation factor VIII
FA81A	Q8TBF8	7	2	2	2	368	42.4	8.92	0	2	0	Medium	1	Protein FAM81A
FA83G	A6ND36	3	2	2	2	823	90.8	6.39	1.68	2	0	Medium	1	Protein FAM83G
FA83H	Q6ZRV2	1	1	1	1	1179	127	6.98	0	1	0	Medium	1	Protein FAM83H
FA98B	Q52LJ0	6	2	2	2	433	45.5	8.69	5.1	2	0	High	1	Protein FAM98B
FAAH1	O00519	2	1	1	1	579	63	7.66	1.73	1	0	Medium	1	Fatty-acid amide hydrolase 1
FACD2	Q9BXW9	1	2	2	2	1451	164	5.88	1.91	2	0	High	1	Fanconi anemia group D2 protein
FAF1	Q9UNN5	2	2	2	2	650	73.9	4.88	3.52	2	0	Medium	1	FAS-associated factor 1
FAF2	Q96CS3	3	2	2	2	445	52.6	5.62	1.76	2	0	Medium	1	FAS-associated factor 2
FAKD4	Q969Z0	13	8	8	7	631	70.7	7.42	13.44	8	0	High	1	Protein TBRG4
FAKD5	Q7L8L6	3	2	2	1	764	86.5	8.13	0	2	0	Medium	1	\FAST kinase domain-containing protein 5, mitochondrial\""
FAM27	Q5VT28	16	1	1	1	67	7.4	8	0	1	0	Medium	1	Protein FAM27A/B/C
FANCE	Q9HB96	4	1	1	1	536	58.7	5.24	0	1	0	Medium	1	Fanconi anemia group E protein
FANCI	Q9NVI1	6	7	7	7	1328	149.2	6.74	7.82	7	0	High	1	Fanconi anemia group I protein
FAP20	Q6NZ36	18	1	1	1	180	19.9	7.36	0	1	0	Medium	1	Fanconi anemia core complex-associated protein 20
FARP2	O94887	1	2	2	2	1054	119.8	8.79	0	2	0	Medium	1	\FERM, RhoGEF and pleckstrin domain-containing protein 1\""
FAT2	Q9NYQ8	1	2	2	2	4349	479	5.16	0	2	0	Medium	1	Protocadherin Fat 2
FAT4	Q6V0I7	0	2	2	1	4981	542.4	4.94	0	2	0	Medium	1	Protocadherin Fat 4
FBP1L	Q5T0N5	1	1	1	1	605	70	6.64	0	1	0	Medium	1	Formin-binding protein 1-like
FBW1B	Q9UKB1	2	1	1	1	542	62.1	7.12	0	1	0	Medium	1	F-box/WD repeat-containing protein 11
FBX16	Q8IX29	6	2	2	2	292	34.6	10.02	0	2	0	Medium	1	Zinc finger protein 395
FBX22	Q8NEZ5	2	1	1	1	403	44.5	7.03	0	1	0	Medium	1	F-box only protein 22
FBX34	Q9NWN3	2	1	1	1	711	78.7	8	0	1	0	Medium	1	F-box only protein 34
FBX38	Q6PIJ6	1	1	1	1	1188	133.9	6.33	0	1	0	Medium	1	F-box only protein 38
FBX43	Q4G163	3	2	2	2	708	78.4	8.07	0	2	0	Medium	1	F-box only protein 43
FBXW5	Q969U6	3	2	2	1	566	63.9	6.33	0	2	0	Medium	1	F-box/WD repeat-containing protein 5
FCHO2	Q0JRZ9	2	1	1	1	810	88.9	6.86	1.82	1	0	Medium	1	F-BAR domain only protein 2
FDFT	P37268	4	2	2	2	417	48.1	6.54	0	2	0	Medium	1	Squalene synthase
FERM1	Q9BQL6	4	3	3	3	677	77.4	6.28	3.88	3	0	High	1	Fermitin family homolog 1
FGD1	P98174	4	2	2	2	961	106.5	6.58	2.44	2	0	Medium	1	\FYVE, RhoGEF and PH domain-containing protein 1\""
FGF20	Q9NP95	4	1	1	1	211	23.5	8.76	0	1	0	Medium	1	Fibroblast growth factor 20
FHL2	Q14192	10	1	1	1	279	32.2	7.55	0	1	0	Medium	1	Four and a half LIM domains protein 2
FIBP	O43427	2	1	1	1	364	41.9	6.48	0	1	0	Medium	1	Acidic fibroblast growth factor intracellular-binding protein
FIG4	Q92562	1	1	1	1	907	103.6	6.92	0	1	0	Medium	1	Polyphosphoinositide phosphatase
FKBP3	Q00688	4	1	1	1	224	25.2	9.28	0	1	0	Medium	1	Peptidyl-prolyl cis-trans isomerase FKBP3
FKBP8	Q14318	4	1	1	1	412	44.5	4.84	0	1	0	Medium	1	Peptidyl-prolyl cis-trans isomerase FKBP8
FKBP9	O95302	2	1	1	1	570	63	5.08	0	1	0	Medium	1	Peptidyl-prolyl cis-trans isomerase FKBP9
FLIP1	Q7Z7B0	2	2	2	2	1213	138	8.32	0	2	0	Medium	1	Filamin-A-interacting protein 1
FLRT3	Q9NZU0	1	1	1	1	649	73	7.64	1.76	1	0	Medium	1	Leucine-rich repeat transmembrane protein FLRT3
FLT3	P36888	2	1	2	1	993	112.8	5.68	0	1	0	Medium	1	Receptor-type tyrosine-protein kinase FLT3
FLTOP	Q5VTH2	3	1	3	1	177	19.3	10.08	0	1	0	Medium	1	Protein Flattop
FMNL2	Q96PY5	1	1	1	1	1086	123.2	7.4	0	1	0	Medium	1	Formin-like protein 2
FN3K	Q9H479	3	1	1	1	309	35.1	7.55	0	1	0	Medium	1	Ketosamine-3-kinase
FNBP1	Q96RU3	1	1	1	1	617	71.3	5.72	0	1	0	Medium	1	Formin-binding protein 1
FNDC1	Q4ZHG4	2	2	2	2	1894	205.4	9.32	0	2	0	Medium	1	Fibronectin type III domain-containing protein 1
FNIP1	Q8TF40	1	1	1	1	1166	130.5	5.52	0	1	0	Medium	1	Folliculin-interacting protein 1
FOLH1	Q04609	1	1	1	1	750	84.3	6.98	0	1	0	Medium	1	Glutamate carboxypeptidase 2
FOXK1	P85037	3	3	3	3	733	75.4	9.32	3.7	3	0	High	1	Forkhead box protein K1
FOXN3	O00409	4	1	1	1	490	53.8	6.65	0	1	0	Medium	1	Forkhead box protein N3
FOXO1	Q12778	3	1	2	1	655	69.6	6.77	0	1	0	Medium	1	Forkhead box protein O1
FPR2	P25090	2	1	1	1	351	38.9	7.9	0	1	0	Medium	1	N-formyl peptide receptor 2
FR1L5	A0AVI2	1	2	3	2	2057	237.8	8.05	0	2	0	Medium	1	Fer-1-like protein 5
FRAT2	O75474	3	1	1	1	233	24	5.52	0	1	0	Medium	1	GSK-3-binding protein FRAT2
FREM1	Q5H8C1	1	1	1	1	2179	244	5.9	0	1	0	Medium	1	FRAS1-related extracellular matrix protein 1
FREM3	P0C091	0	1	2	1	2139	238	5.33	0	1	0	Medium	1	FRAS1-related extracellular matrix protein 3
FRITZ	O95876	2	1	1	1	746	85	6.39	0	1	0	Medium	1	WD repeat-containing and planar cell polarity effector protein fritz homolog
FRK	P42685	2	1	1	1	505	58.2	6.67	0	1	0	Medium	1	Tyrosine-protein kinase FRK
FRM4A	Q9P2Q2	2	2	2	2	1039	115.4	8.87	0	2	0	Medium	1	FERM domain-containing protein 4A
FRMD8	Q9BZ67	4	2	2	2	464	51.2	6.23	0	2	0	Medium	1	FERM domain-containing protein 8
FRPD1	Q5SYB0	1	1	2	1	1578	173.3	5.25	0	1	0	Medium	1	FERM and PDZ domain-containing protein 1
FRPD4	Q14CM0	1	2	2	1	1322	144.3	5.25	1.85	2	0	Medium	1	FERM and PDZ domain-containing protein 4
FRYL	O94915	1	2	2	2	3013	339.4	5.58	0	2	0	Medium	1	Protein furry homolog-like
FSCN1	Q16658	17	7	8	7	493	54.5	7.24	16.58	7	0	High	1	Fascin
FSD1	Q9BTV5	3	1	1	1	496	55.8	6.99	0	1	0	Medium	1	Fibronectin type III and SPRY domain-containing protein 1
FSIP1	Q8NA03	1	1	1	1	581	66.1	5.16	1.61	1	0	Medium	1	Fibrous sheath-interacting protein 1
FUMH	P07954	8	3	4	3	510	54.6	8.76	5.08	3	0	High	1	\Fumarate hydratase, mitochondrial\""
FUS	P35637	15	7	12	4	526	53.4	9.36	34.03	7	0	High	1	RNA-binding protein FUS
FUT10	Q6P4F1	1	1	1	1	479	56.1	8.37	1.65	1	0	Medium	1	\Alpha-(1,3)-fucosyltransferase 10\""
FX4L6	Q3SYB3	5	1	1	1	417	45.8	9.66	0	1	0	Medium	1	Forkhead box protein D4-like 6
FXL16	Q8N461	2	1	1	1	479	51.6	6.52	0	1	0	Medium	1	F-box/LRR-repeat protein 16
FXL19	Q6PCT2	1	1	1	1	694	75.7	9.17	0	1	0	Medium	1	F-box/LRR-repeat protein 19
FXR2	P51116	4	3	3	2	673	74.2	6.23	2.35	3	0	Medium	1	Fragile X mental retardation syndrome-related protein 2
FXRD1	Q96CU9	1	1	1	1	486	53.8	7.78	0	1	0	Medium	1	FAD-dependent oxidoreductase domain-containing protein 1
G3BP1	Q13283	36	12	15	12	466	52.1	5.52	36.05	12	0	High	1	Ras GTPase-activating protein-binding protein 1
G3BP2	Q9UN86	4	2	2	2	482	54.1	5.55	0	2	0	Medium	1	Ras GTPase-activating protein-binding protein 2
G3ST4	Q96RP7	1	1	1	1	486	54.1	10.18	0	1	0	Medium	1	Galactose-3-O-sulfotransferase 4
G6PD	P11413	7	3	3	3	515	59.2	6.84	5.67	3	0	High	1	Glucose-6-phosphate 1-dehydrogenase
GAB4	Q2WGN9	2	1	1	1	574	62.3	7.59	0	1	0	Medium	1	GRB2-associated-binding protein 4
GAK	O14976	1	2	2	2	1311	143.1	5.73	0	2	0	Medium	1	Cyclin-G-associated kinase
GALK1	P51570	2	1	1	1	392	42.2	6.46	0	1	0	Medium	1	Galactokinase
GALT3	Q14435	4	3	3	2	633	72.6	7.99	6.17	3	0	High	1	Polypeptide N-acetylgalactosaminyltransferase 3
GAMT	Q14353	7	1	1	1	236	26.3	6.14	0	1	0	Medium	1	Guanidinoacetate N-methyltransferase
GAN	Q9H2C0	3	1	4	1	597	67.6	5.85	0	1	0	Medium	1	Gigaxonin
GANAB	Q14697	22	20	24	20	944	106.8	6.14	50.07	20	0	High	1	Neutral alpha-glucosidase AB
GAPD1	Q14C86	1	2	2	2	1478	164.9	5.22	1.63	2	0	Medium	1	GTPase-activating protein and VPS9 domain-containing protein 1
GAR1A	Q6NXP2	5	1	1	1	309	34.5	6.61	0	1	0	Medium	1	Protein FAM71F2
GAR3	Q8TC56	4	1	1	1	605	64.7	9.48	0	1	0	Medium	1	Protein FAM71B
GATA4	P43694	2	1	1	1	442	44.5	9.26	1.9	1	0	High	1	Transcription factor GATA-4
GATC	O43716	8	2	2	2	136	15.1	5.05	0	2	0	Medium	1	\Glutamyl-tRNA(Gln) amidotransferase subunit C, mitochondrial\""
GBA1	P04062	2	1	1	1	536	59.7	7.61	1.62	1	0	Medium	1	Glucosylceramidase
GBA2	Q9HCG7	1	1	1	1	927	104.6	5.92	0	1	0	Medium	1	Non-lysosomal glucosylceramidase
GBB3	P16520	10	5	6	1	340	37.2	5.67	5.11	5	0	Medium	1	Guanine nucleotide-binding protein G(I)/G(S)/G(T) subunit beta-3
GBF1	Q92538	1	3	4	2	1859	206.3	5.73	3.94	3	0	Medium	1	Golgi-specific brefeldin A-resistance guanine nucleotide exchange factor 1
GBG4	P50150	9	1	1	1	75	8.4	7.08	0	1	0	Medium	1	Guanine nucleotide-binding protein G(I)/G(S)/G(O) subunit gamma-4
GBP7	Q8N8V2	2	2	2	2	638	72.5	5.99	0	2	0	Medium	1	Guanylate-binding protein 7
GBRG2	P18507	1	1	1	1	475	55.2	8.66	0	1	0	Medium	1	Gamma-aminobutyric acid receptor subunit gamma-2
GCC1	Q96CN9	2	1	1	1	775	87.8	5.45	0	1	0	Medium	1	GRIP and coiled-coil domain-containing protein 1
GCNT3	O95395	12	5	5	5	438	50.8	8.25	7.28	5	0	High	1	\Beta-1,3-galactosyl-O-glycosyl-glycoprotein beta-1,6-N-acetylglucosaminyltransferase 3\""
GCP3	Q96CW5	1	1	1	1	907	103.5	8.12	0	1	0	Medium	1	Gamma-tubulin complex component 3
GCP6	Q96RT7	1	2	2	2	1819	200.4	6.32	1.68	2	0	Medium	1	Gamma-tubulin complex component 6
GCSAM	Q8N6F7	4	1	1	1	178	21	6.52	0	1	0	Medium	1	Germinal center-associated signaling and motility protein
GCYA2	P33402	2	1	1	1	732	81.7	7.66	0	1	0	Medium	1	Guanylate cyclase soluble subunit alpha-2
GCYB1	Q02153	2	1	1	1	619	70.5	5.35	1.88	1	0	Medium	1	Guanylate cyclase soluble subunit beta-1
GD1L1	Q96MZ0	4	1	1	1	367	41.9	6.6	0	1	0	Medium	1	Ganglioside-induced differentiation-associated protein 1-like 1
GDIA	P31150	13	5	5	2	447	50.6	5.14	8.27	5	0	High	1	Rab GDP dissociation inhibitor beta
GDIR1	P52565	26	3	3	3	204	23.2	5.11	2.55	3	0	High	1	Rho GDP-dissociation inhibitor 1
GDN	P07093	3	1	1	1	398	44	9.29	0	1	0	Medium	1	Plasminogen activator inhibitor 1
GDPD1	Q8N9F7	3	1	1	1	314	36.1	8.47	0	1	0	Medium	1	Glycerophosphodiester phosphodiesterase domain-containing protein 1
GDPD5	Q8WTR4	2	1	1	1	605	68.5	7.72	0	1	0	Medium	1	Glycerophosphodiester phosphodiesterase domain-containing protein 5
GET3	O43681	3	1	1	1	348	38.8	4.91	0	1	0	Medium	1	ATPase ASNA1
GG6L2	Q8N9W4	2	2	2	2	909	100.5	4.67	0	2	0	Medium	1	Golgin subfamily A member 6-like protein 2
GG6L7	A0A1B0GV03	2	1	1	1	622	75.5	5.34	0	1	0	Medium	1	Golgin subfamily A member 6-like protein 2
GGA1	Q9UJY5	3	2	2	2	639	70.3	5.29	0	2	0	Medium	1	ADP-ribosylation factor-binding protein GGA1
GGN	Q86UU5	1	1	1	1	652	66.7	10.29	0	1	0	Medium	1	Gametogenetin
GGYF2	Q6Y7W6	2	1	4	1	1299	150	5.54	9.25	1	0	Medium	1	PERQ amino acid-rich with GYF domain-containing protein 2
GHC1	Q9H936	2	1	1	1	323	34.4	9.29	0	1	0	Medium	1	Mitochondrial glutamate carrier 1
GLB1L	Q6UWU2	2	1	1	1	654	74.1	8.92	0	1	0	Medium	1	Beta-galactosidase-1-like protein
GLCE	O94923	2	1	1	1	617	70.1	8.97	2.06	1	0	Medium	1	D-glucuronyl C5-epimerase
GLCNE	Q9Y223	3	2	2	2	722	79.2	6.8	1.62	2	0	Medium	1	Bifunctional UDP-N-acetylglucosamine 2-epimerase/N-acetylmannosamine kinase
GLE1	Q53GS7	1	1	1	1	698	79.8	7.43	1.67	1	0	Medium	1	Nucleoporin GLE1
GLI3	P10071	1	2	2	2	1580	169.8	7.4	0	2	0	Medium	1	Transcriptional activator GLI3
GLO2	Q16775	6	1	2	1	308	33.8	8.12	0	1	0	Medium	1	\Hydroxyacylglutathione hydrolase, mitochondrial\""
GLOD5	A6NK44	8	1	1	1	160	18.3	7.84	0	1	0	Medium	1	Glyoxalase domain-containing protein 5
GLUCM	Q7Z3D6	2	1	1	1	616	66.4	6.79	2.46	1	0	High	1	\UPF0317 protein C14orf159, mitochondrial\""
GLYC	P34896	4	2	2	1	483	53	7.71	4.05	2	0	Medium	1	\Serine hydroxymethyltransferase, cytosolic\""
GLYL2	Q8WU03	3	1	1	1	294	34.3	6.68	0	1	0	Medium	1	Glycine N-acyltransferase-like protein 2
GLYR1	Q49A26	2	1	1	1	553	60.5	9.17	1.64	1	0	Medium	1	Putative oxidoreductase GLYR1
GNA1	Q96EK6	8	1	1	1	184	20.7	7.99	0	1	0	Medium	1	Glucosamine 6-phosphate N-acetyltransferase
GNA13	Q14344	6	3	3	1	377	44	8	6.25	3	0	High	1	Guanine nucleotide-binding protein subunit alpha-13
GNAI2	P04899	10	3	3	2	355	40.4	5.54	6.86	3	0	High	1	Guanine nucleotide-binding protein G(i) subunit alpha-2
GNAS1	Q5JWF2	5	6	6	4	1037	111	5.03	7.85	6	0	High	1	Guanine nucleotide-binding protein G(olf) subunit alpha
GNL3	Q9BVP2	3	2	2	2	549	62	9.16	0	2	0	Medium	1	Guanine nucleotide-binding protein-like 3
GNPAT	O15228	4	2	2	2	680	77.1	6.57	0	2	0	Medium	1	Dihydroxyacetone phosphate acyltransferase
GNS	P15586	4	3	3	3	552	62	8.31	3.6	3	0	Medium	1	N-acetylglucosamine-6-sulfatase
GOG8C	A6NN73	3	2	2	2	597	67.1	8.54	0	2	0	Medium	1	Golgin subfamily A member 8M
GOGA4	Q13439	2	4	5	3	2230	261	5.39	1.61	4	0	Medium	1	Golgin subfamily A member 4
GOGB1	Q14789	1	3	3	2	3259	375.8	5	1.82	3	0	Medium	1	Golgin subfamily B member 1
GOR	Q8IX06	3	2	2	2	675	73.8	9.14	0	2	0	Medium	1	Exonuclease GOR
GOT1B	Q9Y3E0	10	1	1	1	138	15.4	10.36	3.38	1	0	High	1	Vesicle transport protein GOT1B
GP180	Q86V85	2	1	2	1	440	49.4	7.39	0	1	0	Medium	1	Integral membrane protein GPR180
GPAM1	Q8IXQ4	3	1	1	1	340	38.1	5.41	0	1	0	Medium	1	GPALPP motifs-containing protein 1
GPC1	P35052	1	1	1	1	558	61.6	7.3	0	1	0	Medium	1	Glypican-1
GPR82	Q96P67	5	2	2	2	336	38.4	9.03	0	2	0	Medium	1	Probable G-protein coupled receptor 82
GPSM1	Q86YR5	1	1	1	1	675	74.5	6.54	0	1	0	Medium	1	G-protein-signaling modulator 1
GPTC1	Q9BRR8	1	1	2	1	931	103.3	7.05	0	1	0	Medium	1	G patch domain-containing protein 1
GRD2I	A4D2P6	3	2	5	2	1211	132.2	7.4	0	2	0	Medium	1	Delphilin
GRHL2	Q6ISB3	3	1	1	1	625	71.1	6.44	0	1	0	Medium	1	Grainyhead-like protein 2 homolog
GRHPR	Q9UBQ7	3	1	1	1	328	35.6	7.39	2.17	1	0	High	1	Glyoxylate reductase/hydroxypyruvate reductase
GRIN3	Q6ZVF9	1	1	2	1	776	82.4	7.56	2.07	1	0	High	1	G protein-regulated inducer of neurite outgrowth 3
GRK5	P34947	1	1	1	1	590	67.7	8.1	0	1	0	Medium	1	G protein-coupled receptor kinase 5
GRM5	P41594	1	2	3	2	1212	132.4	7.78	0	2	0	Medium	1	Metabotropic glutamate receptor 5
GRP2	Q7LDG7	3	2	2	2	609	69.2	7.8	0	2	0	Medium	1	RAS guanyl-releasing protein 2
GRWD1	Q9BQ67	5	2	4	1	446	49.4	4.92	2.24	2	0	High	1	Glutamate-rich WD repeat-containing protein 1
GSAML	Q5JQS6	5	1	1	1	135	15.7	6.68	0	1	0	Medium	1	Germinal center-associated signaling and motility-like protein
GSAS1	Q9NRJ2	7	1	1	1	163	17.6	10.93	0	1	0	Medium	1	Putative uncharacterized protein GSN-AS1
GSH1	P48506	1	1	1	1	637	72.7	6.09	1.74	1	0	Medium	1	Glutamate--cysteine ligase catalytic subunit
GSTK1	Q9Y2Q3	13	2	2	2	226	25.5	8.41	4.93	2	0	High	1	Glutathione S-transferase kappa 1
GSTM5	P46439	6	1	1	1	218	25.7	7.39	0	1	0	Medium	1	Glutathione S-transferase Mu 1
GTPB1	O00178	4	2	2	2	669	72.4	8.34	2.86	2	0	High	1	GTP-binding protein 1
GTR1	P11166	6	3	3	3	492	54	8.72	1.96	3	0	High	1	\Solute carrier family 2, facilitated glucose transporter member 1\""
GUAD	Q9Y2T3	7	3	3	3	454	51	5.68	5.41	3	0	High	1	Guanine deaminase
GUF1	Q8N442	1	2	2	1	669	74.3	8.59	1.79	2	0	Medium	1	\Translation factor GUF1, mitochondrial\""
GXLT1	Q4G148	3	1	1	1	440	50.5	8.65	0	1	0	Medium	1	Glucoside xylosyltransferase 1
GYS1	P13807	2	2	2	2	737	83.7	6.18	3.83	2	0	High	1	\Glycogen [starch] synthase, muscle\""
GZF1	Q9H116	2	2	2	2	711	80.4	7.87	0	2	0	Medium	1	GDNF-inducible zinc finger protein 1
H1X	Q92522	21	3	3	3	213	22.5	10.76	5.43	3	0	High	1	Histone H1x
H2A2B	Q8IUE6	18	3	4	1	130	14	10.89	9.22	3	0	Medium	1	Histone H2A type 2-B
H2AW	Q9P0M6	3	1	1	1	372	40	9.69	0	1	0	Medium	1	Core histone macro-H2A.2
H2AX	P16104	22	4	6	1	143	15.1	10.74	13.84	4	0	High	1	Histone H2AX
H2B2C	Q6DN03	13	4	10	2	193	21.5	10.7	12.27	4	0	High	1	Putative histone H2B type 2-C
H2BWT	Q7Z2G1	6	1	1	1	175	19.6	10.52	0	1	0	Medium	1	Histone H2B type W-T
H6ST1	O60243	5	1	1	1	411	48.2	8.79	0	1	0	Medium	1	Heparan-sulfate 6-O-sulfotransferase 1
H90B4	Q58FF6	13	7	10	2	505	58.2	4.73	17.34	7	0	High	1	Heat shock protein HSP 90-beta
HACL2	A1L0T0	5	2	2	2	632	67.8	8.15	0	2	0	Medium	1	Acetolactate synthase-like protein
HAP28	Q13442	16	2	2	2	181	20.6	8.87	5.13	2	0	High	1	28 kDa heat- and acid-stable phosphoprotein
HARS1	P12081	11	5	5	2	509	57.4	5.88	13.17	5	0	High	1	\Probable histidine--tRNA ligase, mitochondrial\""
HAT1	O14929	3	1	1	1	419	49.5	5.69	0	1	0	Medium	1	Histone acetyltransferase type B catalytic subunit
HAUS1	Q96CS2	8	2	2	2	278	31.8	5.53	0	2	0	Medium	1	HAUS augmin-like complex subunit 1
HAUS2	Q9NVX0	5	1	1	1	235	26.9	7.88	0	1	0	Medium	1	HAUS augmin-like complex subunit 2
HBS1L	Q9Y450	3	2	2	2	684	75.4	6.61	2.47	2	0	High	1	HBS1-like protein
HCFC1	P51610	3	5	5	5	2035	208.6	7.46	2.88	5	0	High	1	Host cell factor 1
HDA11	Q96DB2	3	1	1	1	347	39.2	7.65	0	1	0	Medium	1	Histone deacetylase 11
HDAC1	Q13547	11	6	7	4	482	55.1	5.48	11.77	6	0	High	1	Histone deacetylase 2
HDAC2	Q92769	9	4	5	2	488	55.3	5.91	8.79	4	0	High	1	Histone deacetylase 2
HDAC7	Q8WUI4	1	2	2	1	952	102.9	7.58	0	2	0	Medium	1	Histone deacetylase 5
HDGF	P51858	4	1	1	1	240	26.8	4.73	2.11	1	0	High	1	Hepatoma-derived growth factor
HDHD5	Q9BXW7	3	1	1	1	423	46.3	8.13	3.18	1	0	High	1	Cat eye syndrome critical region protein 5
HECD3	Q5T447	2	2	3	2	861	97.1	5.64	0	2	0	Medium	1	E3 ubiquitin-protein ligase HECTD3
HELQ	Q8TDG4	3	2	2	2	1101	124.1	6.58	0	2	0	Medium	1	Helicase POLQ-like
HEM6	P36551	9	4	5	4	454	50.1	8.25	2.6	4	0	High	1	\Oxygen-dependent coproporphyrinogen-III oxidase, mitochondrial\""
HEMH	P22830	2	1	1	1	423	47.8	8.73	0	1	0	Medium	1	\Ferrochelatase, mitochondrial\""
HERC2	O95714	1	3	3	3	4834	526.9	6.28	0	3	0	Medium	1	E3 ubiquitin-protein ligase HERC2
HEXI1	O94992	7	2	2	2	359	40.6	4.89	1.98	2	0	High	1	Protein HEXIM1
HGFL	P26927	4	2	3	2	711	80.3	7.68	0	2	0	Medium	1	Putative macrophage stimulating 1-like protein
HHIP	Q96QV1	3	2	2	1	700	78.8	7.9	1.83	2	0	Medium	1	Hedgehog-interacting protein
HIBCH	Q6NVY1	5	2	2	2	386	43.5	8.19	0	2	0	Medium	1	\3-hydroxyisobutyryl-CoA hydrolase, mitochondrial\""
HIP1R	O75146	1	1	1	1	1068	119.3	6.67	0	1	0	Medium	1	Huntingtin-interacting protein 1-related protein
HIPK1	Q86Z02	2	2	2	2	1210	130.8	8.22	0	2	0	Medium	1	Homeodomain-interacting protein kinase 1
HIPL1	Q96JK4	1	1	1	1	782	86.7	7.58	0	1	0	Medium	1	HHIP-like protein 1
HIRP3	Q9BW71	2	1	1	1	556	61.9	8.54	0	1	0	Medium	1	HIRA-interacting protein 3
HLAA	P04439	16	4	4	4	365	40.8	6	6.29	4	0	High	1	\HLA class I histocompatibility antigen, A-3 alpha chain\""
HM13	Q8TCT9	5	2	4	2	377	41.5	6.43	1.91	2	0	High	1	Minor histocompatibility antigen H13
HMCN2	Q8NDA2	1	4	4	2	5059	541.6	5.87	1.65	4	0	Medium	1	Hemicentin-2
HMCS2	P54868	2	1	1	1	508	56.6	8.16	2.4	1	0	High	1	\Hydroxymethylglutaryl-CoA synthase, mitochondrial\""
HMGB2	P26583	15	3	3	1	209	24	7.81	7.29	3	0	High	1	High mobility group protein B1
HMGB3	O15347	7	1	1	1	200	23	8.37	2.22	1	0	High	1	High mobility group protein B3
HMHA1	Q92619	3	3	3	3	1136	124.5	6.1	0	3	0	Medium	1	Minor histocompatibility protein HA-1
HNRC1	O60812	21	7	10	1	293	32.1	5.06	21.14	7	0	Medium	1	Heterogeneous nuclear ribonucleoprotein C-like 1
HNRLL	Q8WVV9	6	3	3	3	542	60	7.72	4.47	3	0	High	1	Heterogeneous nuclear ribonucleoprotein L-like
HOME1	Q86YM7	12	2	2	2	354	40.3	5.44	0	2	0	Medium	1	Homer protein homolog 1
HOOK3	Q86VS8	1	1	2	1	718	83.1	5.17	0	1	0	Medium	1	Protein Hook homolog 3
HORM1	Q86X24	2	1	1	1	394	45.2	5.92	0	1	0	Medium	1	HORMA domain-containing protein 1
HPDL	Q96IR7	3	1	1	1	371	39.4	7.03	0	1	0	Medium	1	4-hydroxyphenylpyruvate dioxygenase-like protein
HPF1	Q9NWY4	3	1	1	1	346	39.4	6.8	0	1	0	Medium	1	Histone PARylation factor 1
HPIP	Q9NWW0	14	1	1	1	138	15.3	7.39	0	1	0	Medium	1	Host cell factor C1 regulator 1
HPSE2	Q8WWQ2	1	1	1	1	592	66.6	9.94	1.7	1	0	Medium	1	Inactive heparanase-2
HRH4	Q9H3N8	2	1	2	1	390	44.5	9.55	0	1	0	Medium	1	Histamine H4 receptor
HS105	Q92598	9	7	7	5	858	96.8	5.39	13.86	7	0	High	1	Heat shock protein 105 kDa
HS3S2	Q9Y278	8	3	3	3	367	41.5	9.89	0	3	0	Medium	1	Heparan sulfate glucosamine 3-O-sulfotransferase 2
HS71L	P34931	24	14	20	1	641	70.3	6.02	56.9	14	0	Medium	1	Heat shock 70 kDa protein 1-like
HS74L	O95757	12	8	8	6	839	94.5	5.88	16.32	8	0	High	1	Heat shock 70 kDa protein 4L
HSDL2	Q6YN16	3	1	1	1	418	45.4	7.99	3.07	1	0	High	1	Hydroxysteroid dehydrogenase-like protein 2
HSP7E	Q0VDF9	6	3	3	3	509	54.8	5.59	4.24	3	0	High	1	Heat shock 70 kDa protein 14
HSPB6	O14558	12	2	2	1	160	17.1	6.4	0	2	0	Medium	1	Heat shock protein beta-6
HTR5B	Q9P2D3	1	1	1	1	2071	224.2	7.17	0	1	0	Medium	1	HEAT repeat-containing protein 5B
HTSF1	O43719	3	2	2	1	755	85.8	4.4	0	2	0	Medium	1	HIV Tat-specific factor 1
HUTI	Q96NU7	6	2	2	2	426	46.7	6.61	0	2	0	Medium	1	Probable imidazolonepropionase
HUTU	Q96N76	2	1	1	1	676	74.8	6.79	0	1	0	Medium	1	Urocanate hydratase
HV320	A0A0C4DH32	9	1	1	1	117	12.7	7.87	0	1	0	Medium	1	Immunoglobulin heavy variable 3-23
HV434	P06331	7	1	1	1	123	13.8	9.33	0	1	0	Medium	1	Immunoglobulin heavy variable 4-34
HXB9	P17482	3	1	1	1	250	28	8.9	0	1	0	Medium	1	Homeobox protein Hox-B9
HXD8	P13378	3	1	1	1	290	31.9	8.5	0	1	0	Medium	1	Homeobox protein Hox-D8
HXK4	P35557	5	3	3	2	465	52.2	5.2	1.67	3	0	Medium	1	Glucokinase
HYCCI	Q9BYI3	4	2	2	2	521	57.6	8.16	0	2	0	Medium	1	Hyccin
HYPK	Q9NX55	7	1	1	1	121	13.6	4.82	2.13	1	0	High	1	Huntingtin-interacting protein K
I27RA	Q6UWB1	3	1	1	1	636	69.4	5.71	0	1	0	Medium	1	Interleukin-27 receptor subunit alpha
I2BP2	Q7Z5L9	3	2	2	2	587	61	8.69	4.03	2	0	High	1	Interferon regulatory factor 2-binding protein 2
IBP6	P24592	5	1	1	1	240	25.3	7.81	0	1	0	Medium	1	Insulin-like growth factor-binding protein 6
ICA69	Q05084	1	1	1	1	483	54.6	5.81	1.61	1	0	Medium	1	Islet cell autoantigen 1
ICAL	P20810	5	2	2	2	708	76.5	5.07	3.75	2	0	High	1	Calpastatin
ICAM2	P13598	5	1	1	1	275	30.6	7.43	0	1	0	Medium	1	Intercellular adhesion molecule 2
IDE	P14735	3	4	4	3	1019	117.9	6.61	5.66	4	0	High	1	Insulin-degrading enzyme
IDH3A	P50213	13	4	4	4	366	39.6	6.92	11	4	0	High	1	\Isocitrate dehydrogenase [NAD] subunit alpha, mitochondrial\""
IDH3B	O43837	13	4	4	4	385	42.2	8.46	6.12	4	0	High	1	\Isocitrate dehydrogenase [NAD] subunit beta, mitochondrial\""
IDHP	P48735	24	11	11	11	452	50.9	8.69	15.09	11	0	High	1	\Isocitrate dehydrogenase [NADP], mitochondrial\""
IDI1	Q13907	6	1	1	1	227	26.3	6.34	0	1	0	Medium	1	Isopentenyl-diphosphate Delta-isomerase 1
IF172	Q9UG01	0	1	1	1	1749	197.5	6.13	1.63	1	0	Medium	1	Intraflagellar transport protein 172 homolog
IF2B1	Q9NZI8	12	6	9	4	577	63.4	9.2	16.62	6	0	High	1	Insulin-like growth factor 2 mRNA-binding protein 1
IF2B2	Q9Y6M1	20	9	12	8	599	66.1	8.46	18.03	9	0	High	1	Insulin-like growth factor 2 mRNA-binding protein 2
IF4E3	Q8N5X7	3	1	1	1	224	24.4	6.42	0	1	0	Medium	1	Eukaryotic translation initiation factor 4E type 3
IFAS1	Q96M15	13	2	2	1	143	16	9.29	0	2	0	Medium	1	Putative uncharacterized protein IGF2BP2-AS1
IFIT3	O14879	7	3	3	2	490	56	5.2	1.64	3	0	Medium	1	Interferon-induced protein with tetratricopeptide repeats 3
IFRD2	Q12894	2	1	1	1	442	48	6.84	1.99	1	0	High	1	Interferon-related developmental regulator 2
IFT80	Q9P2H3	1	1	1	1	777	88	7.69	0	1	0	Medium	1	Intraflagellar transport protein 80 homolog
IFT81	Q8WYA0	3	2	3	2	676	79.7	8.82	0	2	0	Medium	1	Intraflagellar transport protein 81 homolog
IGBP1	P78318	4	1	1	1	339	39.2	5.38	0	1	0	Medium	1	Immunoglobulin-binding protein 1
IGSF3	O75054	1	2	2	1	1194	135.1	6.07	0	2	0	Medium	1	Immunoglobulin superfamily member 3
IGSF5	Q9NSI5	3	1	1	1	407	44.6	7.8	0	1	0	Medium	1	Immunoglobulin superfamily member 5
IKBL1	Q9UBC1	2	1	1	1	381	43.2	7.56	1.76	1	0	Medium	1	NF-kappa-B inhibitor-like protein 1
IL17B	Q9UHF5	13	2	4	2	180	20.4	9.23	0	2	0	Medium	1	Interleukin-17B
IL27A	Q8NEV9	3	1	1	1	243	27.5	6.65	0	1	0	Medium	1	Interleukin-27 subunit alpha
IL36B	Q9NZH7	10	1	1	1	164	18.5	9.52	0	1	0	Medium	1	Interleukin-36 beta
ILKAP	Q9H0C8	4	2	2	2	392	42.9	7.09	0	2	0	Medium	1	Integrin-linked kinase-associated serine/threonine phosphatase 2C
IMA1	P52292	9	3	3	3	529	57.8	5.4	5.44	3	0	High	1	Importin subunit alpha-1
IMA5	P52294	15	7	7	1	538	60.2	5.01	10.06	7	0	Medium	1	Importin subunit alpha-5
IMA7	O60684	15	7	7	1	536	60	4.98	12.33	7	0	High	1	Importin subunit alpha-7
IMB1	Q14974	13	10	13	10	876	97.1	4.78	29.43	10	0	High	1	Importin subunit beta-1
IMDH1	P20839	10	5	5	4	514	55.4	6.9	7.56	5	0	High	1	Inosine-5'-monophosphate dehydrogenase 1
INADL	Q8NI35	1	3	3	3	1801	196.2	4.94	0	3	0	Medium	1	InaD-like protein
INCE	Q9NQS7	2	2	2	2	918	105.4	9.44	0	2	0	Medium	1	Inner centromere protein
INGR1	P15260	2	1	1	1	489	54.4	4.91	2.09	1	0	High	1	Interferon gamma receptor 1
INT1	Q8N201	1	2	2	2	2190	244.1	6.13	0	2	0	Medium	1	Integrator complex subunit 1
INT10	Q9NVR2	3	1	1	1	710	82.2	7.44	0	1	0	Medium	1	Integrator complex subunit 10
INT2	Q9H0H0	1	1	1	1	1204	134.2	6.05	0	1	0	Medium	1	Integrator complex subunit 2
IPO4	Q8TEX9	2	2	2	2	1081	118.6	4.96	1.98	2	0	High	1	Importin-4
IPO5	O00410	14	13	14	13	1097	123.6	4.94	29.69	13	0	High	1	Importin-5
IPO8	O15397	3	3	3	2	1037	119.9	5.16	6.57	3	0	High	1	Importin-8
IPO9	Q96P70	2	1	1	1	1041	115.9	4.81	2.65	1	0	High	1	Importin-9
IPYR2	Q9H2U2	7	2	2	2	334	37.9	7.39	2.77	2	0	High	1	\Inorganic pyrophosphatase 2, mitochondrial\""
IQEC2	Q5JU85	3	4	4	4	1488	162.7	8.56	2.07	4	0	High	1	IQ motif and SEC7 domain-containing protein 2
IRGQ	Q8WZA9	1	1	1	1	623	62.7	4.88	0	1	0	Medium	1	Immunity-related GTPase family Q protein
IRPL2	Q9NP60	1	1	1	1	686	78.6	6.46	0	1	0	Medium	1	X-linked interleukin-1 receptor accessory protein-like 2
ISK5	Q9NQ38	3	2	2	2	1064	120.6	8.06	0	2	0	Medium	1	Serine protease inhibitor Kazal-type 5
ISOC1	Q96CN7	4	1	1	1	298	32.2	7.39	1.94	1	0	High	1	Isochorismatase domain-containing protein 1
ISPD	A4D126	3	1	1	1	451	49.8	6.25	0	1	0	Medium	1	Isoprenoid synthase domain-containing protein
ITA10	O75578	1	2	2	2	1167	127.5	6.68	0	2	0	Medium	1	Integrin alpha-10
ITA7	Q13683	2	2	2	2	1181	128.9	5.73	0	2	0	Medium	1	Integrin alpha-7
ITA8	P53708	1	1	1	1	1063	117.4	5.58	0	1	0	Medium	1	Integrin alpha-8
ITAV	P06756	2	2	2	2	1048	116	5.68	0	2	0	Medium	1	Integrin alpha-8
ITF2	P15884	5	2	2	2	667	71.3	7.01	0	2	0	Medium	1	Transcription factor 4
ITGBL	O95965	2	1	2	1	494	53.9	5.64	0	1	0	Medium	1	Integrin beta-like protein 1
ITIH1	P19827	1	1	1	1	911	101.3	6.79	0	1	0	Medium	1	Inter-alpha-trypsin inhibitor heavy chain H1
ITLN1	Q8WWA0	5	1	2	1	313	34.9	6.01	1.66	1	0	Medium	1	Intelectin-1
ITM2A	O43736	2	1	1	1	263	29.7	5.8	0	1	0	Medium	1	Integral membrane protein 2A
ITPA	Q9BY32	6	1	1	1	194	21.4	5.66	0	1	0	Medium	1	Inosine triphosphate pyrophosphatase
ITPI2	P28290	1	1	1	1	1259	138.3	5.19	0	1	0	Medium	1	Sperm-specific antigen 2
ITPR1	Q14643	1	4	5	2	2758	313.7	6.04	1.83	4	0	Medium	1	\Inositol 1,4,5-trisphosphate receptor type 1\""
ITPR2	Q14571	2	4	4	2	2701	307.9	6.43	1.83	4	0	Medium	1	\Inositol 1,4,5-trisphosphate receptor type 2\""
IWS1	Q96ST2	2	1	1	1	819	91.9	4.69	0	1	0	Medium	1	Protein IWS1 homolog
JADE1	Q6IE81	2	1	1	1	842	95.5	7.91	0	1	0	Medium	1	Protein Jade-1
JADE2	Q9NQC1	1	1	1	1	790	87.4	5.26	0	1	0	Medium	1	Protein Jade-2
JAK1	P23458	1	1	1	1	1154	133.2	7.55	0	1	0	Medium	1	Tyrosine-protein kinase JAK1
JARD2	Q92833	1	1	1	1	1246	138.6	9.38	0	1	0	Medium	1	Protein Jumonji
JHD2C	Q15652	1	1	1	1	2540	284.3	7.87	0	1	0	Medium	1	Probable JmjC domain-containing histone demethylation protein 2C
JKIP2	Q96AA8	3	2	2	2	810	94.9	6.16	0	2	0	Medium	1	Janus kinase and microtubule-interacting protein 2
JMY	Q8N9B5	3	3	3	3	988	111.4	6.18	0	3	0	Medium	1	Junction-mediating and -regulatory protein
JUNB	P17275	2	1	1	1	347	35.9	9.22	0	1	0	Medium	1	Transcription factor jun-B
JUNO	A6ND01	5	1	1	1	250	28.7	6.27	0	1	0	Medium	1	Sperm-egg fusion protein Juno
K0825	Q8IV33	1	1	1	1	1275	147.6	6.61	1.7	1	0	Medium	1	Uncharacterized protein KIAA0825
K1908	Q96PY0	7	1	1	1	264	28.2	11.15	0	1	0	Medium	1	Putative uncharacterized protein PSMG3-AS1
K2013	Q8IYS2	2	1	1	1	634	69.1	8.19	0	1	0	Medium	1	Uncharacterized protein KIAA2013
K2026	Q5HYC2	2	4	4	4	2103	227.9	9.04	0	4	0	Medium	1	Uncharacterized protein KIAA2026
K2C7	P08729	14	9	13	1	469	51.4	5.48	22.49	9	0	Medium	1	\Keratin, type II cytoskeletal 7\""
K2C73	Q86Y46	4	3	4	1	540	58.9	7.23	4.15	3	0	Medium	1	\Keratin, type II cytoskeletal 71\""
K2C74	Q7RTS7	8	4	5	2	529	57.8	7.71	4.15	4	0	Medium	1	\Keratin, type II cytoskeletal 74\""
KAD3	Q9UIJ7	4	1	2	1	227	25.6	9.16	1.83	1	0	Medium	1	\GTP:AMP phosphotransferase AK3, mitochondrial\""
KAD4	P27144	4	1	1	1	223	25.3	8.4	0	1	0	Medium	1	\Adenylate kinase 4, mitochondrial\""
KAD9	Q5TCS8	2	4	5	2	1911	221.3	5.01	0	4	0	Medium	1	Adenylate kinase 9
KAISO	Q86T24	2	1	1	1	672	74.4	5.12	0	1	0	Medium	1	Transcriptional regulator Kaiso
KALRN	O60229	0	2	3	1	2986	340	6.07	0	2	0	Medium	1	Kalirin
KANK2	Q63ZY3	2	2	2	2	851	91.1	5.63	0	2	0	Medium	1	KN motif and ankyrin repeat domain-containing protein 2
KAT2B	Q92831	3	2	2	1	832	93	9.01	1.6	2	0	Medium	1	Histone acetyltransferase KAT2B
KAT6A	Q92794	1	2	2	2	2004	224.9	5.68	1.65	2	0	Medium	1	Histone acetyltransferase KAT6A
KATL1	Q9BW62	2	1	1	1	490	55.4	6.74	1.65	1	0	Medium	1	Katanin p60 ATPase-containing subunit A-like 1
KBTB7	Q8WVZ9	1	1	1	1	684	77.1	5.57	0	1	0	Medium	1	Kelch repeat and BTB domain-containing protein 7
KBTBB	O94819	3	2	3	1	623	65.7	6.07	0	2	0	Medium	1	Kelch repeat and BTB domain-containing protein 11
KC1AL	Q8N752	5	2	2	2	337	39.1	9.45	1.83	2	0	Medium	1	Casein kinase I isoform alpha-like
KC1D	P48730	2	1	1	1	415	47.3	9.74	0	1	0	Medium	1	Casein kinase I isoform epsilon
KCAB1	Q14722	9	1	1	1	419	46.5	8.94	0	1	0	Medium	1	Voltage-gated potassium channel subunit beta-1
KCC2D	Q13557	1	1	2	1	499	56.3	7.25	0	1	0	Medium	1	Calcium/calmodulin-dependent protein kinase type II subunit alpha
KCD16	Q68DU8	3	1	1	1	428	49.1	8.09	0	1	0	Medium	1	BTB/POZ domain-containing protein KCTD16
KCJ11	Q14654	5	1	1	1	390	43.5	8.37	0	1	0	Medium	1	ATP-sensitive inward rectifier potassium channel 11
KCJ13	O60928	5	1	2	1	360	40.5	6.27	0	1	0	Medium	1	Inward rectifier potassium channel 13
KCNA4	P22459	1	1	1	1	653	73.2	5.17	0	1	0	Medium	1	Potassium voltage-gated channel subfamily A member 4
KCNB2	Q92953	1	1	1	1	911	102.5	6.14	0	1	0	Medium	1	Potassium voltage-gated channel subfamily B member 2
KCND2	Q9NZV8	2	1	1	1	630	70.5	7.97	0	1	0	Medium	1	Potassium voltage-gated channel subfamily D member 2
KCNG4	Q8TDN1	1	1	1	1	519	58.9	6.68	0	1	0	Medium	1	Potassium voltage-gated channel subfamily G member 4
KCNJ5	P48544	3	1	1	1	419	47.6	5.36	0	1	0	Medium	1	G protein-activated inward rectifier potassium channel 4
KCNQ1	P51787	1	1	1	1	676	74.7	9.86	0	1	0	Medium	1	Potassium voltage-gated channel subfamily KQT member 1
KCRU	P12532	21	9	10	8	417	47	8.34	20.3	9	0	High	1	\Creatine kinase U-type, mitochondrial\""
KDM1A	O60341	2	1	1	1	852	92.8	6.52	0	1	0	Medium	1	Lysine-specific histone demethylase 1A
KDM1B	Q8NB78	3	2	2	2	822	92	7.87	0	2	0	Medium	1	Lysine-specific histone demethylase 1B
KDM3A	Q9Y4C1	1	1	1	1	1321	147.2	8.07	0	1	0	Medium	1	Lysine-specific demethylase 3A
KDM4B	O94953	1	1	1	1	1096	121.8	7.09	0	1	0	Medium	1	Lysine-specific demethylase 4B
KDM5B	Q9UGL1	1	1	3	1	1544	175.5	6.7	0	1	0	Medium	1	Lysine-specific demethylase 5B
KDM6A	O15550	2	1	1	1	1401	154.1	7.44	2.11	1	0	Medium	1	Histone demethylase UTY
KGP2	Q13237	2	1	1	1	762	87.4	8.47	0	1	0	Medium	1	cGMP-dependent protein kinase 2
KHDR3	O75525	12	5	6	1	346	38.8	7.61	7.56	5	0	Medium	1	\KH domain-containing, RNA-binding, signal transduction-associated protein 2\""
KI13B	Q9NQT8	1	1	1	1	1826	202.7	5.88	0	1	0	Medium	1	Kinesin-like protein KIF13B
KIF19	Q2TAC6	2	2	2	2	998	111.3	8.69	0	2	0	Medium	1	Kinesin-like protein KIF19
KIF2A	O00139	4	3	3	3	706	79.9	6.68	2.1	3	0	High	1	Kinesin-like protein KIF2A
KIF3C	O14782	1	1	1	1	793	89.4	8.37	1.62	1	0	Medium	1	Kinesin-like protein KIF3C
KIF4A	O95239	1	2	2	2	1232	139.8	6.27	0	2	0	Medium	1	Chromosome-associated kinesin KIF4A
KIF5C	O60282	3	3	3	1	957	109.4	6.19	2.93	3	0	Medium	1	Kinesin-1 heavy chain
KIF7	Q2M1P5	1	2	2	1	1343	150.5	6.79	1.78	2	0	Medium	1	Kinesin-like protein KIF7
KIRR2	Q6UWL6	1	1	1	1	708	75	6.73	0	1	0	Medium	1	Kin of IRRE-like protein 2
KITM	O00142	4	1	3	1	265	31	8.46	0	1	0	Medium	1	\Thymidine kinase 2, mitochondrial\""
KKCC2	Q96RR4	2	2	2	2	588	64.7	6.68	1.76	2	0	Medium	1	Calcium/calmodulin-dependent protein kinase kinase 2
KLC1	Q07866	7	4	4	2	573	65.3	6.2	1.61	4	0	Medium	1	Kinesin light chain 1
KLC2	Q9H0B6	8	4	4	2	622	68.9	7.15	0	4	0	Medium	1	Kinesin light chain 2
KLH11	Q9NVR0	1	1	1	1	708	80.1	6.16	0	1	0	Medium	1	Kelch-like protein 11
KLH17	Q6TDP4	1	1	2	1	642	69.8	7.71	0	1	0	Medium	1	Kelch-like protein 17
KLH26	Q53HC5	3	1	1	1	615	68.1	6.48	0	1	0	Medium	1	Kelch-like protein 26
KLH41	O60662	2	1	1	1	606	68	5.29	0	1	0	Medium	1	Kelch-like protein 41
KLHL6	Q8WZ60	2	1	1	1	621	70.3	6.29	0	1	0	Medium	1	Kelch-like protein 6
KLHL8	Q9P2G9	1	1	2	1	620	68.8	6.58	0	1	0	Medium	1	Kelch-like protein 8
KLK15	Q9H2R5	9	1	1	1	256	28.1	7.97	0	1	0	Medium	1	Kallikrein-8
KLK4	Q9Y5K2	5	1	1	1	254	27	4.92	0	1	0	Medium	1	Kallikrein-4
KLOTB	Q86Z14	1	2	2	1	1044	119.7	9.22	0	2	0	Medium	1	Beta-klotho
KMT2A	Q03164	0	1	1	1	3969	431.5	9.09	0	1	0	Medium	1	Histone-lysine N-methyltransferase 2A
KMT2C	Q8NEZ4	1	2	2	2	4911	541	6.49	0	2	0	Medium	1	Histone-lysine N-methyltransferase 2C
KMT2E	Q8IZD2	1	2	2	2	1858	204.8	7.61	0	2	0	Medium	1	Histone-lysine N-methyltransferase 2E
KPB1	P46020	4	5	5	5	1223	137.2	6.19	4.57	5	0	High	1	\Phosphorylase b kinase regulatory subunit alpha, skeletal muscle isoform\""
KPCD2	Q9BZL6	2	2	2	1	878	96.7	6.84	0	2	0	Medium	1	Serine/threonine-protein kinase D2
KPRB	O60256	2	1	2	1	369	40.9	7.44	0	1	0	Medium	1	Phosphoribosyl pyrophosphate synthase-associated protein 2
KRI1	Q8N9T8	5	3	3	2	703	82.5	5.14	0	3	0	Medium	1	Protein KRI1 homolog
KRIT1	O00522	2	2	2	2	736	84.3	8.41	0	2	0	Medium	1	Krev interaction trapped protein 1
KS6A1	Q15418	8	5	5	3	735	82.7	7.83	9.16	5	0	High	1	Ribosomal protein S6 kinase alpha-3
KS6A4	O75676	2	2	2	1	772	85.6	8.28	0	2	0	Medium	1	Ribosomal protein S6 kinase alpha-4
KS6B2	Q9UBS0	2	1	1	1	482	53.4	7.34	0	1	0	Medium	1	Ribosomal protein S6 kinase beta-1
KSYK	P43405	3	3	3	3	635	72	8.25	0	3	0	Medium	1	Tyrosine-protein kinase SYK
KTHY	P23919	4	1	1	1	212	23.8	8.27	0	1	0	Medium	1	Thymidylate kinase
KVD13	A0A0B4J2D9	16	1	1	1	117	12.6	7.84	0	1	0	Medium	1	Immunoglobulin kappa variable 1-5
L2GL2	Q6P1M3	1	1	1	1	1020	113.4	7.52	0	1	0	Medium	1	Lethal(2) giant larvae protein homolog 2
L2HDH	Q9H9P8	3	1	1	1	463	50.3	8.15	2.33	1	0	High	1	\L-2-hydroxyglutarate dehydrogenase, mitochondrial\""
L37A1	A6NMS7	2	2	2	2	1700	188.1	5.49	0	2	0	Medium	1	Leucine-rich repeat-containing protein 37A
L37A5	Q49AS3	9	1	1	1	106	12.6	9.99	0	1	0	Medium	1	Putative protein LRRC37A5P
LACTB	P83111	5	2	2	2	547	60.7	8.53	0	2	0	Medium	1	\Serine beta-lactamase-like protein LACTB, mitochondrial\""
LAMA3	Q16787	0	1	1	1	3333	366.4	7.24	1.74	1	0	Medium	1	Laminin subunit alpha-3
LAMB1	P07942	2	3	3	3	1786	197.9	4.94	0	3	0	Medium	1	Laminin subunit beta-1
LAMB2	P55268	1	1	1	1	1798	195.9	6.52	0	1	0	Medium	1	Laminin subunit beta-2
LAMC3	Q9Y6N6	1	1	1	1	1575	171.1	6.58	0	1	0	Medium	1	Laminin subunit gamma-3
LAMP2	P13473	7	2	2	2	410	44.9	5.63	2.62	2	0	High	1	Lysosome-associated membrane glycoprotein 2
LANC3	Q6ZV70	4	1	1	1	420	46.3	7.09	0	1	0	Medium	1	LanC-like protein 3
LAR4B	Q92615	2	2	3	2	738	80.5	6.92	0	2	0	Medium	1	La-related protein 4B
LARP7	Q4G0J3	2	1	1	1	582	66.9	9.55	0	1	0	Medium	1	La-related protein 7
LAS1L	Q9Y4W2	2	1	2	1	734	83	4.73	4.84	1	0	High	1	Ribosomal biogenesis protein LAS1L
LASP1	Q14847	8	2	2	2	261	29.7	7.05	4.02	2	0	High	1	LIM and SH3 domain protein 1
LAT1	Q01650	5	2	2	2	507	55	7.72	2.43	2	0	High	1	Large neutral amino acids transporter small subunit 1
LCA5L	O95447	2	1	1	1	670	76.5	9.48	0	1	0	Medium	1	Lebercilin-like protein
LCAP	Q9UIQ6	3	3	3	3	1025	117.3	5.73	4.04	3	0	High	1	Leucyl-cystinyl aminopeptidase
LDB3	O75112	2	1	1	1	727	77.1	8.13	0	1	0	Medium	1	LIM domain-binding protein 3
LDLR	P01130	3	3	3	3	860	95.3	5.05	0	3	0	Medium	1	Low-density lipoprotein receptor
LEG3	P17931	9	2	2	2	250	26.1	8.56	2.59	2	0	High	1	Galectin-3
LENG8	Q96PV6	4	3	3	3	800	88.1	9.11	0	3	0	Medium	1	Leukocyte receptor cluster member 8
LEO1	Q8WVC0	2	1	1	1	666	75.4	4.51	1.98	1	0	High	1	RNA polymerase-associated protein LEO1
LETM1	O95202	34	22	24	22	739	83.3	6.7	48.66	22	0	High	1	\LETM1 and EF-hand domain-containing protein 1, mitochondrial\""
LETM2	Q2VYF4	3	1	1	1	491	55.9	9.23	0	1	0	Medium	1	\LETM1 domain-containing protein LETM2, mitochondrial\""
LFA3	P19256	4	1	1	1	250	28.1	6.76	2.32	1	0	High	1	Lymphocyte function-associated antigen 3
LGI2	Q8N0V4	1	1	1	1	545	62.3	6.93	0	1	0	Medium	1	Leucine-rich repeat LGI family member 2
LGUL	Q04760	8	2	2	2	184	20.8	5.31	3.4	2	0	Medium	1	Lactoylglutathione lyase
LIGO2	Q7L985	1	1	1	1	606	68	8.13	0	1	0	Medium	1	Leucine-rich repeat and immunoglobulin-like domain-containing nogo receptor-interacting protein 2
LIME1	Q9H400	14	1	1	1	295	31.3	9.58	0	1	0	Medium	1	Zinc finger CCCH-type with G patch domain-containing protein
LIMS1	P48059	4	1	1	1	325	37.2	8.05	2.19	1	0	High	1	LIM and senescent cell antigen-like-containing domain protein 1
LIN41	Q2Q1W2	2	1	1	1	868	93.3	7.61	0	1	0	Medium	1	E3 ubiquitin-protein ligase TRIM71
LIPA4	O75335	3	2	2	2	1185	134.3	6.74	0	2	0	Medium	1	Liprin-alpha-4
LIPT	Q9Y234	6	1	1	1	373	42.5	8.37	0	1	0	Medium	1	\Lipoyltransferase 1, mitochondrial\""
LIRB5	O75023	2	1	1	1	590	64	7.14	0	1	0	Medium	1	Leukocyte immunoglobulin-like receptor subfamily B member 3
LIS1	P43034	8	3	3	2	410	46.6	7.37	1.89	3	0	Medium	1	Platelet-activating factor acetylhydrolase IB subunit alpha
LKAM1	Q8TD35	5	1	1	1	194	21.5	10.61	0	1	0	Medium	1	Protein LKAAEAR1
LKHA4	P09960	20	10	10	10	611	69.2	6.18	18.12	10	0	High	1	Leukotriene A-4 hydrolase
LMAN2	Q12907	8	3	3	3	356	40.2	6.95	6.45	3	0	High	1	Vesicular integral-membrane protein VIP36
LMF1	Q96S06	1	1	1	1	567	64.8	9.31	0	1	0	Medium	1	Lipase maturation factor 1
LMO7	Q8WWI1	1	3	4	2	1683	192.6	8.09	1.61	3	0	Medium	1	LIM domain only protein 7
LONF3	Q496Y0	3	2	2	2	759	84.4	7.25	0	2	0	Medium	1	LON peptidase N-terminal domain and RING finger protein 3
LORF2	O00370	1	1	1	1	1275	148.9	9.66	0	1	0	Medium	1	LINE-1 retrotransposable element ORF2 protein
LPAR5	Q9H1C0	2	1	1	1	372	41.3	10.18	0	1	0	Medium	1	Lysophosphatidic acid receptor 5
LPP	Q93052	1	1	1	1	612	65.7	7.37	0	1	0	Medium	1	Lipoma-preferred partner
LQK1	Q8TAF5	13	1	1	1	88	10	11.37	1.91	1	0	High	1	Putative uncharacterized protein LQK1
LR74A	Q0VAA2	2	1	1	1	488	54.5	5.34	0	1	0	Medium	1	Leucine-rich repeat-containing protein 74A
LRA25	Q8N5H3	4	1	1	1	189	20.1	5.34	0	1	0	Medium	1	Protein FAM89B
LRC24	Q50LG9	2	1	1	1	513	55.2	8.91	0	1	0	Medium	1	Leucine-rich repeat-containing protein 24
LRC31	Q6UY01	3	1	1	1	552	61.5	6.02	0	1	0	Medium	1	Leucine-rich repeat-containing protein 31
LRC40	Q9H9A6	2	1	1	1	602	68.2	6.43	0	1	0	Medium	1	Leucine-rich repeat-containing protein 40
LRC47	Q8N1G4	13	6	6	6	583	63.4	8.28	15.45	6	0	High	1	Leucine-rich repeat-containing protein 47
LRC71	Q8N4P6	3	2	2	1	559	61.8	9.22	0	2	0	Medium	1	Leucine-rich repeat-containing protein 71
LRC72	A6NJI9	5	1	1	1	287	33.6	8.76	0	1	0	Medium	1	Leucine-rich repeat-containing protein 72
LRCH1	Q9Y2L9	2	1	1	1	728	80.8	5.94	0	1	0	Medium	1	Leucine-rich repeat and calponin homology domain-containing protein 1
LRCH2	Q5VUJ6	1	1	2	1	765	84.5	6.55	0	1	0	Medium	1	Leucine-rich repeat and calponin homology domain-containing protein 2
LRFN4	Q6PJG9	1	1	1	1	635	66.8	6.92	0	1	0	Medium	1	Leucine-rich repeat and fibronectin type-III domain-containing protein 4
LRIQ1	Q96JM4	3	4	4	4	1722	199.2	6.19	0	4	0	Medium	1	Leucine-rich repeat and IQ domain-containing protein 1
LRIQ3	A6PVS8	4	2	3	2	624	73.6	9.72	1.77	2	0	Medium	1	Leucine-rich repeat and IQ domain-containing protein 3
LRIQ4	A6NIV6	2	1	1	1	560	63.9	8.19	0	1	0	Medium	1	Leucine-rich repeat and IQ domain-containing protein 4
LRIT1	Q9P2V4	2	1	1	1	623	68	8.54	0	1	0	Medium	1	\Leucine-rich repeat, immunoglobulin-like domain and transmembrane domain-containing protein 1\""
LRP1	Q07954	0	1	1	1	4544	504.3	5.39	1.9	1	0	High	1	Prolow-density lipoprotein receptor-related protein 1
LRP2	P98164	1	4	4	4	4655	521.6	5.08	0	4	0	Medium	1	Low-density lipoprotein receptor-related protein 2
LRP8	Q14114	3	2	3	2	963	105.6	5.05	0	2	0	Medium	1	Low-density lipoprotein receptor-related protein 8
LRRD1	A4D1F6	2	2	2	2	860	98	7.46	0	2	0	Medium	1	Leucine-rich repeat and death domain-containing protein 1
LRRF1	Q32MZ4	4	3	3	3	808	89.2	4.65	2.29	3	0	High	1	Leucine-rich repeat flightless-interacting protein 1
LRRN2	O75325	1	1	1	1	713	78.8	7.42	0	1	0	Medium	1	Leucine-rich repeat neuronal protein 2
LRSM1	Q6UWE0	1	1	1	1	723	83.5	5.94	0	1	0	Medium	1	E3 ubiquitin-protein ligase LRSAM1
LRWD1	Q9UFC0	4	2	2	2	647	70.8	7.21	0	2	0	Medium	1	Leucine-rich repeat and WD repeat-containing protein 1
LS14A	Q8ND56	7	3	3	3	463	50.5	9.52	2.2	3	0	High	1	Protein LSM14 homolog A
LSG1	Q9H089	5	4	4	4	658	75.2	6.38	5.43	4	0	High	1	Large subunit GTPase 1 homolog
LSM4	Q9Y4Z0	12	2	2	2	139	15.3	9.99	0	2	0	Medium	1	U6 snRNA-associated Sm-like protein LSm4
LSS	P48449	6	4	4	4	732	83.3	6.61	9.16	4	0	High	1	Lanosterol synthase
LY6K	Q17RY6	8	1	1	1	165	18.7	7.43	0	1	0	Medium	1	Lymphocyte antigen 6K
M18BP	Q6P0N0	1	1	1	1	1132	129	9.25	0	1	0	Medium	1	Mis18-binding protein 1
M4K4	O95819	2	3	3	3	1239	142	7.46	1.91	3	0	High	1	Mitogen-activated protein kinase kinase kinase kinase 4
MA1A1	P33908	2	1	1	1	653	72.9	6.47	0	1	0	Medium	1	\Mannosyl-oligosaccharide 1,2-alpha-mannosidase IA\""
MAAS1	Q8N8E1	11	1	1	1	139	13.2	11.41	0	1	0	Medium	1	Putative uncharacterized protein encoded by MAPKAPK5-AS1
MABP1	O60336	1	2	3	1	1514	163.7	6.76	1.61	2	0	Medium	1	Mitogen-activated protein kinase-binding protein 1
MACD1	Q9BQ69	6	2	2	2	325	35.5	9.51	0	2	0	Medium	1	O-acetyl-ADP-ribose deacetylase MACROD1
MACF1	Q9UPN3	0	3	4	2	7388	837.8	5.39	1.98	3	0	High	1	\Microtubule-actin cross-linking factor 1, isoforms 1/2/3/5\""
MADD	Q8WXG6	2	3	3	3	1647	183.2	6.04	2.12	3	0	Medium	1	MAP kinase-activating death domain protein
MAFK	O60675	6	1	1	1	156	17.5	10.1	0	1	0	Medium	1	Transcription factor MafK
MAGAB	P43364	3	1	1	1	429	48.1	4.75	0	1	0	Medium	1	Melanoma-associated antigen 11
MAGL2	Q9UJ55	2	2	2	2	1249	132.7	9.51	0	2	0	Medium	1	MAGE-like protein 2
MAOM	P23368	12	6	6	5	584	65.4	7.61	16	6	0	High	1	\NAD-dependent malic enzyme, mitochondrial\""
MAON	Q16798	2	2	2	1	604	67	7.97	2.3	2	0	Medium	1	\NADP-dependent malic enzyme, mitochondrial\""
MAP12	Q6UB28	5	1	1	1	335	37.1	6.84	0	1	0	Medium	1	\Methionine aminopeptidase 1D, mitochondrial\""
MAP1S	Q66K74	3	3	3	3	1059	112.1	7.3	0	3	0	Medium	1	Microtubule-associated protein 1S
MAP2	P50579	13	5	5	5	478	52.9	5.82	10.5	5	0	High	1	Methionine aminopeptidase 2
MAP7	Q14244	6	5	5	5	749	84	9.61	8.13	5	0	High	1	Ensconsin
MARE1	Q15691	6	1	1	1	268	30	5.14	2.41	1	0	High	1	Microtubule-associated protein RP/EB family member 1
MARH9	Q86YJ5	2	1	1	1	346	37.7	9.13	0	1	0	Medium	1	E3 ubiquitin-protein ligase MARCH9
MARK2	Q7KZI7	6	3	3	3	788	87.9	9.72	0	3	0	Medium	1	Serine/threonine-protein kinase MARK2
MATN2	O00339	1	1	1	1	956	106.8	6.27	0	1	0	Medium	1	Matrilin-2
MAVS	Q7Z434	10	4	4	4	540	56.5	5.52	11.6	4	0	High	1	Mitochondrial antiviral-signaling protein
MBD5	Q9P267	0	1	1	1	1494	159.8	8.98	0	1	0	Medium	1	Methyl-CpG-binding domain protein 5
MBOA5	Q6P1A2	3	1	1	1	487	56	8.69	2.32	1	0	High	1	Lysophospholipid acyltransferase 5
MBP	P02686	7	1	1	1	304	33.1	9.79	0	1	0	Medium	1	Myelin basic protein
MBRL	Q4ZIN3	1	1	1	1	620	67.8	5.3	0	1	0	Medium	1	Membralin
MCCA	Q96RQ3	4	2	2	2	725	80.4	7.78	1.93	2	0	High	1	\Methylcrotonoyl-CoA carboxylase subunit alpha, mitochondrial\""
MCCB	Q9HCC0	21	10	12	10	563	61.3	7.68	28.05	10	0	High	1	\Methylcrotonoyl-CoA carboxylase beta chain, mitochondrial\""
MCCD1	P59942	8	1	2	1	119	13.3	8.05	0	1	0	Medium	1	Mitochondrial coiled-coil domain protein 1
MCES	O43148	2	1	1	1	476	54.8	6.61	2.08	1	0	High	1	mRNA cap guanine-N7 methyltransferase
MCM8	Q9UJA3	4	2	2	2	840	93.6	7.75	0	2	0	Medium	1	DNA helicase MCM8
MCP	P15529	8	3	3	3	392	43.7	6.74	5.87	3	0	High	1	Membrane cofactor protein
MCPH1	Q8NEM0	3	2	2	2	835	92.8	8.25	0	2	0	Medium	1	Microcephalin
MCR	P08235	1	1	1	1	984	107	7.39	0	1	0	Medium	1	Mineralocorticoid receptor
MCRI1	C9JLW8	14	1	1	1	97	10.9	9.41	0	1	0	Medium	1	Mapk-regulated corepressor-interacting protein 1
MCUR1	Q96AQ8	5	3	3	3	359	39.7	9.63	0	3	0	Medium	1	Mitochondrial calcium uniporter regulator 1
MDGA1	Q8NFP4	1	1	1	1	955	105.7	8.34	0	1	0	Medium	1	MAM domain-containing glycosylphosphatidylinositol anchor protein 1
MDM1	Q8TC05	3	2	2	2	714	80.7	9.11	0	2	0	Medium	1	Nuclear protein MDM1
MECP2	P51608	6	2	2	2	486	52.4	9.95	0	2	0	Medium	1	Methyl-CpG-binding protein 2
MEDAG	Q5VYS4	4	1	1	1	303	34.2	6.3	2.08	1	0	Medium	1	Mesenteric estrogen-dependent adipogenesis protein
MELK	Q14680	2	1	1	1	651	74.6	8.72	0	1	0	Medium	1	Maternal embryonic leucine zipper kinase
MEP50	Q9BQA1	4	1	1	1	342	36.7	5.17	1.97	1	0	High	1	Methylosome protein 50
MER34	Q9H9K5	4	1	1	1	563	63.5	7.87	0	1	0	Medium	1	Endogenous retrovirus group MER34 member 1 Env polyprotein
METK1	Q00266	2	2	2	1	395	43.6	6.29	0	2	0	Medium	1	S-adenosylmethionine synthase isoform type-1
METK2	P31153	8	3	4	2	395	43.6	6.48	7.31	3	0	High	1	S-adenosylmethionine synthase isoform type-2
MEX3B	Q6ZN04	1	1	1	1	569	58.8	6.9	0	1	0	Medium	1	RNA-binding protein MEX3B
MEX3C	Q5U5Q3	3	1	1	1	659	69.3	5	0	1	0	Medium	1	RNA-binding E3 ubiquitin-protein ligase MEX3C
MFN2	O95140	5	4	4	4	757	86.3	6.98	0	4	0	Medium	1	Mitofusin-2
MFS11	O43934	2	1	1	1	449	49.2	5.68	0	1	0	Medium	1	UNC93-like protein MFSD11
MGAT2	Q10469	3	1	1	1	447	51.5	8.76	0	1	0	Medium	1	\Alpha-1,6-mannosyl-glycoprotein 2-beta-N-acetylglucosaminyltransferase\""
MGDP1	Q86V88	5	1	1	1	176	20.1	6.39	0	1	0	Medium	1	Magnesium-dependent phosphatase 1
MGST2	Q99735	10	1	1	1	147	16.6	9.55	0	1	0	Medium	1	Microsomal glutathione S-transferase 2
MGT4B	Q9UQ53	2	1	1	1	548	63.2	7.87	0	1	0	Medium	1	\Alpha-1,3-mannosyl-glycoprotein 4-beta-N-acetylglucosaminyltransferase B\""
MGT5A	Q09328	1	1	1	1	741	84.5	8.12	0	1	0	Medium	1	\Alpha-1,6-mannosylglycoprotein 6-beta-N-acetylglucosaminyltransferase A\""
MIC27	Q6UXV4	6	1	1	1	268	29.1	9.52	0	1	0	Medium	1	MICOS complex subunit MIC27
MINK1	Q8N4C8	2	2	2	2	1332	149.7	7.85	0	2	0	Medium	1	Misshapen-like kinase 1
MINP1	Q9UNW1	5	1	3	1	487	55	7.81	0	1	0	Medium	1	Multiple inositol polyphosphate phosphatase 1
MINT	Q96T58	1	1	1	1	3664	402	7.64	0	1	0	Medium	1	Msx2-interacting protein
MIPEP	Q99797	1	1	1	1	713	80.6	7.05	0	1	0	Medium	1	Mitochondrial intermediate peptidase
MIRO1	Q8IXI2	1	1	1	1	618	70.7	6.27	2.38	1	0	High	1	Mitochondrial Rho GTPase 1
MIRO2	Q8IXI1	8	4	4	4	618	68.1	5.86	6.86	4	0	High	1	Mitochondrial Rho GTPase 1
MITOS	Q9NUT2	1	1	1	1	735	79.9	8.98	0	1	0	Medium	1	\ATP-binding cassette sub-family B member 8, mitochondrial\""
ML12B	O14950	12	2	2	2	172	19.8	4.84	5.99	2	0	High	1	Myosin regulatory light chain 12B
MLEC	Q14165	6	2	3	1	292	32.2	5.41	2.36	2	0	High	1	Malectin
MLH1	P40692	3	1	2	1	756	84.5	5.72	0	1	0	Medium	1	DNA mismatch repair protein Mlh1
MMAA	Q8IVH4	6	1	1	1	418	46.5	9.29	0	1	0	Medium	1	\Methylmalonic aciduria type A protein, mitochondrial\""
MMAD	Q9H3L0	3	1	1	1	296	32.9	5.29	0	1	0	Medium	1	\Methylmalonic aciduria and homocystinuria type D protein, mitochondrial\""
MMP21	Q8N119	2	1	1	1	569	65	9.11	0	1	0	Medium	1	Matrix metalloproteinase-21
MMP27	Q9H306	2	1	1	1	513	59	8.69	0	1	0	Medium	1	Matrix metalloproteinase-27
MMP3	P08254	3	2	2	2	477	53.9	6.16	0	2	0	Medium	1	Stromelysin-1
MMRN2	Q9H8L6	2	1	1	1	949	104.3	5.86	0	1	0	Medium	1	Multimerin-2
MMS19	Q96T76	1	1	1	1	1030	113.2	6.35	1.64	1	0	Medium	1	MMS19 nucleotide excision repair protein homolog
MMS22	Q6ZRQ5	2	2	2	2	1243	142.2	7.12	0	2	0	Medium	1	Protein MMS22-like
MMSA	Q02252	5	2	2	2	535	57.8	8.5	1.73	2	0	Medium	1	\Methylmalonate-semialdehyde dehydrogenase [acylating], mitochondrial\""
MNAR1	Q9UPX6	1	1	1	1	916	102.9	7.31	0	1	0	Medium	1	UPF0258 protein KIAA1024
MO2R1	Q8TD46	2	1	1	1	348	39	7.59	0	1	0	Medium	1	Cell surface glycoprotein CD200 receptor 1
MOB1A	Q9H8S9	5	1	1	1	216	25.1	6.95	0	1	0	Medium	1	MOB kinase activator 1A
MOC2B	O96007	10	1	1	1	188	20.9	5.44	0	1	0	Medium	1	Molybdopterin synthase catalytic subunit
MOCOS	Q96EN8	2	2	2	1	888	98.1	6.7	1.72	2	0	Medium	1	Molybdenum cofactor sulfurase
MOES	P26038	20	16	30	6	577	67.8	6.4	47.99	16	0	High	1	Radixin
MOGS	Q13724	5	3	3	3	837	91.9	8.9	5.14	3	0	High	1	Mannosyl-oligosaccharide glucosidase
MON1A	Q86VX9	1	1	1	1	652	72.8	8.18	0	1	0	Medium	1	Vacuolar fusion protein MON1 homolog A
MORC1	Q86VD1	3	3	3	3	984	112.8	7.85	0	3	0	Medium	1	MORC family CW-type zinc finger protein 1
MORC2	Q9Y6X9	2	1	1	1	1032	117.8	8.38	2.95	1	0	High	1	MORC family CW-type zinc finger protein 2
MORN3	Q6PF18	3	1	1	1	240	27.6	8.44	0	1	0	Medium	1	MORN repeat-containing protein 3
MOT1	P53985	7	3	3	3	500	53.9	8.66	7.31	3	0	High	1	Monocarboxylate transporter 1
MOT10	Q8TF71	1	1	1	1	515	55.5	7.69	0	1	0	Medium	1	Monocarboxylate transporter 10
MOV10	Q9HCE1	2	2	2	2	1003	113.6	8.82	0	2	0	Medium	1	Putative helicase MOV-10
MP2K3	P46734	6	2	2	2	347	39.3	7.43	1.71	2	0	Medium	1	Dual specificity mitogen-activated protein kinase kinase 3
MP2K7	O14733	2	1	1	1	419	47.5	9.16	0	1	0	Medium	1	Dual specificity mitogen-activated protein kinase kinase 7
MPIP1	P30304	5	3	3	3	524	59	6.95	0	3	0	Medium	1	M-phase inducer phosphatase 1
MPP2	Q14168	2	1	1	1	576	64.5	6.77	0	1	0	Medium	1	MAGUK p55 subfamily member 2
MPP7	Q5T2T1	2	1	1	1	576	65.5	7.14	0	1	0	Medium	1	MAGUK p55 subfamily member 7
MPP9	Q99550	1	1	1	1	1183	133	6.29	0	1	0	Medium	1	M-phase phosphoprotein 9
MRCKA	Q5VT25	1	3	3	2	1732	197.2	6.58	3.43	3	0	Medium	1	Serine/threonine-protein kinase MRCK alpha
MRCKB	Q9Y5S2	1	2	2	1	1711	194.2	6.37	1.76	2	0	Medium	1	Serine/threonine-protein kinase MRCK beta
MRCKG	Q6DT37	1	1	1	1	1551	172.4	6.28	2.26	1	0	Medium	1	Serine/threonine-protein kinase MRCK gamma
MRM1	Q6IN84	6	1	1	1	353	38.6	7.94	0	1	0	Medium	1	\rRNA methyltransferase 1, mitochondrial\""
MS3L2	P0C860	4	1	1	1	447	51	8.37	0	1	0	Medium	1	Putative male-specific lethal-3 protein-like 2
MSD1	Q6ZTZ1	3	1	1	1	278	31.6	8.82	0	1	0	Medium	1	Myb/SANT-like DNA-binding domain-containing protein 1
MSH4	O15457	1	1	1	1	936	104.7	7.37	0	1	0	Medium	1	MutS protein homolog 4
MSTO1	Q9BUK6	2	1	1	1	570	61.8	6.11	0	1	0	Medium	1	Protein misato homolog 1
MT25B	Q96FB5	1	1	1	1	475	52.9	7.97	1.71	1	0	Medium	1	Protein RRNAD1
MTA2	O94776	7	5	5	5	668	75	9.66	5.19	5	0	High	1	Metastasis-associated protein MTA2
MTCH1	Q9NZJ7	3	1	1	1	389	41.5	9.32	0	1	0	Medium	1	Mitochondrial carrier homolog 1
MTCL1	Q9Y4B5	2	3	4	2	1905	209.4	6.43	0	3	0	Medium	1	Microtubule cross-linking factor 1
MTEF1	Q99551	3	1	2	1	399	45.7	9.42	0	1	0	Medium	1	\Transcription termination factor 1, mitochondrial\""
MTL5	Q9Y4I5	2	1	1	1	508	55	5.71	0	1	0	Medium	1	Tesmin
MTX2	O75431	9	2	2	2	263	29.7	6.29	0	2	0	Medium	1	Metaxin-2
MUC16	Q8WXI7	0	2	2	2	14507	1518.2	5.26	0	2	0	Medium	1	Mucin-16
MUT7	Q8N9H8	1	1	1	1	876	96.5	8.22	0	1	0	Medium	1	Exonuclease mut-7 homolog
MX1	P20591	16	12	12	12	662	75.5	5.83	19.43	12	0	High	1	Interferon-induced GTP-binding protein Mx1
MYB	P10242	2	1	2	1	640	72.3	6.83	0	1	0	Medium	1	Transcriptional activator Myb
MYCB2	O75592	1	4	4	3	4678	513.3	7.02	0	4	0	Medium	1	E3 ubiquitin-protein ligase MYCBP2
MYCD	Q8IZQ8	4	2	2	2	938	101.9	6.62	0	2	0	Medium	1	Myocardin
MYCOS	A0A1B0GUC4	10	1	1	1	108	12	9.04	0	1	0	Medium	1	.
MYDGF	Q969H8	5	1	1	1	173	18.8	6.68	0	1	0	Medium	1	Myeloid-derived growth factor
MYEF2	Q9P2K5	3	2	3	2	600	64.1	8.75	0	2	0	Medium	1	Myelin expression factor 2
MYH1	P12882	4	6	8	3	1939	223	5.74	1.81	6	0	Medium	1	Myosin-1
MYH4	Q9Y623	2	4	5	1	1939	222.9	5.85	4.05	4	0	Medium	1	Myosin-4
MYH6	P13533	1	4	5	1	1939	223.6	5.73	1.81	4	0	Medium	1	Myosin-6
MYL3	P08590	8	1	1	1	195	21.9	5.1	0	1	0	Medium	1	Myosin light chain 3
MYLK4	Q86YV6	3	1	1	1	388	44.5	6.28	0	1	0	Medium	1	Myosin light chain kinase family member 4
MYO10	Q9HD67	4	5	6	5	2058	237.2	6.21	0	5	0	Medium	1	Unconventional myosin-X
MYO15	Q9UKN7	1	2	2	2	3530	395	9.17	0	2	0	Medium	1	Unconventional myosin-XV
MYO1F	O00160	2	2	3	1	1098	124.8	9.11	0	2	0	Medium	1	Unconventional myosin-If
MYO1G	B0I1T2	2	2	2	2	1018	116.4	8.73	0	2	0	Medium	1	Unconventional myosin-Id
MYO3A	Q8NEV4	1	2	2	2	1616	186.1	8.91	4.1	2	0	High	1	Myosin-IIIa
MYO5C	Q9NQX4	1	2	2	2	1742	202.7	7.71	1.85	2	0	Medium	1	Unconventional myosin-Vc
MYO9B	Q13459	1	3	3	2	2157	243.2	8.75	0	3	0	Medium	1	Unconventional myosin-IXb
MYOM1	P52179	0	1	1	1	1685	187.5	6.93	0	1	0	Medium	1	Myomesin-1
MYOME	Q5VU43	3	6	6	5	2346	264.9	5.47	0	6	0	Medium	1	Myomegalin
MYPT1	O14974	4	4	5	4	1030	115.2	5.4	11.28	4	0	High	1	Protein phosphatase 1 regulatory subunit 12A
NAA40	Q86UY6	5	1	1	1	237	27.2	7.39	0	1	0	Medium	1	N-alpha-acetyltransferase 40
NACA	Q13765	27	4	4	4	215	23.4	4.56	6.55	4	0	High	1	Nascent polypeptide-associated complex subunit alpha-2
NACC1	Q96RE7	7	3	3	3	527	57.2	5.74	1.82	3	0	Medium	1	Nucleus accumbens-associated protein 1
NADAP	Q9BWU0	1	1	1	1	796	88.8	5.19	0	1	0	Medium	1	Kanadaptin
NAKD2	Q4G0N4	11	4	4	4	442	49.4	8.18	5.03	4	0	High	1	\NAD kinase 2, mitochondrial\""
NAL14	Q86W24	2	2	3	2	1093	124.7	6.61	1.64	2	0	Medium	1	\NACHT, LRR and PYD domains-containing protein 14\""
NAMPT	P43490	12	7	7	6	491	55.5	7.15	3.59	7	0	Medium	1	Nicotinamide phosphoribosyltransferase
NAPEP	Q6IQ20	4	2	2	1	393	45.6	6.06	0	2	0	Medium	1	N-acyl-phosphatidylethanolamine-hydrolyzing phospholipase D
NAR5	Q96L15	4	1	2	1	291	32	8.27	0	1	0	Medium	1	Ecto-ADP-ribosyltransferase 5
NARR	P0DI83	5	1	1	1	198	21.1	12.16	0	1	0	Medium	1	Ras-related protein Rab-34
NASP	P49321	11	8	8	8	788	85.2	4.3	16.89	8	0	High	1	Nuclear autoantigenic sperm protein
NB5R2	Q6BCY4	9	2	2	2	276	31.4	8.5	3.71	2	0	Medium	1	NADH-cytochrome b5 reductase 3
NBAS	A2RRP1	1	3	3	2	2371	268.4	5.96	0	3	0	Medium	1	Neuroblastoma-amplified sequence
NCBP1	Q09161	8	6	6	6	790	91.8	6.43	5.93	6	0	High	1	Nuclear cap-binding protein subunit 1
NCK2	O43639	5	2	2	1	380	42.9	6.95	0	2	0	Medium	1	Cytoplasmic protein NCK2
NCK5L	Q9HCH0	4	4	5	4	1334	139.4	8.06	0	4	0	Medium	1	Nck-associated protein 5-like
NCKP5	O14513	1	2	2	2	1909	208.4	8.07	0	2	0	Medium	1	Nck-associated protein 5
NCLN	Q969V3	4	1	1	1	563	62.9	6.89	0	1	0	Medium	1	Nicalin
NCOR1	O75376	1	3	3	3	2440	270	7.11	0	3	0	Medium	1	Nuclear receptor corepressor 1
NCPR	P16435	17	11	14	11	677	76.6	5.58	26.71	11	0	High	1	NADPH--cytochrome P450 reductase
NDC1	Q9BTX1	3	2	2	1	674	76.3	9.09	4.38	2	0	High	1	Nucleoporin NDC1
NDE1	Q9NXR1	6	2	2	2	335	37.7	5.15	0	2	0	Medium	1	Nuclear distribution protein nudE homolog 1
NDKA	P15531	14	2	2	2	152	17.1	6.19	2.4	2	0	High	1	Nucleoside diphosphate kinase B
NDNF	Q8TB73	3	1	1	1	568	64.6	8.94	0	1	0	Medium	1	Protein NDNF
NDST1	P52848	2	1	2	1	882	100.8	7.97	0	1	0	Medium	1	Bifunctional heparan sulfate N-deacetylase/N-sulfotransferase 1
NDUAD	Q9P0J0	15	1	1	1	144	16.7	8.43	0	1	0	Medium	1	NADH dehydrogenase [ubiquinone] 1 alpha subcomplex subunit 13
NDUB8	O95169	8	2	2	2	186	21.8	6.8	0	2	0	Medium	1	\NADH dehydrogenase [ubiquinone] 1 beta subcomplex subunit 8, mitochondrial\""
NDUF8	A1L188	19	1	1	1	74	7.8	9.32	0	1	0	Medium	1	NADH dehydrogenase [ubiquinone] 1 alpha subcomplex assembly factor 8
NDUS2	O75306	6	3	3	3	463	52.5	7.55	1.8	3	0	Medium	1	\NADH dehydrogenase [ubiquinone] iron-sulfur protein 2, mitochondrial\""
NDUS3	O75489	5	1	2	1	264	30.2	7.5	1.71	1	0	Medium	1	\NADH dehydrogenase [ubiquinone] iron-sulfur protein 3, mitochondrial\""
NEB1	Q9ULJ8	2	2	2	2	1098	123.3	5.1	0	2	0	Medium	1	Neurabin-1
NEBL	O76041	2	1	1	1	1014	116.4	7.99	0	1	0	Medium	1	Nebulette
NECT2	Q92692	2	1	1	1	538	57.7	4.82	0	1	0	Medium	1	Nectin-2
NED4L	Q96PU5	1	1	2	1	975	111.9	5.82	0	1	0	Medium	1	E3 ubiquitin-protein ligase NEDD4-like
NEK1	Q96PY6	1	1	1	1	1258	142.7	5.94	2.01	1	0	Medium	1	Serine/threonine-protein kinase Nek1
NELFD	Q8IXH7	2	1	1	1	590	66.2	5.1	1.99	1	0	High	1	Negative elongation factor C/D
NEMF	O60524	2	2	2	2	1076	122.9	6.35	2.46	2	0	High	1	Nuclear export mediator factor NEMF
NEPRO	Q6NW34	2	1	1	1	567	64.5	9.74	2.22	1	0	Medium	1	Nucleolus and neural progenitor protein
NET4	Q9HB63	1	2	2	2	628	70	8.05	0	2	0	Medium	1	Netrin-4
NETO1	Q8TDF5	3	1	1	1	533	60.2	7.02	0	1	0	Medium	1	Neuropilin and tolloid-like protein 1
NEUL	Q9BYT8	6	5	5	5	704	80.6	6.64	6.32	5	0	High	1	\Neurolysin, mitochondrial\""
NEUR4	Q8WWR8	1	1	1	1	484	51.5	7.8	0	1	0	Medium	1	Sialidase-4
NEXMI	Q5QGS0	1	1	1	1	1516	167.4	6.4	0	1	0	Medium	1	Protein KIAA2022
NF1	P21359	3	5	6	5	2839	319.2	7.39	0	5	0	Medium	1	Neurofibromin
NFAM1	Q8NET5	5	1	1	1	270	29.7	8.81	0	1	0	Medium	1	NFAT activation molecule 1
NFH	P12036	2	2	2	2	1026	112.4	6.18	0	2	0	Medium	1	Neurofilament heavy polypeptide
NFIL3	Q16649	2	1	1	1	462	51.4	7.18	0	1	0	Medium	1	Nuclear factor interleukin-3-regulated protein
NFM	P07197	2	2	2	2	916	102.4	4.91	0	2	0	Medium	1	Neurofilament medium polypeptide
NFRKB	Q6P4R8	1	1	1	1	1299	138.9	9.25	0	1	0	Medium	1	Nuclear factor related to kappa-B-binding protein
NFU1	Q9UMS0	9	2	2	2	254	28.4	5.07	0	2	0	Medium	1	\NFU1 iron-sulfur cluster scaffold homolog, mitochondrial\""
NH2L1	P55769	9	1	1	1	128	14.2	8.46	2.49	1	0	High	1	NHP2-like protein 1
NHLC2	Q8NBF2	1	1	1	1	726	79.4	5.55	2.53	1	0	High	1	NHL repeat-containing protein 2
NHRF1	O14745	5	2	2	1	358	38.8	5.77	2.02	2	0	High	1	Na(+)/H(+) exchange regulatory cofactor NHE-RF1
NHRF2	Q15599	3	1	1	1	337	37.4	7.93	0	1	0	Medium	1	Na(+)/H(+) exchange regulatory cofactor NHE-RF2
NIBA1	Q9BZQ8	2	1	1	1	928	103.1	4.78	0	1	0	Medium	1	Protein Niban
NIBA2	Q96TA1	11	7	7	7	746	84.1	6.19	10.26	7	0	High	1	Niban-like protein 1
NIPS2	O75323	9	4	4	4	286	33.7	9.36	3.56	4	0	Medium	1	Protein NipSnap homolog 1
NIT1	Q86X76	2	1	1	1	327	35.9	7.74	0	1	0	Medium	1	Nitrilase homolog 1
NIT2	Q9NQR4	6	2	3	1	276	30.6	7.21	1.61	2	0	Medium	1	Omega-amidase NIT2
NKAP1	Q6ZUT1	5	2	2	2	292	34.1	9.73	0	2	0	Medium	1	Uncharacterized protein C11orf57
NKD1	Q969G9	1	1	2	1	470	52.3	8.62	0	1	0	Medium	1	Protein naked cuticle homolog 1
NLRC5	Q86WI3	0	1	1	1	1866	204.5	6.44	2.32	1	0	High	1	Protein NLRC5
NLRP1	Q9C000	1	1	1	1	1473	165.8	6.84	0	1	0	Medium	1	\NACHT, LRR and PYD domains-containing protein 1\""
NMD3	Q96D46	5	3	4	3	503	57.6	7.14	6.35	3	0	High	1	60S ribosomal export protein NMD3
NMT1	P30419	16	7	8	7	496	56.8	7.8	17.42	7	0	High	1	Glycylpeptide N-tetradecanoyltransferase 1
NMUR1	Q9HB89	5	1	1	1	426	47.3	8.7	0	1	0	Medium	1	Neuromedin-U receptor 1
NOL10	Q9BSC4	2	1	1	1	688	80.3	8.46	0	1	0	Medium	1	Nucleolar protein 10
NOL9	Q5SY16	3	2	6	1	702	79.3	9.13	1.61	2	0	Medium	1	Polynucleotide 5'-hydroxyl-kinase NOL9
NOLC1	Q14978	6	5	5	5	699	73.6	9.47	5.75	5	0	High	1	Nucleolar and coiled-body phosphoprotein 1
NOP14	P78316	2	2	2	1	857	97.6	7.58	0	2	0	Medium	1	Nucleolar protein 14
NOP9	Q86U38	6	4	4	3	636	69.4	7.28	5.33	4	0	High	1	Nucleolar protein 9
NOPC1	Q8N5I9	5	1	1	1	185	20.1	5.22	0	1	0	Medium	1	LINE-1 retrotransposable element ORF2 protein
NOTC3	Q9UM47	0	1	1	1	2321	243.5	5.39	0	1	0	Medium	1	Neurogenic locus notch homolog protein 3
NOTC4	Q99466	1	1	1	1	2003	209.5	5.73	0	1	0	Medium	1	Neurogenic locus notch homolog protein 4
NOTUM	Q6P988	2	1	1	1	496	55.7	7.55	0	1	0	Medium	1	Palmitoleoyl-protein carboxylesterase NOTUM
NP1L1	P55209	15	5	8	4	391	45.3	4.46	15.36	5	0	High	1	Nucleosome assembly protein 1-like 1
NP1L4	Q99733	12	4	5	3	375	42.8	4.69	12.13	4	0	High	1	Nucleosome assembly protein 1-like 4
NPA1P	O60287	0	1	2	1	2271	254.2	6.47	0	1	0	Medium	1	Nucleolar pre-ribosomal-associated protein 1
NPAS2	Q99743	2	2	2	2	824	91.7	6.81	0	2	0	Medium	1	Circadian locomoter output cycles protein kaput
NPL4	Q8TAT6	1	1	1	1	608	68.1	6.38	0	1	0	Medium	1	Nuclear protein localization protein 4 homolog
NPM3	O75607	10	1	1	1	178	19.3	4.63	4.19	1	0	High	1	Nucleoplasmin-3
NPTN	Q9Y639	6	2	2	2	398	44.4	7.99	1.61	2	0	Medium	1	Neuroplastin
NPTX1	Q15818	3	1	1	1	432	47.1	6.55	0	1	0	Medium	1	Neuronal pentraxin-1
NPW	Q8N729	5	1	1	1	165	18	11.62	0	1	0	Medium	1	Neuropeptide W
NR1D1	P20393	2	1	1	1	614	66.8	8.5	0	1	0	Medium	1	Nuclear receptor subfamily 1 group D member 1
NR1H3	Q13133	3	2	2	2	447	50.4	7.66	0	2	0	Medium	1	Oxysterols receptor LXR-alpha
NRAP	Q86VF7	2	2	2	2	1730	197	9.2	0	2	0	Medium	1	Nebulin-related-anchoring protein
NRDC	O43847	1	1	2	1	1151	131.6	4.98	0	1	0	Medium	1	Nardilysin
NRG1	Q02297	1	1	1	1	640	70.3	8.79	0	1	0	Medium	1	\Pro-neuregulin-1, membrane-bound isoform\""
NRX2A	Q9P2S2	2	3	3	2	1712	184.9	5.92	1.76	3	0	Medium	1	Neurexin-2
NRX3A	Q9Y4C0	1	2	2	1	1643	180.5	5.54	1.76	2	0	Medium	1	Neurexin-3
NSD1	Q96L73	1	3	3	2	2696	296.5	8.03	0	3	0	Medium	1	\Histone-lysine N-methyltransferase, H3 lysine-36 and H4 lysine-20 specific\""
NSD2	O96028	1	2	9	1	1365	152.2	8.69	0	2	0	Medium	1	Histone-lysine N-methyltransferase NSD2
NSE1	Q8WV22	7	1	1	1	266	30.8	7.47	0	1	0	Medium	1	Non-structural maintenance of chromosomes element 1 homolog
NSE4A	Q9NXX6	2	1	1	1	385	44.3	5.38	1.74	1	0	Medium	1	Non-structural maintenance of chromosomes element 4 homolog A
NSF	P46459	8	6	6	6	744	82.5	6.95	7.23	6	0	High	1	Vesicle-fusing ATPase
NSGX	Q9UH64	13	1	1	1	79	8.8	11.58	0	1	0	Medium	1	Susceptibility protein NSG-x
NSMA3	Q9NXE4	5	5	5	4	866	97.7	8.27	2.45	5	0	High	1	Sphingomyelin phosphodiesterase 4
NSUN7	Q8NE18	1	1	1	1	718	81	8.75	0	1	0	Medium	1	Putative methyltransferase NSUN7
NT5D2	Q9H857	2	1	1	1	520	60.7	6.77	0	1	0	Medium	1	5'-nucleotidase domain-containing protein 2
NTAS1	Q6ZSK4	6	1	1	1	140	15.2	9.48	0	1	0	Medium	1	Putative uncharacterized protein NTM-AS1
NTF4	P34130	11	1	1	1	210	22.4	8.62	0	1	0	Medium	1	Neurotrophin-4
NU188	Q5SRE5	0	1	1	1	1749	195.9	6.73	1.65	1	0	Medium	1	Nucleoporin NUP188 homolog
NU214	P35658	1	2	2	2	2090	213.5	7.47	1.74	2	0	Medium	1	Nuclear pore complex protein Nup214
NUB1	Q9Y5A7	6	3	3	3	615	70.5	5.96	1.71	3	0	Medium	1	NEDD8 ultimate buster 1
NUBP2	Q9Y5Y2	5	1	1	1	271	28.8	5.83	0	1	0	Medium	1	Cytosolic Fe-S cluster assembly factor NUBP1
NUCB1	Q02818	2	1	1	1	461	53.8	5.25	1.86	1	0	Medium	1	Nucleobindin-1
NUCB2	P80303	2	1	1	1	420	50.2	5.12	0	1	0	Medium	1	Nucleobindin-1
NUCKS	Q9H1E3	3	1	1	1	243	27.3	5.08	0	1	0	Medium	1	Nuclear ubiquitous casein and cyclin-dependent kinase substrate 1
NUFP2	Q7Z417	4	2	2	2	695	76.1	8.7	0	2	0	Medium	1	Nuclear fragile X mental retardation-interacting protein 2
NUMB	P49757	2	1	1	1	651	70.8	8.51	0	1	0	Medium	1	Protein numb homolog
NUP50	Q9UKX7	13	5	6	5	468	50.1	7.06	14.01	5	0	High	1	Nuclear pore complex protein Nup50
NUP54	Q7Z3B4	5	2	2	2	507	55.4	7.02	4.36	2	0	High	1	Nucleoporin p54
NUP62	P37198	7	2	2	2	522	53.2	5.31	6.02	2	0	High	1	Nuclear pore glycoprotein p62
NUP85	Q9BW27	2	1	1	1	656	75	5.55	2.44	1	0	High	1	Nuclear pore complex protein Nup85
NUP88	Q99567	8	4	4	4	741	83.5	5.69	4.78	4	0	High	1	Nuclear pore complex protein Nup88
NUP98	P52948	4	6	6	6	1817	197.5	6.4	9.69	6	0	High	1	Nuclear pore complex protein Nup98-Nup96
NYNRI	Q9P2P1	1	1	1	1	1898	208.2	8.02	0	1	0	Medium	1	Protein NYNRIN
O10J1	P30954	3	1	1	1	320	35.9	9.07	0	1	0	Medium	1	Olfactory receptor 10J1
O11A1	Q9GZK7	3	1	1	1	315	35.2	7.87	0	1	0	Medium	1	Olfactory receptor 11A1
O13D1	Q8NGV5	3	1	1	1	346	39.1	7.59	0	1	0	Medium	1	Olfactory receptor 13D1
OAS1	P00973	2	1	1	1	400	46	8.22	0	1	0	Medium	1	2'-5'-oligoadenylate synthase 1
OASL	Q15646	2	1	1	1	514	59.2	7.87	0	1	0	Medium	1	2'-5'-oligoadenylate synthase-like protein
OBI1	Q5W0B1	3	2	2	2	726	81.1	5.72	0	2	0	Medium	1	RING finger protein 219
OBP2B	Q9NPH6	12	1	1	1	170	19.4	8.76	0	1	0	Medium	1	Odorant-binding protein 2b
OBSCN	Q5VST9	1	4	5	4	7968	867.9	5.99	0	4	0	Medium	1	Obscurin
ODB2	P11182	2	1	1	1	482	53.5	8.51	0	1	0	Medium	1	\Lipoamide acyltransferase component of branched-chain alpha-keto acid dehydrogenase complex, mitochondrial\""
ODFP2	Q5BJF6	2	1	1	1	829	95.3	7.62	2.19	1	0	Medium	1	Outer dense fiber protein 2
ODO2	P36957	11	5	5	5	453	48.7	8.95	9.65	5	0	High	1	\Dihydrolipoyllysine-residue succinyltransferase component of 2-oxoglutarate dehydrogenase complex, mitochondrial\""
ODP2	P10515	10	6	7	6	647	69	7.84	12.02	6	0	High	1	\Dihydrolipoyllysine-residue acetyltransferase component of pyruvate dehydrogenase complex, mitochondrial\""
ODPA	P08559	16	6	9	6	390	43.3	8.06	9.82	6	0	High	1	\Pyruvate dehydrogenase E1 component subunit alpha, somatic form, mitochondrial\""
ODPX	O00330	5	3	4	2	501	54.1	8.66	0	3	0	Medium	1	\Pyruvate dehydrogenase protein X component, mitochondrial\""
ODR4	Q5SWX8	9	4	4	4	454	51.1	5.92	2.21	4	0	High	1	Protein odr-4 homolog
OGA	O60502	1	1	1	1	916	102.8	4.91	2.6	1	0	High	1	Protein O-GlcNAcase
OGFD1	Q8N543	1	1	1	1	542	63.2	5.11	1.65	1	0	Medium	1	Prolyl 3-hydroxylase OGFOD1
OGRL1	Q5TC84	4	1	1	1	451	51.2	6.13	0	1	0	Medium	1	Opioid growth factor receptor-like protein 1
OLA1	Q9NTK5	2	1	1	1	396	44.7	7.81	0	1	0	Medium	1	Obg-like ATPase 1
OLFM4	Q6UX06	4	1	1	1	510	57.2	5.69	0	1	0	Medium	1	Olfactomedin-4
OPA1	O60313	4	5	5	4	960	111.6	7.87	7.96	5	0	High	1	\Dynamin-like 120 kDa protein, mitochondrial\""
OPLA	O14841	1	1	1	1	1288	137.4	6.58	0	1	0	Medium	1	5-oxoprolinase
OPN3	Q9H1Y3	3	1	1	1	402	44.8	9.14	0	1	0	Medium	1	Opsin-3
OR2A1	Q8NGT9	3	1	1	1	310	34.7	8.54	0	1	0	Medium	1	Olfactory receptor 2A1/2A42
OR2I1	Q8NGU4	4	1	2	1	316	34.1	9.44	0	1	0	Medium	1	Putative olfactory receptor 2I1
OR3A2	P47893	3	1	1	1	321	35.2	7.62	0	1	0	Medium	1	Olfactory receptor 3A2
OR5K4	A6NMS3	4	1	1	1	321	36.7	8.1	0	1	0	Medium	1	Olfactory receptor 5K4
OR6J1	Q8NGC5	2	1	2	1	347	38.7	8.47	0	1	0	Medium	1	Olfactory receptor 6J1
OR6P1	Q8NGX9	3	1	1	1	317	35.8	8.44	0	1	0	Medium	1	Olfactory receptor 6P1
OR7D2	Q96RA2	3	1	1	1	312	34.7	7.05	0	1	0	Medium	1	Olfactory receptor 7D2
ORC1	Q13415	1	2	2	1	861	97.3	9.22	3.4	2	0	Medium	1	Origin recognition complex subunit 1
ORNT2	Q9BXI2	2	1	1	1	301	32.6	9.09	0	1	0	Medium	1	Mitochondrial ornithine transporter 2
OS9	Q13438	1	1	4	1	667	75.5	4.87	0	1	0	Medium	1	Protein OS-9
OSB11	Q9BXB4	1	1	1	1	747	83.6	7.06	0	1	0	Medium	1	Oxysterol-binding protein-related protein 11
OSBL2	Q9H1P3	4	1	3	1	480	55.2	6.35	0	1	0	Medium	1	Oxysterol-binding protein-related protein 1
OSBL3	Q9H4L5	2	1	1	1	887	101.2	6.87	1.95	1	0	High	1	Oxysterol-binding protein-related protein 3
OSBL6	Q9BZF3	1	1	1	1	934	106.2	6.93	0	1	0	Medium	1	Oxysterol-binding protein-related protein 6
OSBL8	Q9BZF1	2	1	1	1	889	101.1	6.96	0	1	0	Medium	1	Oxysterol-binding protein-related protein 8
OSBL9	Q96SU4	2	1	1	1	736	83.1	6.18	0	1	0	Medium	1	Oxysterol-binding protein-related protein 9
OSBP1	P22059	7	5	5	5	807	89.4	7.3	0	5	0	Medium	1	Oxysterol-binding protein 1
OST48	P39656	8	3	3	3	456	50.8	6.55	5.56	3	0	High	1	Dolichyl-diphosphooligosaccharide--protein glycosyltransferase 48 kDa subunit
OTP	Q5XKR4	3	1	1	1	325	34.1	9.47	0	1	0	Medium	1	Homeobox protein orthopedia
OTUD5	Q96G74	2	1	1	1	571	60.6	6.54	0	1	0	Medium	1	OTU domain-containing protein 5
OXLD1	Q5BKU9	7	1	1	1	147	15.8	8.22	0	1	0	Medium	1	Oxidoreductase-like domain-containing protein 1
OXND1	Q96HP4	5	1	1	1	312	34.8	8.37	0	1	0	Medium	1	Oxidoreductase NAD-binding domain-containing protein 1
OXR1	Q8N573	3	2	2	2	874	97.9	5.47	0	2	0	Medium	1	Oxidation resistance protein 1
OXSR1	O95747	9	4	4	4	527	58	6.43	5.96	4	0	High	1	Serine/threonine-protein kinase OSR1
OZF	Q15072	7	1	1	1	292	33.3	8.88	0	1	0	Medium	1	Zinc finger protein OZF
P121C	A8CG34	1	1	1	1	1229	125	10.37	0	1	0	Medium	1	Nuclear envelope pore membrane protein POM 121C
P20L1	A8MW92	2	2	2	2	1017	114.9	6.83	0	2	0	Medium	1	PHD finger protein 20
P210L	Q5VU65	1	4	4	4	1888	210.5	7.5	1.84	4	0	Medium	1	Nuclear pore membrane glycoprotein 210-like
P3C2B	O00750	2	3	4	3	1634	184.7	7.3	2.04	3	0	Medium	1	Phosphatidylinositol 4-phosphate 3-kinase C2 domain-containing subunit beta
P3C2G	O75747	1	1	1	1	1445	165.6	6.93	0	1	0	Medium	1	Phosphatidylinositol 4-phosphate 3-kinase C2 domain-containing subunit gamma
P4HA1	P13674	4	2	2	1	534	61	6.01	3.06	2	0	High	1	Prolyl 4-hydroxylase subunit alpha-1
P4HA3	Q7Z4N8	1	1	1	1	544	61.1	6.49	0	1	0	Medium	1	Prolyl 4-hydroxylase subunit alpha-3
P4R3A	Q6IN85	1	1	1	1	833	95.3	4.94	0	1	0	Medium	1	Serine/threonine-protein phosphatase 4 regulatory subunit 3A
P5CR1	P32322	17	4	4	4	319	33.3	7.61	7.05	4	0	High	1	\Pyrroline-5-carboxylate reductase 1, mitochondrial\""
P66A	Q86YP4	2	1	1	1	633	68	9.94	2.62	1	0	High	1	Transcriptional repressor p66-alpha
PA24B	P0C869	4	2	2	2	781	87.9	5.96	4.17	2	0	Medium	1	Cytosolic phospholipase A2 beta
PACN2	Q9UNF0	4	2	2	2	486	55.7	5.2	4.68	2	0	High	1	Protein kinase C and casein kinase substrate in neurons protein 2
PACS1	Q6VY07	1	1	1	1	963	104.8	7.74	0	1	0	Medium	1	Phosphofurin acidic cluster sorting protein 1
PAFA	Q13093	4	2	2	2	441	50	7.56	0	2	0	Medium	1	Platelet-activating factor acetylhydrolase
PAIP1	Q9H074	3	1	1	1	479	53.5	4.81	2.05	1	0	High	1	Polyadenylate-binding protein-interacting protein 1
PAK2	Q13177	4	2	2	2	524	58	5.96	2.46	2	0	High	1	Serine/threonine-protein kinase PAK 2
PAK4	O96013	1	1	1	1	591	64	9.73	0	1	0	Medium	1	Serine/threonine-protein kinase PAK 4
PALLD	Q8WX93	2	2	2	2	1383	150.5	7.09	4.08	2	0	High	1	Palladin
PALM	O75781	5	2	2	2	387	42.1	5	4.37	2	0	High	1	Paralemmin-1
PANX2	Q96RD6	1	1	1	1	677	74.4	8.02	1.84	1	0	Medium	1	Pannexin-2
PAPS1	O43252	5	2	2	2	624	70.8	6.86	2.66	2	0	High	1	Bifunctional 3'-phosphoadenosine 5'-phosphosulfate synthase 1
PAQR2	Q86V24	3	1	2	1	386	43.9	6.6	0	1	0	Medium	1	Adiponectin receptor protein 2
PAR6G	Q9BYG4	2	1	1	1	376	40.9	8.22	1.62	1	0	Medium	1	Partitioning defective 6 homolog gamma
PARN	O95453	5	3	3	3	639	73.4	6.2	1.81	3	0	Medium	1	Poly(A)-specific ribonuclease PARN
PARP8	Q8N3A8	1	1	1	1	854	95.8	8.28	0	1	0	Medium	1	Poly [ADP-ribose] polymerase 8
PARP9	Q8IXQ6	2	2	2	2	854	96.3	7.91	0	2	0	Medium	1	Poly [ADP-ribose] polymerase 9
PATZ1	Q9HBE1	3	1	1	1	687	74	8.35	0	1	0	Medium	1	\POZ-, AT hook-, and zinc finger-containing protein 1\""
PAXB1	Q9Y5B6	1	1	1	1	917	104.7	5.68	0	1	0	Medium	1	PAX3- and PAX7-binding protein 1
PBIP1	Q96AQ6	2	1	1	1	731	80.6	5.33	0	1	0	Medium	1	Pre-B-cell leukemia transcription factor-interacting protein 1
PBX1	P40424	11	2	2	2	430	46.6	7.03	0	2	0	Medium	1	Pre-B-cell leukemia transcription factor 3
PCBP3	P57721	15	4	5	1	371	39.4	8.07	9.92	4	0	High	1	Poly(rC)-binding protein 3
PCD12	Q9NPG4	0	1	1	1	1184	128.9	5.29	0	1	0	Medium	1	Protocadherin-12
PCD19	Q8TAB3	2	1	1	1	1148	126.2	5.36	0	1	0	Medium	1	Protocadherin-19
PCD23	Q6V1P9	0	1	1	1	3371	370	4.77	0	1	0	Medium	1	Protocadherin-23
PCDA3	Q9Y5H8	1	1	1	1	950	102.4	5.08	0	1	0	Medium	1	Protocadherin alpha-3
PCDA5	Q9Y5H7	1	1	1	1	936	102	5.43	0	1	0	Medium	1	Protocadherin alpha-5
PCDBG	Q9NRJ7	1	1	1	1	776	84.9	5.15	0	1	0	Medium	1	Protocadherin beta-16
PCDH8	O95206	1	2	3	2	1070	112.9	5.54	0	2	0	Medium	1	Protocadherin-8
PCDH9	Q9HC56	1	1	1	1	1237	136	5.47	0	1	0	Medium	1	Protocadherin-9
PCF11	O94913	0	1	1	1	1555	172.9	8.48	1.84	1	0	Medium	1	Pre-mRNA cleavage complex 2 protein Pcf11
PCKGM	Q16822	21	12	12	12	640	70.7	7.62	24.67	12	0	High	1	\Phosphoenolpyruvate carboxykinase [GTP], mitochondrial\""
PCLO	Q9Y6V0	1	6	6	5	5142	560.4	6.47	0	6	0	Medium	1	Protein piccolo
PCM1	Q15154	0	1	1	1	2024	228.4	5.02	0	1	0	Medium	1	Pericentriolar material 1 protein
PCSK4	Q6UW60	2	1	2	1	755	82.7	8.31	0	1	0	Medium	1	Furin
PCX3	Q9H6A9	1	2	2	2	2034	221.9	6.64	0	2	0	Medium	1	Pecanex-like protein 3
PCX4	Q63HM2	2	2	2	2	1172	132.6	6.29	0	2	0	Medium	1	Pecanex-like protein 4
PCYOX	Q9UHG3	8	4	5	4	505	56.6	6.18	8.57	4	0	High	1	Prenylcysteine oxidase 1
PDCD4	Q53EL6	7	3	3	3	469	51.7	5.21	2.26	3	0	High	1	Programmed cell death protein 4
PDCD5	O14737	10	1	1	1	125	14.3	6.04	2.14	1	0	High	1	Programmed cell death protein 5
PDCD6	O75340	3	1	1	1	191	21.9	5.4	0	1	0	Medium	1	\Succinate dehydrogenase [ubiquinone] flavoprotein subunit, mitochondrial\""
PDCL3	Q9H2J4	4	1	1	1	239	27.6	4.84	1.69	1	0	Medium	1	Phosducin-like protein 3
PDE12	Q6L8Q7	13	5	5	5	609	67.3	6.57	10.36	5	0	High	1	\2',5'-phosphodiesterase 12\""
PDE1B	Q01064	4	1	1	1	536	61.3	5.52	0	1	0	Medium	1	\Calcium/calmodulin-dependent 3',5'-cyclic nucleotide phosphodiesterase 1C\""
PDE4A	P27815	2	1	1	1	886	98.1	5.21	0	1	0	Medium	1	\cAMP-specific 3',5'-cyclic phosphodiesterase 4A\""
PDE8B	O95263	1	1	1	1	885	98.9	6.83	0	1	0	Medium	1	\High affinity cAMP-specific and IBMX-insensitive 3',5'-cyclic phosphodiesterase 8B\""
PDE9A	O76083	2	1	1	1	593	68.4	6.19	0	1	0	Medium	1	\High affinity cGMP-specific 3',5'-cyclic phosphodiesterase 9A\""
PDGFB	P01127	4	1	1	1	241	27.3	9.16	0	1	0	Medium	1	Platelet-derived growth factor subunit B
PDGFD	Q9GZP0	5	1	1	1	370	42.8	7.97	0	1	0	Medium	1	Platelet-derived growth factor D
PDIP2	Q9Y2S7	10	3	3	3	368	42	8.63	2.71	3	0	High	1	Polymerase delta-interacting protein 2
PDK2	Q15119	2	1	1	1	407	46.1	6.61	0	1	0	Medium	1	\[Pyruvate dehydrogenase (acetyl-transferring)] kinase isozyme 2, mitochondrial\""
PDLI7	Q9NR12	3	1	1	1	457	49.8	8.41	0	1	0	Medium	1	PDZ and LIM domain protein 7
PDRG1	Q9NUG6	8	1	1	1	133	15.5	6.06	0	1	0	Medium	1	p53 and DNA damage-regulated protein 1
PDS5A	Q29RF7	1	2	2	1	1337	150.7	7.91	0	2	0	Medium	1	Sister chromatid cohesion protein PDS5 homolog A
PDS5B	Q9NTI5	2	3	3	2	1447	164.6	8.47	0	3	0	Medium	1	Sister chromatid cohesion protein PDS5 homolog B
PDXD1	Q6P996	1	1	1	1	788	86.7	5.38	1.61	1	0	Medium	1	Pyridoxal-dependent decarboxylase domain-containing protein 1
PDZD2	O15018	1	2	2	2	2839	301.5	7.43	0	2	0	Medium	1	PDZ domain-containing protein 2
PELP1	Q8IZL8	5	4	4	4	1130	119.6	4.34	6.71	4	0	High	1	\Proline-, glutamic acid- and leucine-rich protein 1\""
PER3	P56645	2	2	2	2	1201	131.8	6.89	0	2	0	Medium	1	Period circadian protein homolog 3
PESC	O00541	2	1	1	1	588	68	7.33	0	1	0	Medium	1	Pescadillo homolog
PEX14	O75381	10	5	5	4	377	41.2	4.94	5.15	5	0	Medium	1	Peroxisomal membrane protein PEX14
PEX5	P50542	1	1	1	1	639	70.8	4.54	0	1	0	Medium	1	Peroxisomal targeting signal 1 receptor
PFD2	Q9UHV9	8	1	1	1	154	16.6	6.58	0	1	0	Medium	1	Prefoldin subunit 2
PFD6	O15212	6	1	1	1	129	14.6	8.88	0	1	0	Medium	1	Prefoldin subunit 6
PFKAL	P17858	9	6	7	2	780	85	7.5	10.51	6	0	High	1	\ATP-dependent 6-phosphofructokinase, platelet type\""
PGAM5	Q96HS1	8	3	3	3	289	32	8.68	1.86	3	0	Medium	1	\Serine/threonine-protein phosphatase PGAM5, mitochondrial\""
PGDH	P15428	14	3	3	3	266	29	5.86	2.42	3	0	High	1	15-hydroxyprostaglandin dehydrogenase [NAD(+)]
PGFRA	P16234	3	2	3	2	1089	122.6	5.17	0	2	0	Medium	1	Platelet-derived growth factor receptor alpha
PGH1	P23219	1	1	1	1	599	68.6	7.23	0	1	0	Medium	1	Prostaglandin G/H synthase 1
PGLT1	Q8NBL1	2	1	1	1	392	46.2	8.72	0	1	0	Medium	1	Protein O-glucosyltransferase 1
PGRC1	O00264	5	1	1	1	195	21.7	4.7	1.71	1	0	Medium	1	Membrane-associated progesterone receptor component 1
PGTA	Q92696	3	2	2	2	567	65	5.67	1.94	2	0	High	1	Geranylgeranyl transferase type-2 subunit alpha
PHAR2	O75167	2	2	2	1	634	69.7	8.16	1.69	2	0	Medium	1	Phosphatase and actin regulator 2
PHAR4	Q8IZ21	1	1	1	1	702	78.2	6.62	0	1	0	Medium	1	Phosphatase and actin regulator 4
PHC3	Q8NDX5	1	1	1	1	983	106.1	6.62	0	1	0	Medium	1	Polyhomeotic-like protein 3
PHF14	O94880	3	2	3	2	948	106.9	5.34	0	2	0	Medium	1	PHD finger protein 14
PHF8	Q9UPP1	1	1	1	1	1060	117.8	8.72	0	1	0	Medium	1	Histone lysine demethylase PHF8
PHIP	Q8WWQ0	1	3	3	1	1821	206.6	8.85	0	3	0	Medium	1	PH-interacting protein
PHLA1	Q8WV24	2	1	1	1	401	45	9.89	0	1	0	Medium	1	Pleckstrin homology-like domain family A member 1
PHLB3	Q6NSJ2	1	1	1	1	640	71.9	6.57	0	1	0	Medium	1	Pleckstrin homology-like domain family B member 3
PHLP2	Q6ZVD8	1	1	1	1	1323	146.7	5.71	1.7	1	0	Medium	1	PH domain leucine-rich repeat-containing protein phosphatase 2
PHOP1	Q8TCT1	4	1	1	1	267	29.7	7.71	0	1	0	Medium	1	Phosphoethanolamine/phosphocholine phosphatase
PHOP2	Q8TCD6	3	1	2	1	241	27.8	6.79	0	1	0	Medium	1	Pyridoxal phosphate phosphatase PHOSPHO2
PHRF1	Q9P1Y6	1	2	2	2	1649	178.6	8.95	0	2	0	Medium	1	PHD and RING finger domain-containing protein 1
PI3R5	Q8WYR1	2	2	2	2	880	97.3	6.74	0	2	0	Medium	1	Phosphoinositide 3-kinase regulatory subunit 5
PI51A	Q99755	4	1	1	1	562	62.6	8.21	0	1	0	Medium	1	Phosphatidylinositol 4-phosphate 5-kinase type-1 alpha
PI51B	O14986	2	1	1	1	540	61	6.86	0	1	0	Medium	1	Phosphatidylinositol 4-phosphate 5-kinase type-1 beta
PIEZ2	Q9H5I5	1	2	2	2	2752	317.9	6.15	0	2	0	Medium	1	Piezo-type mechanosensitive ion channel component 2
PIGT	Q969N2	4	2	2	2	578	65.7	8.38	0	2	0	Medium	1	GPI transamidase component PIG-T
PIWL4	Q7Z3Z4	2	2	2	2	852	96.5	8.88	0	2	0	Medium	1	Piwi-like protein 4
PK2L2	Q9NZM6	2	2	2	1	624	73.7	8.88	0	2	0	Medium	1	Polycystic kidney disease 2-like 2 protein
PK3CD	O00329	4	3	4	3	1044	119.4	7.18	0	3	0	Medium	1	\Phosphatidylinositol 4,5-bisphosphate 3-kinase catalytic subunit delta isoform\""
PKD1	P98161	1	2	2	2	4303	462.2	6.73	2	2	0	High	1	Polycystin-1
PKH4B	Q96PX9	0	1	1	1	1271	139.6	6.79	0	1	0	Medium	1	Pleckstrin homology domain-containing family G member 4B
PKHA6	Q9Y2H5	1	1	1	1	1048	117.1	9.1	0	1	0	Medium	1	Pleckstrin homology domain-containing family A member 6
PKHD1	P08F94	0	1	1	1	4074	446.4	6.57	0	1	0	Medium	1	Fibrocystin
PKP4	Q99569	2	2	2	2	1192	131.8	8.94	0	2	0	Medium	1	Plakophilin-4
PLAL2	Q9UPG8	2	1	1	1	496	54.5	8.65	0	1	0	Medium	1	Zinc finger protein PLAGL2
PLAP	Q9Y263	8	5	6	5	795	87.1	6.37	11.89	5	0	High	1	Phospholipase A-2-activating protein
PLCB3	Q01970	2	1	1	1	1234	138.7	5.9	0	1	0	Medium	1	\1-phosphatidylinositol 4,5-bisphosphate phosphodiesterase beta-3\""
PLCC	Q9NRZ7	3	1	1	1	376	43.4	8.72	0	1	0	Medium	1	1-acyl-sn-glycerol-3-phosphate acyltransferase gamma
PLCD3	Q8N3E9	1	1	1	1	789	89.2	6.98	0	1	0	Medium	1	\1-phosphatidylinositol 4,5-bisphosphate phosphodiesterase delta-3\""
PLCG1	P19174	4	2	2	2	1290	148.4	6.05	0	2	0	Medium	1	\1-phosphatidylinositol 4,5-bisphosphate phosphodiesterase gamma-1\""
PLCH1	Q4KWH8	1	2	3	1	1693	189.1	7.74	1.63	2	0	Medium	1	\1-phosphatidylinositol 4,5-bisphosphate phosphodiesterase eta-1\""
PLCH2	O75038	2	2	2	2	1416	154.6	7.84	0	2	0	Medium	1	\1-phosphatidylinositol 4,5-bisphosphate phosphodiesterase eta-1\""
PLD1	Q13393	1	1	1	1	1074	124.1	8.78	0	1	0	Medium	1	Phospholipase D1
PLGT2	Q6UW63	4	3	4	2	502	58	7.71	0	3	0	Medium	1	KDEL motif-containing protein 1
PLOD3	O60568	3	2	2	2	738	84.7	6.05	3.61	2	0	Medium	1	\Procollagen-lysine,2-oxoglutarate 5-dioxygenase 3\""
PLPL4	P41247	6	1	2	1	253	28	9.11	0	1	0	Medium	1	Patatin-like phospholipase domain-containing protein 4
PLPR5	Q32ZL2	7	1	1	1	321	35.4	7.02	0	1	0	Medium	1	Phospholipid phosphatase-related protein type 5
PLSI	Q14651	18	9	10	9	629	70.2	5.41	22.47	9	0	High	1	Plastin-1
PLSL	P13796	2	1	1	1	627	70.2	5.43	0	1	0	Medium	1	Plastin-2
PLTP	P55058	2	1	1	1	493	54.7	7.01	0	1	0	Medium	1	Phospholipid transfer protein
PLVAP	Q9BX97	4	2	2	2	442	50.6	8.79	0	2	0	Medium	1	Plasmalemma vesicle-associated protein
PLXD1	Q9Y4D7	1	2	2	2	1925	211.9	7.15	0	2	0	Medium	1	Plexin-D1
PM2PB	Q13670	4	1	1	1	270	28.5	6.7	0	1	0	Medium	1	Probable E3 ubiquitin-protein ligase DTX2
PMFBP	Q8TBY8	2	2	2	2	1007	117.4	6.29	0	2	0	Medium	1	Polyamine-modulated factor 1-binding protein 1
PMGT1	Q8WZA1	2	1	1	1	660	75.2	6.83	0	1	0	Medium	1	\Protein O-linked-mannose beta-1,2-N-acetylglucosaminyltransferase 1\""
PMM2	O15305	12	3	3	3	246	28.1	6.77	7.53	3	0	High	1	Phosphomannomutase 2
PNISR	Q8TF01	1	1	1	1	805	92.5	10.02	0	1	0	Medium	1	Arginine/serine-rich protein PNISR
PODO	Q9NP85	4	1	1	1	383	42.2	8.75	0	1	0	Medium	1	Podocin
PODXL	O00592	2	1	1	1	558	58.6	5.49	0	1	0	Medium	1	Podocalyxin
PON2	Q15165	5	1	1	1	354	39.4	5.6	0	1	0	Medium	1	Serum paraoxonase/arylesterase 2
PORIM	Q8N131	4	1	1	1	208	21.5	8.7	0	1	0	Medium	1	Porimin
PP14A	Q96A00	7	1	2	1	147	16.7	9.38	0	1	0	Medium	1	Protein phosphatase 1 regulatory subunit 14A
PP1B	P62140	18	6	7	5	327	37.2	6.19	15.45	6	0	High	1	Serine/threonine-protein phosphatase PP1-beta catalytic subunit
PP1R7	Q15435	3	1	1	1	360	41.5	4.91	0	1	0	Medium	1	Protein phosphatase 1 regulatory subunit 7
PP1RA	Q96QC0	3	3	4	3	940	99	9.17	0	3	0	Medium	1	Serine/threonine-protein phosphatase 1 regulatory subunit 10
PP2AB	P62714	5	1	1	1	309	35.6	5.43	0	1	0	Medium	1	Serine/threonine-protein phosphatase 2A catalytic subunit beta isoform
PP2BA	Q08209	13	7	7	7	521	58.7	5.86	15.88	7	0	High	1	Serine/threonine-protein phosphatase 2B catalytic subunit alpha isoform
PP4P2	Q8N4L2	10	1	1	1	257	28.1	8.68	0	1	0	Medium	1	\Type 2 phosphatidylinositol 4,5-bisphosphate 4-phosphatase\""
PP4R2	Q9NY27	2	1	1	1	417	46.9	4.54	2.03	1	0	High	1	Serine/threonine-protein phosphatase 4 regulatory subunit 2
PPAC	P24666	8	1	1	1	158	18	6.74	2.59	1	0	High	1	Low molecular weight phosphotyrosine protein phosphatase
PPB1	P05187	40	17	20	4	535	57.9	6.29	43.93	17	0	High	1	\Alkaline phosphatase, placental type\""
PPBN	P10696	36	16	21	3	532	57.3	6.34	51.5	16	0	High	1	\Alkaline phosphatase, placental-like\""
PPCE	P48147	10	7	7	7	710	80.6	5.86	6.95	7	0	High	1	Prolyl endopeptidase
PPCS	Q9HAB8	2	1	1	1	311	34	6.71	0	1	0	Medium	1	Phosphopantothenate--cysteine ligase
PPIC	P45877	9	2	2	1	212	22.7	8.4	2.43	2	0	Medium	1	Peptidyl-prolyl cis-trans isomerase C
PPID	Q08752	6	3	3	2	370	40.7	7.21	4.01	3	0	High	1	Peptidyl-prolyl cis-trans isomerase D
PPIL4	Q8WUA2	3	2	2	2	492	57.2	5.92	2.08	2	0	High	1	Peptidyl-prolyl cis-trans isomerase-like 4
PPM1D	O15297	3	2	2	2	605	66.6	8.94	0	2	0	Medium	1	Protein phosphatase 1D
PPM1F	P49593	3	1	1	1	454	49.8	5.1	0	1	0	Medium	1	Protein phosphatase 1F
PPM1G	O15355	7	3	3	3	546	59.2	4.36	6.85	3	0	High	1	Protein phosphatase 1G
PPP5	P53041	5	2	2	2	499	56.8	6.28	5.44	2	0	High	1	Serine/threonine-protein phosphatase 5
PPR18	Q6NYC8	2	1	1	1	613	67.9	5.4	0	1	0	Medium	1	Phostensin
PPR29	Q5R3F8	3	2	2	2	820	89.6	7.62	0	2	0	Medium	1	Protein phosphatase 1 regulatory subunit 29
PPWD1	Q96BP3	1	1	1	1	646	73.5	7.15	1.67	1	0	Medium	1	Peptidylprolyl isomerase domain and WD repeat-containing protein 1
PQBP1	O60828	4	1	1	1	265	30.5	6.33	1.71	1	0	Medium	1	Putative uncharacterized protein encoded by LINC00269
PR38A	Q8NAV1	3	1	1	1	312	37.5	9.96	0	1	0	Medium	1	Pre-mRNA-splicing factor 38A
PR38B	Q5VTL8	1	1	1	1	546	64.4	10.54	0	1	0	Medium	1	Pre-mRNA-splicing factor 38B
PRA10	O60809	5	2	3	2	474	55.2	8.38	0	2	0	Medium	1	PRAME family member 10
PRAC2	D3DTV9	11	1	1	1	90	10.4	12	0	1	0	Medium	1	Putative protein PRCA2
PRAM2	O60811	3	2	5	2	474	54.8	7.83	0	2	0	Medium	1	PRAME family member 2
PRAM5	Q5TYX0	3	1	1	1	476	54.8	8.13	0	1	0	Medium	1	PRAME family member 5
PRAX	Q9BXM0	0	1	1	1	1461	154.8	7.5	0	1	0	Medium	1	Periaxin
PRDM2	Q13029	0	1	1	1	1718	188.8	7.31	1.88	1	0	Medium	1	PR domain zinc finger protein 2
PRDM5	Q9NQX1	3	2	2	1	630	73	8.81	0	2	0	Medium	1	PR domain zinc finger protein 5
PRDM9	Q9NQV7	1	1	1	1	894	103.3	9.19	0	1	0	Medium	1	Histone-lysine N-methyltransferase PRDM9
PRDX5	P30044	16	3	3	3	214	22.1	8.7	6.63	3	0	High	1	\Peroxiredoxin-5, mitochondrial\""
PRDX6	P30041	12	3	3	3	224	25	6.38	3.44	3	0	Medium	1	Peroxiredoxin-6
PREX1	Q8TCU6	1	1	1	1	1659	186.1	6.44	0	1	0	Medium	1	\Phosphatidylinositol 3,4,5-trisphosphate-dependent Rac exchanger 1 protein\""
PREX2	Q70Z35	0	1	2	1	1606	182.5	7.44	0	1	0	Medium	1	\Phosphatidylinositol 3,4,5-trisphosphate-dependent Rac exchanger 2 protein\""
PRLD2	Q8N945	4	1	1	1	189	21.9	8.75	0	1	0	Medium	1	PRELI domain-containing protein 2
PRLR	P16471	2	1	1	1	622	69.5	5.4	0	1	0	Medium	1	Prolactin receptor
PROM1	O43490	2	2	2	2	865	97.1	7.27	0	2	0	Medium	1	Prominin-1
PRORY	Q9H606	3	1	1	1	182	20	10.1	1.71	1	0	Medium	1	\Proline-rich protein, Y-linked\""
PRP17	O60508	2	1	1	1	579	65.5	7.06	0	1	0	Medium	1	Pre-mRNA-processing factor 17
PRP19	Q9UMS4	26	11	11	10	504	55.1	6.61	26.75	11	0	High	1	Pre-mRNA-processing factor 19
PRP31	Q8WWY3	7	4	4	4	499	55.4	5.78	8.96	4	0	High	1	U4/U6 small nuclear ribonucleoprotein Prp31
PRP4	O43172	16	7	7	6	522	58.4	7.42	13.96	7	0	High	1	U4/U6 small nuclear ribonucleoprotein Prp4
PRP4B	Q13523	2	3	3	3	1007	116.9	10.26	0	3	0	Medium	1	Serine/threonine-protein kinase PRP4 homolog
PRPF3	O43395	4	3	3	3	683	77.5	9.5	5.85	3	0	High	1	U4/U6 small nuclear ribonucleoprotein Prp3
PRPS2	P11908	7	2	2	2	318	34.7	6.61	3.95	2	0	High	1	Ribose-phosphate pyrophosphokinase 2
PRR9	Q5T870	8	1	1	1	116	12.9	4.97	0	1	0	Medium	1	Proline-rich protein 9
PRRP	P81277	14	1	1	1	87	9.6	11.66	0	1	0	Medium	1	Prolactin-releasing peptide
PRS10	P62333	5	2	2	1	389	44.1	7.49	3.4	2	0	High	1	26S protease regulatory subunit 10B
PRS23	O95084	4	2	2	1	383	43	9.42	0	2	0	Medium	1	Inactive serine protease 35
PRS6A	P17980	3	2	2	2	439	49.2	5.24	1.74	2	0	Medium	1	26S protease regulatory subunit 6A
PRVA	P20472	25	2	2	2	110	12.1	5.19	0	2	0	Medium	1	Parvalbumin alpha
PSA	P55786	5	4	4	4	919	103.2	5.72	7.08	4	0	High	1	Puromycin-sensitive aminopeptidase
PSA1	P25786	3	1	1	1	263	29.5	6.61	0	1	0	Medium	1	Proteasome subunit alpha type-1
PSA4	P25789	11	3	3	3	261	29.5	7.72	3.87	3	0	High	1	Proteasome subunit alpha type-4
PSA5	P28066	14	3	3	3	241	26.4	4.79	6.89	3	0	High	1	Proteasome subunit alpha type-5
PSA7	O14818	27	7	8	6	248	27.9	8.46	13.11	7	0	High	1	Proteasome subunit alpha type-7-like
PSB3	P49720	8	1	1	1	205	22.9	6.55	0	1	0	Medium	1	Proteasome subunit beta type-3
PSB6	P28072	3	1	4	1	239	25.3	4.92	0	1	0	Medium	1	Proteasome subunit beta type-6
PSD1	A5PKW4	1	1	1	1	1024	109.5	6.87	0	1	0	Medium	1	PH and SEC7 domain-containing protein 1
PSD12	O00232	8	4	6	4	456	52.9	7.65	0	4	0	Medium	1	26S proteasome non-ATPase regulatory subunit 12
PSD13	Q9UNM6	2	1	1	1	376	42.9	5.81	0	1	0	Medium	1	26S proteasome non-ATPase regulatory subunit 13
PSD2	Q9BQI7	1	1	1	1	771	84.6	5.19	0	1	0	Medium	1	PH and SEC7 domain-containing protein 2
PSDE	O00487	8	3	3	3	310	34.6	6.52	4.23	3	0	High	1	26S proteasome non-ATPase regulatory subunit 14
PSG9	Q00887	2	1	1	1	426	48.2	8.07	0	1	0	Medium	1	Pregnancy-specific beta-1-glycoprotein 2
PSIP1	O75475	9	4	4	4	530	60.1	9.13	4.69	4	0	High	1	PC4 and SFRS1-interacting protein
PSKH2	Q96QS6	5	2	2	2	385	43	9.63	0	2	0	Medium	1	Serine/threonine-protein kinase H2
PSMD3	O43242	29	14	15	14	534	60.9	8.44	31.67	14	0	High	1	26S proteasome non-ATPase regulatory subunit 3
PSMD7	P51665	4	1	2	1	324	37	6.77	2.9	1	0	High	1	26S proteasome non-ATPase regulatory subunit 7
PSMD9	O00233	5	1	1	1	223	24.7	6.95	0	1	0	Medium	1	26S proteasome non-ATPase regulatory subunit 9
PSME1	Q06323	31	7	7	7	249	28.7	6.02	12.61	7	0	High	1	Proteasome activator complex subunit 1
PSME2	Q9UL46	6	1	1	1	239	27.4	5.73	3.27	1	0	High	1	Proteasome activator complex subunit 2
PTBP3	O95758	12	7	8	3	552	59.7	9.04	11.5	7	0	High	1	Polypyrimidine tract-binding protein 3
PTCD3	Q96EY7	12	8	9	7	689	78.5	6.42	17.51	8	0	High	1	\Pentatricopeptide repeat domain-containing protein 3, mitochondrial\""
PTN1	P18031	6	3	3	3	435	49.9	6.27	4.03	3	0	High	1	Tyrosine-protein phosphatase non-receptor type 1
PTN11	Q06124	4	2	2	2	593	68	7.3	4.6	2	0	High	1	Tyrosine-protein phosphatase non-receptor type 11
PTN13	Q12923	1	3	3	2	2485	276.7	6.42	0	3	0	Medium	1	Tyrosine-protein phosphatase non-receptor type 13
PTPA	Q15257	3	1	1	1	358	40.6	5.94	2.05	1	0	High	1	Serine/threonine-protein phosphatase 2A activator
PTPRB	P23467	1	1	1	1	1997	224.2	7.61	0	1	0	Medium	1	Receptor-type tyrosine-protein phosphatase beta
PTPRK	Q15262	1	1	1	1	1439	162	5.9	2.02	1	0	Medium	1	Receptor-type tyrosine-protein phosphatase kappa
PTPRZ	P23471	0	1	1	1	2315	254.4	4.88	0	1	0	Medium	1	Receptor-type tyrosine-protein phosphatase zeta
PTSS2	Q9BVG9	2	1	1	1	487	56.2	6.25	0	1	0	Medium	1	Phosphatidylserine synthase 2
PTTG	P53801	11	2	2	2	180	20.3	8.79	0	2	0	Medium	1	Pituitary tumor-transforming gene 1 protein-interacting protein
PUF60	Q9UHX1	24	10	11	10	559	59.8	5.29	18.74	10	0	High	1	Poly(U)-binding-splicing factor PUF60
PUM1	Q14671	1	1	1	1	1186	126.4	6.84	0	1	0	Medium	1	Pumilio homolog 1
PUR2	P22102	4	3	4	3	1010	107.7	6.7	5.46	3	0	High	1	Trifunctional purine biosynthetic protein adenosine-3
PUR4	O15067	1	1	1	1	1338	144.6	5.76	0	1	0	Medium	1	Phosphoribosylformylglycinamidine synthase
PUR8	P30566	1	1	1	1	484	54.9	7.11	0	1	0	Medium	1	Adenylosuccinate lyase
PURA	Q00577	3	1	1	1	322	34.9	6.44	1.73	1	0	Medium	1	Transcriptional activator protein Pur-alpha
PURA2	P30520	3	1	1	1	456	50.1	6.55	0	1	0	Medium	1	Adenylosuccinate synthetase isozyme 2
PUS10	Q3MIT2	1	1	1	1	529	60.2	6.54	0	1	0	Medium	1	Putative tRNA pseudouridine synthase Pus10
PUS3	Q9BZE2	2	1	1	1	481	55.6	7.49	0	1	0	Medium	1	tRNA pseudouridine(38/39) synthase
PUS7	Q96PZ0	7	4	4	4	661	75	6.37	6.49	4	0	High	1	Pseudouridylate synthase 7 homolog
PVLEF	A0A1B0GWK0	17	1	1	1	134	15.3	6.02	0	1	0	Medium	1	.
PWP2	Q15269	1	1	1	1	919	102.4	6.15	0	1	0	Medium	1	Periodic tryptophan protein 2 homolog
PWP2B	Q6NUJ5	2	1	1	1	590	63.9	8.21	0	1	0	Medium	1	PWWP domain-containing protein 2B
PX11A	O75192	6	1	1	1	247	28.3	9.64	0	1	0	Medium	1	Peroxisomal membrane protein 11A
PXMP2	Q9NR77	6	1	1	1	195	22.2	10.58	0	1	0	Medium	1	Peroxisomal membrane protein 2
PYGL	P06737	4	4	5	1	847	97.1	7.17	6.53	4	0	Medium	1	\Glycogen phosphorylase, liver form\""
PYRG1	P17812	8	5	5	4	591	66.6	6.46	8.97	5	0	High	1	CTP synthase 2
QCR2	P22695	20	9	9	9	453	48.4	8.63	14.89	9	0	High	1	\Cytochrome b-c1 complex subunit 2, mitochondrial\""
QRIC2	Q9H0J4	1	2	2	1	1663	180.7	6.73	0	2	0	Medium	1	Glutamine-rich protein 2
R3HCL	Q7Z5L2	1	1	1	1	792	87.8	5.16	0	1	0	Medium	1	Coiled-coil domain-containing protein R3HCC1L
R3HD1	Q15032	3	3	3	2	1099	120.6	8.75	0	3	0	Medium	1	R3H domain-containing protein 1
R3HD2	Q9Y2K5	1	1	1	1	976	106.9	8.85	0	1	0	Medium	1	R3H domain-containing protein 2
R4RL1	Q86UN2	2	2	2	1	441	49	9	0	2	0	Medium	1	Reticulon-4 receptor-like 1
R51A2	Q09MP3	1	1	1	1	1159	133.8	7.34	0	1	0	Medium	1	RAD51-associated protein 2
RAB14	P61106	23	3	3	2	215	23.9	6.21	2.37	3	0	Medium	1	Ras-related protein Rab-14
RAB1A	P62820	19	4	4	3	205	22.7	6.21	10.05	4	0	High	1	Ras-related protein Rab-1A
RAB2A	P61019	7	1	1	1	212	23.5	6.54	2.56	1	0	High	1	Ras-related protein Rab-2A
RAB42	Q8N4Z0	5	1	1	1	218	24.1	7.06	0	1	0	Medium	1	Putative Ras-related protein Rab-42
RAB44	Q7Z6P3	1	1	1	1	1021	110.8	5.08	0	1	0	Medium	1	Ras-related protein Rab-44
RAB5C	P51148	5	1	1	1	216	23.5	8.41	2.73	1	0	High	1	Ras-related protein Rab-5C
RABL6	Q3YEC7	2	2	2	2	729	79.5	5.22	0	2	0	Medium	1	Rab-like protein 6
RAC1	P63000	23	4	4	4	192	21.4	8.5	10	4	0	High	1	Ras-related C3 botulinum toxin substrate 1
RAD17	O75943	2	1	1	1	681	77	7.06	0	1	0	Medium	1	Cell cycle checkpoint protein RAD17
RAD51	Q06609	6	1	1	1	339	36.9	5.6	0	1	0	Medium	1	DNA repair protein RAD51 homolog 1
RAD9B	Q6WBX8	2	1	1	1	426	47.8	6.87	0	1	0	Medium	1	Cell cycle checkpoint control protein RAD9B
RALA	P11233	3	1	1	1	206	23.6	7.11	0	1	0	Medium	1	Ras-related protein Ral-A
RAMP2	O60895	17	2	2	2	175	19.6	5.78	0	2	0	Medium	1	Receptor activity-modifying protein 2
RANB3	Q9H6Z4	4	1	1	1	567	60.2	4.78	0	1	0	Medium	1	Ran-binding protein 3
RANB9	Q96S59	2	1	2	1	729	77.8	6.79	0	1	0	Medium	1	Ran-binding protein 9
RANG	P43487	5	1	1	1	201	23.3	5.29	2.84	1	0	High	1	Ran-specific GTPase-activating protein
RAS4B	C9J798	2	1	2	1	803	90.4	7.74	0	1	0	Medium	1	Ras GTPase-activating protein 4B
RASA3	Q14644	1	1	3	1	834	95.6	7.15	0	1	0	Medium	1	Ras GTPase-activating protein 3
RASD1	Q9Y272	4	1	1	1	281	31.6	9	0	1	0	Medium	1	Dexamethasone-induced Ras-related protein 1
RASF1	Q9NS23	3	1	1	1	344	39.2	8.97	0	1	0	Medium	1	Ras association domain-containing protein 1
RAVR1	Q8IY67	2	1	1	1	606	63.8	8.48	0	1	0	Medium	1	Ribonucleoprotein PTB-binding 1
RB11A	P62491	21	4	4	4	216	24.4	6.57	9.45	4	0	High	1	Ras-related protein Rab-11A
RBBP6	Q7Z6E9	2	3	3	3	1792	201.4	9.64	0	3	0	Medium	1	E3 ubiquitin-protein ligase RBBP6
RBBP7	Q16576	5	2	2	1	425	47.8	5.05	4.22	2	0	Medium	1	Histone-binding protein RBBP4
RBG10	B7ZAP0	8	1	1	1	253	29	5.33	0	1	0	Medium	1	Rab GTPase-activating protein 1-like
RBGPR	Q9H2M9	1	1	1	1	1393	155.9	5.62	0	1	0	Medium	1	Rab3 GTPase-activating protein non-catalytic subunit
RBL1	P28749	3	3	3	3	1068	120.8	7.5	0	3	0	Medium	1	Retinoblastoma-like protein 1
RBM12	Q9NTZ6	2	2	2	2	932	97.3	8.63	0	2	0	Medium	1	RNA-binding protein 12
RBM20	Q5T481	0	1	1	1	1227	134.2	5.69	1.93	1	0	High	1	RNA-binding protein 20
RBM26	Q5T8P6	2	1	1	1	1007	113.5	9.16	0	1	0	Medium	1	RNA-binding protein 26
RBM4	Q9BWF3	8	1	1	1	364	40.3	7.08	3.45	1	0	High	1	RNA-binding protein 4
RBM47	A0AV96	6	4	4	4	593	64.1	7.68	4.5	4	0	High	1	RNA-binding protein 47
RBM48	Q5RL73	2	1	1	1	367	41.8	8.72	0	1	0	Medium	1	RNA-binding protein 48
RBP1	Q15311	4	1	1	1	655	76	5.88	0	1	0	Medium	1	RalA-binding protein 1
RBX1	P62877	10	2	2	2	108	12.3	6.96	0	2	0	Medium	1	RING-box protein 1
RC3H2	Q9HBD1	2	3	3	3	1191	131.6	6.89	1.89	3	0	Medium	1	Roquin-2
RCC1	P18754	16	5	5	5	421	44.9	7.52	7.97	5	0	High	1	Regulator of chromosome condensation
RCL1	Q9Y2P8	3	1	1	1	373	40.8	9.26	0	1	0	Medium	1	RNA 3'-terminal phosphate cyclase-like protein
RCN1	Q15293	8	2	2	2	331	38.9	5	3.32	2	0	High	1	Reticulocalbin-1
RCOR3	Q9P2K3	3	2	2	2	495	55.5	8.27	1.63	2	0	Medium	1	REST corepressor 3
RD23B	P54727	9	3	3	3	409	43.1	4.84	7.34	3	0	High	1	UV excision repair protein RAD23 homolog B
RD3	Q7Z3Z2	4	1	1	1	195	22.7	7.88	1.79	1	0	Medium	1	Protein RD3
RDH11	Q8TC12	4	1	1	1	318	35.4	8.82	2.52	1	0	High	1	Retinol dehydrogenase 12
RED	Q13123	3	2	2	2	557	65.6	6.64	1.99	2	0	High	1	Protein Red
RELCH	Q9P260	1	1	1	1	1216	134.5	5.45	0	1	0	Medium	1	LisH domain and HEAT repeat-containing protein KIAA1468
RER1	O15258	6	1	1	1	196	22.9	9.54	2.65	1	0	High	1	Protein RER1
RERE	Q9P2R6	1	1	1	1	1566	172.3	7.69	0	1	0	Medium	1	Arginine-glutamic acid dipeptide repeats protein
RET3	P10745	1	1	1	1	1247	135.3	5.11	0	1	0	Medium	1	Retinol-binding protein 3
RETST	Q6NUM9	5	2	2	2	610	66.8	8.28	0	2	0	Medium	1	\All-trans-retinol 13,14-reductase\""
REV3L	O60673	1	4	5	3	3130	352.6	8.47	0	4	0	Medium	1	DNA polymerase zeta catalytic subunit
REXO4	Q9GZR2	5	1	3	1	422	46.6	9.77	0	1	0	Medium	1	RNA exonuclease 4
REXO5	Q96IC2	1	1	7	1	774	86.8	8.32	1.68	1	0	Medium	1	Putative RNA exonuclease NEF-sp
RF1M	O75570	3	2	2	2	445	52.3	8.5	0	2	0	Medium	1	\Peptide chain release factor 1, mitochondrial\""
RFA1	P27694	16	9	10	9	616	68.1	7.21	16.95	9	0	High	1	Replication protein A 70 kDa DNA-binding subunit
RFIP1	Q6WKZ4	3	3	3	3	1283	137.1	5.43	0	3	0	Medium	1	Rab11 family-interacting protein 1
RFIP5	Q9BXF6	2	1	1	1	653	70.4	9.23	0	1	0	Medium	1	Rab11 family-interacting protein 5
RFOX1	Q9NWB1	3	1	1	1	397	42.8	6.86	0	1	0	Medium	1	RNA binding protein fox-1 homolog 1
RFX4	Q33E94	1	1	1	1	735	83.3	6.86	0	1	0	Medium	1	Transcription factor RFX4
RGAP1	Q9H0H5	4	3	3	3	632	71	8.88	0	3	0	Medium	1	Rac GTPase-activating protein 1
RGRF1	Q13972	3	2	2	2	1273	145.1	7.44	1.84	2	0	Medium	1	Ras-specific guanine nucleotide-releasing factor 1
RGRF2	O14827	4	5	6	4	1237	140.7	7.53	0	5	0	Medium	1	Ras-specific guanine nucleotide-releasing factor 2
RGS16	O15492	5	1	2	1	202	22.7	6.64	0	1	0	Medium	1	Regulator of G-protein signaling 16
RGSL	A5PLK6	1	1	1	1	1076	125.6	9.01	0	1	0	Medium	1	Regulator of G-protein signaling protein-like
RHAG	Q02094	5	1	1	1	409	44.2	6.84	0	1	0	Medium	1	Ammonium transporter Rh type A
RHG26	Q9UNA1	3	2	2	2	814	92.2	6.64	0	2	0	Medium	1	Rho GTPase-activating protein 26
RHG39	Q9C0H5	1	1	1	1	1083	121.2	7.5	0	1	0	Medium	1	Rho GTPase-activating protein 39
RHOU	Q7L0Q8	2	1	1	1	258	28.2	8.06	0	1	0	Medium	1	Rho-related GTP-binding protein RhoU
RHOV	Q96L33	5	1	4	1	236	26.2	8.05	0	1	0	Medium	1	Rho-related GTP-binding protein RhoV
RHXF1	Q8NHV9	7	1	1	1	184	20.5	6.11	0	1	0	Medium	1	Rhox homeobox family member 1
RIBC2	Q9H4K1	2	1	2	1	382	45.4	9.58	1.72	1	0	Medium	1	RIB43A-like with coiled-coils protein 2
RIC1	Q4ADV7	1	1	1	1	1423	159.2	6.38	0	1	0	Medium	1	RAB6A-GEF complex partner protein 1
RIC8A	Q9NPQ8	2	1	1	1	531	59.7	5.33	0	1	0	Medium	1	Synembryn-A
RIC8B	Q9NVN3	2	2	2	2	520	58.8	5.73	1.86	2	0	Medium	1	Synembryn-B
RIGI	O95786	4	3	3	3	925	106.5	6.4	1.64	3	0	Medium	1	Probable ATP-dependent RNA helicase DDX58
RILP	Q96NA2	3	2	2	1	401	44.2	5.59	0	2	0	Medium	1	Rab-interacting lysosomal protein
RIOX2	Q8IUF8	3	1	1	1	465	52.8	6.7	0	1	0	Medium	1	Bifunctional lysine-specific demethylase and histidyl-hydroxylase MINA
RIPK4	P57078	1	1	1	1	832	91.6	7.17	0	1	0	Medium	1	Receptor-interacting serine/threonine-protein kinase 4
RIPR2	Q9Y4F9	1	1	1	1	1068	118.4	5.41	0	1	0	Medium	1	Protein FAM65B
RIPR3	Q96MK2	1	1	1	1	946	105.2	7.43	0	1	0	Medium	1	Protein FAM65C
RL10A	P62906	22	5	5	5	217	24.8	9.94	5.16	5	0	High	1	60S ribosomal protein L10a
RL11	P62913	8	1	2	1	178	20.2	9.6	2.55	1	0	High	1	60S ribosomal protein L11
RL12	P30050	22	3	3	3	165	17.8	9.42	3.41	3	0	High	1	60S ribosomal protein L12
RL13A	P40429	6	2	2	2	203	23.6	10.93	2.15	2	0	High	1	60S ribosomal protein L13a
RL14	P50914	19	4	5	4	215	23.4	10.93	11.41	4	0	High	1	60S ribosomal protein L14
RL15	P61313	16	4	4	4	204	24.1	11.62	7.3	4	0	High	1	60S ribosomal protein L15
RL1D1	O76021	10	5	5	5	490	54.9	10.13	6.61	5	0	High	1	Ribosomal L1 domain-containing protein 1
RL21	P46778	9	1	1	1	160	18.6	10.49	0	1	0	Medium	1	60S ribosomal protein L21
RL23	P62829	20	2	2	2	140	14.9	10.51	4.04	2	0	High	1	60S ribosomal protein L23
RL24	P83731	25	3	3	3	157	17.8	11.25	5.37	3	0	High	1	60S ribosomal protein L24
RL27A	P46776	16	2	2	2	148	16.6	11	5.96	2	0	High	1	60S ribosomal protein L27a
RL36	Q9Y3U8	20	2	2	2	105	12.2	11.59	5.38	2	0	High	1	60S ribosomal protein L36
RL36L	Q969Q0	23	3	3	3	106	12.5	10.65	6.38	3	0	High	1	60S ribosomal protein L36a
RL3R1	Q9NSD7	3	1	1	1	469	51.1	8.79	0	1	0	Medium	1	Relaxin-3 receptor 1
RL7L	Q6DKI1	3	1	1	1	255	29.7	10.52	0	1	0	Medium	1	60S ribosomal protein L7-like 1
RL9	P32969	4	1	1	1	192	21.9	9.95	1.77	1	0	Medium	1	60S ribosomal protein L9
RLIG1	Q8N999	3	1	1	1	325	37.5	7.06	0	1	0	Medium	1	Uncharacterized protein C12orf29
RM02	Q5T653	6	1	1	1	305	33.3	11.3	0	1	0	Medium	1	\39S ribosomal protein L2, mitochondrial\""
RMD2	Q96LZ7	3	2	2	2	410	47.4	6.54	0	2	0	Medium	1	Regulator of microtubule dynamics protein 2
RMD3	Q96TC7	2	1	1	1	470	52.1	5.1	2.14	1	0	High	1	Regulator of microtubule dynamics protein 3
RMXL2	O75526	7	3	3	1	392	42.8	10.32	6.49	3	0	Medium	1	\RNA-binding motif protein, X-linked-like-2\""
RN146	Q9NTX7	6	1	1	1	359	38.9	5.33	0	1	0	Medium	1	E3 ubiquitin-protein ligase RNF146
RN168	Q8IYW5	3	1	1	1	571	65	7.96	0	1	0	Medium	1	E3 ubiquitin-protein ligase RNF168
RN182	Q8N6D2	9	1	1	1	247	27.4	6.18	0	1	0	Medium	1	E3 ubiquitin-protein ligase RNF182
RNF14	Q9UBS8	3	2	2	2	474	53.8	4.75	0	2	0	Medium	1	E3 ubiquitin-protein ligase RNF14
RNF32	Q9H0A6	2	1	1	1	362	41.5	8.88	0	1	0	Medium	1	RING finger protein 32
RNH2C	Q8TDP1	8	1	1	1	164	17.8	5.03	0	1	0	Medium	1	Ribonuclease H2 subunit C
RNZ2	Q9BQ52	5	3	3	3	826	92.2	7.9	3.42	3	0	Medium	1	Zinc phosphodiesterase ELAC protein 2
RO60	P10155	3	2	2	2	538	60.6	8.03	4.66	2	0	High	1	60 kDa SS-A/Ro ribonucleoprotein
ROBO1	Q9Y6N7	1	1	1	1	1651	180.8	6.04	0	1	0	Medium	1	Roundabout homolog 1
ROP1A	Q9HAT0	9	1	1	1	212	23.9	5.66	0	1	0	Medium	1	Ropporin-1-like protein
RP9	Q8TA86	8	1	1	1	221	26.1	9.79	0	1	0	Medium	1	Retinitis pigmentosa 9 protein
RPA1	O95602	1	2	2	2	1720	194.7	7.03	0	2	0	Medium	1	DNA-directed RNA polymerase I subunit RPA1
RPAB4	P53803	12	1	1	1	58	7	9.06	0	1	0	Medium	1	\DNA-directed RNA polymerases I, II, and III subunit RPABC4\""
RPAP2	Q8IXW5	3	1	1	1	612	69.5	7.78	0	1	0	Medium	1	Putative RNA polymerase II subunit B1 CTD phosphatase RPAP2
RPAP3	Q9H6T3	7	3	3	3	665	75.7	6.84	3.96	3	0	High	1	RNA polymerase II-associated protein 3
RPB2	P30876	3	3	3	3	1174	133.8	6.87	1.87	3	0	Medium	1	DNA-directed RNA polymerase II subunit RPB2
RPB4	O15514	5	1	1	1	142	16.3	4.79	0	1	0	Medium	1	DNA-directed RNA polymerase II subunit RPB4
RPGF4	Q8WZA2	1	1	1	1	1011	115.4	6.84	0	1	0	Medium	1	Rap guanine nucleotide exchange factor 4
RPGP2	Q684P5	2	1	1	1	730	80	6.67	0	1	0	Medium	1	Rap1 GTPase-activating protein 2
RPGR	Q92834	1	1	1	1	1020	113.3	4.86	0	1	0	Medium	1	X-linked retinitis pigmentosa GTPase regulator
RPN2	P04844	30	15	19	15	631	69.2	5.69	57.06	15	0	High	1	Dolichyl-diphosphooligosaccharide--protein glycosyltransferase subunit 2
RPR1A	Q96P16	14	4	4	4	312	35.7	7.55	0	4	0	Medium	1	Regulation of nuclear pre-mRNA domain-containing protein 1A
RPR1B	Q9NQG5	5	1	1	1	326	36.9	5.97	2.54	1	0	High	1	Regulation of nuclear pre-mRNA domain-containing protein 1B
RRN3	Q9NYV6	2	1	1	1	651	74.1	5.63	0	1	0	Medium	1	RNA polymerase I-specific transcription initiation factor RRN3
RRP15	Q9Y3B9	4	1	1	1	282	31.5	5.52	0	1	0	Medium	1	RRP15-like protein
RRP36	Q96EU6	3	1	1	1	259	29.8	10.17	0	1	0	Medium	1	Ribosomal RNA processing protein 36 homolog
RS11	P62280	21	4	4	3	158	18.4	10.3	6.26	4	0	High	1	40S ribosomal protein S11
RS12	P25398	11	1	1	1	132	14.5	7.21	2.15	1	0	Medium	1	40S ribosomal protein S12
RS15	P62841	5	2	2	2	145	17	10.39	0	2	0	Medium	1	40S ribosomal protein S15
RS21	P63220	18	1	1	1	83	9.1	8.5	0	1	0	Medium	1	40S ribosomal protein S21
RS23	P62266	8	1	1	1	143	15.8	10.49	3.53	1	0	High	1	40S ribosomal protein S23
RS26	P62854	6	1	1	1	115	13	11	2.4	1	0	High	1	40S ribosomal protein S26
RS28	P62857	13	1	2	1	69	7.8	10.7	0	1	0	Medium	1	40S ribosomal protein S28
RS30	P62861	8	1	1	1	133	14.4	10.17	2.12	1	0	High	1	Ubiquitin-like protein FUBI
RS5	P46782	27	4	4	4	204	22.9	9.72	10.66	4	0	High	1	40S ribosomal protein S5
RSAD2	Q8WXG1	2	1	1	1	361	42.1	8.22	0	1	0	Medium	1	Radical S-adenosyl methionine domain-containing protein 2
RSH4A	Q5TD94	1	1	1	1	716	80.7	4.44	0	1	0	Medium	1	Radial spoke head protein 4 homolog A
RSMB	P14678	13	3	3	3	240	24.6	11.19	6.35	3	0	High	1	Small nuclear ribonucleoprotein-associated protein N
RSP14	Q9UHP6	5	1	1	1	348	38.6	6.9	0	1	0	Medium	1	Radial spoke head 14 homolog
RSRC1	Q96IZ7	2	1	1	1	334	38.7	11.08	0	1	0	Medium	1	Serine/Arginine-related protein 53
RT02	Q9Y399	5	2	2	2	296	33.2	9.26	0	2	0	Medium	1	\28S ribosomal protein S2, mitochondrial\""
RT10	P82664	6	1	1	1	201	23	8	2.31	1	0	High	1	\28S ribosomal protein S10, mitochondrial\""
RT28	Q9Y2Q9	5	1	1	1	187	20.8	9.1	1.86	1	0	Medium	1	\28S ribosomal protein S28, mitochondrial\""
RT31	Q92665	4	2	2	2	395	45.3	9.29	0	2	0	Medium	1	\28S ribosomal protein S31, mitochondrial\""
RT34	P82930	3	1	1	1	218	25.6	9.98	1.92	1	0	High	1	\28S ribosomal protein S34, mitochondrial\""
RT35	P82673	4	1	1	1	323	36.8	8.24	0	1	0	Medium	1	\28S ribosomal protein S35, mitochondrial\""
RTCA	O00442	3	1	1	1	366	39.3	7.85	0	1	0	Medium	1	RNA 3'-terminal phosphate cyclase
RTF1	Q92541	2	1	1	1	710	80.3	8.15	2.22	1	0	High	1	RNA polymerase-associated protein RTF1 homolog
RTN3	O95197	1	1	1	1	1032	112.5	4.96	2.63	1	0	High	1	Reticulon-3
RTN4	Q9NQC3	2	3	5	3	1192	129.9	4.5	7.99	3	0	High	1	Reticulon-4
RTP1	P59025	2	1	1	1	263	30.9	7.81	0	1	0	Medium	1	Receptor-transporting protein 1
RTRAF	Q9Y224	16	3	3	3	244	28.1	6.65	5.08	3	0	High	1	UPF0568 protein C14orf166 homolog
RU1C	P09234	6	1	1	1	159	17.4	9.67	2	1	0	High	1	U1 small nuclear ribonucleoprotein C
RU2B	P08579	8	2	2	1	225	25.5	9.72	3.67	2	0	Medium	1	U2 small nuclear ribonucleoprotein B''
RUFY1	Q96T51	5	3	3	3	708	79.8	5.74	5.25	3	0	Medium	1	RUN and FYVE domain-containing protein 1
RUFY4	Q6ZNE9	4	3	3	3	571	64.3	6.83	0	3	0	Medium	1	RUN and FYVE domain-containing protein 4
RUN3B	Q96NL0	3	1	1	1	473	52.8	5.59	0	1	0	Medium	1	RUN domain-containing protein 3B
RYR1	P21817	0	2	2	2	5038	564.8	5.3	0	2	0	Medium	1	Ryanodine receptor 1
S10AE	Q9HCY8	25	2	2	2	104	11.7	5.24	3.11	2	0	High	1	Protein S100-A14
S13A3	Q8WWT9	1	1	1	1	602	66.8	8.32	0	1	0	Medium	1	Solute carrier family 13 member 3
S20A1	Q8WUM9	1	1	1	1	679	73.7	7.08	0	1	0	Medium	1	Sodium-dependent phosphate transporter 1
S22AI	Q96BI1	3	1	1	1	424	44.8	9.57	0	1	0	Medium	1	Solute carrier family 22 member 18
S22AO	Q8N4F4	3	2	2	2	552	61.7	8.12	1.86	2	0	Medium	1	Solute carrier family 22 member 9
S2512	O75746	12	8	8	6	678	74.7	8.38	12.8	8	0	High	1	Calcium-binding mitochondrial carrier protein Aralar1
S2513	Q9UJS0	7	5	5	3	675	74.1	8.62	10.68	5	0	High	1	Calcium-binding mitochondrial carrier protein Aralar2
S2553	Q5H9E4	5	1	2	1	307	34.5	9.85	0	1	0	Medium	1	Solute carrier family 25 member 53
S26A3	P40879	1	1	1	1	764	84.5	8.69	0	1	0	Medium	1	Chloride anion exchanger
S26A5	P58743	3	2	2	2	744	81.2	6.29	0	2	0	Medium	1	Prestin
S26A6	Q9BXS9	2	1	1	1	759	82.9	8.37	0	1	0	Medium	1	Prestin
S27A2	O14975	15	8	8	8	620	70.3	8.51	13.43	8	0	High	1	Very long-chain acyl-CoA synthetase
S27A4	Q6P1M0	5	3	3	3	643	72	8.47	0	3	0	Medium	1	Long-chain fatty acid transport protein 4
S29A1	Q99808	3	2	2	2	456	50.2	8.29	4.14	2	0	High	1	Equilibrative nucleoside transporter 1
S30BP	Q9UHR5	5	1	1	1	308	33.9	4.84	0	1	0	Medium	1	SAP30-binding protein
S31A3	Q5VYP0	1	1	2	1	1347	148.6	8.7	0	1	0	Medium	1	Spermatogenesis-associated protein 31A3
S31D1	Q6ZQQ2	1	1	9	1	1576	175.5	8.85	0	1	0	Medium	1	Spermatogenesis-associated protein 31D1
S35C2	Q9NQQ7	4	1	1	1	365	40.4	8.18	0	1	0	Medium	1	Solute carrier family 35 member C2
S38A2	Q96QD8	5	2	2	2	506	56	8	1.88	2	0	Medium	1	Sodium-coupled neutral amino acid transporter 2
S39A2	Q9NP94	3	1	1	1	309	32.7	6.29	0	1	0	Medium	1	Zinc transporter ZIP2
S39AA	Q9ULF5	1	1	1	1	831	94.1	6.76	0	1	0	Medium	1	Zinc transporter ZIP10
S39AE	Q15043	5	2	2	2	492	54.2	5.33	5.74	2	0	High	1	Zinc transporter ZIP14
S6A11	P48066	1	1	1	1	632	70.6	6.89	0	1	0	Medium	1	Sodium- and chloride-dependent GABA transporter 3
S6A17	Q9H1V8	2	2	2	1	727	80.9	5.99	0	2	0	Medium	1	Sodium-dependent neutral amino acid transporter SLC6A17
S6A20	Q9NP91	2	1	1	1	592	65.9	6.65	0	1	0	Medium	1	Sodium- and chloride-dependent transporter XTRP3
SAC1	Q9NTJ5	5	3	3	3	587	66.9	7.12	4.79	3	0	High	1	Phosphatidylinositide phosphatase SAC1
SACS	Q9NZJ4	1	7	7	5	4579	520.8	7.05	1.93	7	0	High	1	Sacsin
SAE1	Q9UBE0	6	2	2	2	346	38.4	5.3	0	2	0	Medium	1	SUMO-activating enzyme subunit 1
SAE2	Q9UBT2	7	4	4	4	640	71.2	5.29	6.21	4	0	High	1	SUMO-activating enzyme subunit 2
SALL4	Q9UJQ4	1	1	1	1	1053	112.2	7.47	0	1	0	Medium	1	Sal-like protein 4
SAM50	Q9Y512	12	6	6	6	469	51.9	6.9	4.07	6	0	High	1	Sorting and assembly machinery component 50 homolog
SAMD3	Q8N6K7	4	2	3	1	520	61.2	7.09	0	2	0	Medium	1	Sterile alpha motif domain-containing protein 3
SAMD9	Q5K651	1	2	2	2	1589	184.2	7.83	0	2	0	Medium	1	Sterile alpha motif domain-containing protein 9
SAMH1	Q9Y3Z3	5	3	3	3	626	72.2	7.14	6.54	3	0	High	1	Deoxynucleoside triphosphate triphosphohydrolase SAMHD1
SAMN1	Q9NSI8	3	1	1	1	373	41.7	5.43	0	1	0	Medium	1	SAM domain-containing protein SAMSN-1
SANBR	Q6NSI8	1	1	1	1	718	82	6.9	0	1	0	Medium	1	Uncharacterized protein KIAA1841
SAP18	O00422	5	1	1	1	153	17.6	9.35	1.92	1	0	High	1	Histone deacetylase complex subunit SAP18
SAR1A	Q9NR31	12	2	2	2	198	22.4	6.68	3.73	2	0	High	1	GTP-binding protein SAR1a
SARG	Q9BW04	1	1	1	1	601	63.9	8.62	0	1	0	Medium	1	Specifically androgen-regulated gene protein
SARNP	P82979	23	4	4	4	210	23.7	6.42	10.88	4	0	High	1	DnaJ homolog subfamily C member 14
SAS6	Q6UVJ0	2	1	1	1	657	74.4	7.55	0	1	0	Medium	1	Spindle assembly abnormal protein 6 homolog
SASH1	O94885	3	4	4	4	1247	136.6	6.09	0	4	0	Medium	1	SAM and SH3 domain-containing protein 1
SATB1	Q01826	1	1	1	1	763	85.9	6.54	0	1	0	Medium	1	DNA-binding protein SATB1
SATB2	Q9UPW6	1	1	3	1	733	82.5	6.9	0	1	0	Medium	1	DNA-binding protein SATB2
SBDS	Q9Y3A5	4	1	1	1	250	28.7	8.75	1.86	1	0	Medium	1	Ribosome maturation protein SBDS
SC22B	O75396	7	1	1	1	215	24.7	8.51	0	1	0	Medium	1	Vesicle-trafficking protein SEC22b
SC23A	Q15436	6	5	5	4	765	86.1	7.08	6.56	5	0	High	1	Protein transport protein Sec23B
SC24A	O95486	1	1	1	1	1093	119.7	7.66	1.79	1	0	Medium	1	Protein transport protein Sec24A
SC24C	P53992	5	5	5	4	1094	118.2	7.06	6.1	5	0	High	1	Protein transport protein Sec24C
SC5A4	Q9NY91	1	1	1	1	659	72.4	6.15	0	1	0	Medium	1	Low affinity sodium-glucose cotransporter
SC5AB	Q8WWX8	1	1	1	1	675	74	6.77	0	1	0	Medium	1	Sodium/myo-inositol cotransporter 2
SC61B	P60468	10	1	1	1	96	10	11.56	1.77	1	0	Medium	1	Protein transport protein Sec61 subunit beta
SC6A5	Q9Y345	3	1	1	1	797	87.4	7.52	0	1	0	Medium	1	Sodium- and chloride-dependent glycine transporter 2
SCAF8	Q9UPN6	2	2	2	2	1271	140.4	8.29	2.8	2	0	High	1	Protein SCAF8
SCAM3	O14828	9	2	2	2	347	38.3	7.64	2.52	2	0	High	1	Secretory carrier-associated membrane protein 3
SCG1	P05060	1	1	1	1	677	78.2	5.07	0	1	0	Medium	1	Secretogranin-1
SCIN	Q9Y6U3	4	2	2	1	715	80.4	5.71	0	2	0	Medium	1	Adseverin
SCMC1	Q6NUK1	4	2	2	2	477	53.3	6.33	0	2	0	Medium	1	Calcium-binding mitochondrial carrier protein SCaMC-1
SCML1	Q9UN30	4	1	1	1	329	37.4	6.89	0	1	0	Medium	1	Sex comb on midleg-like protein 1
SCN4B	Q8IWT1	9	1	1	1	228	25	7.36	0	1	0	Medium	1	Sodium channel subunit beta-4
SCNBA	Q9UI33	2	3	4	2	1791	204.8	7.99	1.66	3	0	Medium	1	Sodium channel protein type 11 subunit alpha
SCOT1	P55809	8	2	2	2	520	56.1	7.46	3.73	2	0	High	1	\Succinyl-CoA:3-ketoacid coenzyme A transferase 1, mitochondrial\""
SCP2	P22307	1	1	1	1	547	59	6.89	1.85	1	0	Medium	1	Non-specific lipid-transfer protein
SCPDL	Q8NBX0	3	1	1	1	429	47.1	9.14	0	1	0	Medium	1	Saccharopine dehydrogenase-like oxidoreductase
SCRB1	Q8WTV0	5	3	3	3	552	60.8	8.24	5.03	3	0	High	1	Scavenger receptor class B member 1
SCRB2	Q14108	14	8	8	7	478	54.3	5.14	18.95	8	0	High	1	Lysosome membrane protein 2
SCRIB	Q14160	1	2	2	2	1630	174.8	5.07	2.41	2	0	High	1	Protein scribble homolog
SCYL1	Q96KG9	2	1	1	1	808	89.6	6.3	2.19	1	0	High	1	N-terminal kinase-like protein
SCYL2	Q6P3W7	3	2	2	2	929	103.6	8.22	3.84	2	0	Medium	1	SCY1-like protein 2
SDCG8	Q86SQ7	4	3	3	3	713	82.6	5.81	0	3	0	Medium	1	Serologically defined colon cancer antigen 8
SDF2	Q99470	7	1	1	1	211	23	7.33	0	1	0	Medium	1	Stromal cell-derived factor 2
SEC20	Q12981	9	1	1	1	228	26.1	8.95	0	1	0	Medium	1	Vesicle transport protein SEC20
SEC63	Q9UGP8	2	2	2	2	760	87.9	5.31	2.07	2	0	High	1	Translocation protein SEC63 homolog
SEGN	O76038	9	3	4	2	276	32	5.41	0	3	0	Medium	1	Secretagogin
SEM3C	Q99985	2	1	1	1	751	85.2	8.69	0	1	0	Medium	1	Semaphorin-3C
SEM5B	Q9P283	2	2	2	2	1151	125.8	7.65	0	2	0	Medium	1	Semaphorin-5B
SERB	P78330	6	2	2	1	225	25	5.69	0	2	0	Medium	1	Phosphoserine phosphatase
SET	Q01105	18	5	5	5	290	33.5	4.32	10.57	5	0	High	1	Protein SETSIP
SETB1	Q15047	2	2	2	2	1291	143.1	6.02	2.16	2	0	Medium	1	Histone-lysine N-methyltransferase SETDB1
SETD3	Q86TU7	2	1	1	1	594	67.2	5.96	2.15	1	0	High	1	Histone-lysine N-methyltransferase setd3
SF3A2	Q15428	13	5	5	5	464	49.2	9.64	15.02	5	0	High	1	Splicing factor 3A subunit 2
SF3B4	Q15427	3	1	1	1	424	44.4	8.56	1.69	1	0	Medium	1	Splicing factor 3B subunit 4
SFRP1	Q8N474	7	2	2	2	314	35.4	8.85	0	2	0	Medium	1	Secreted frizzled-related protein 1
SG1C2	P0DMR2	26	1	1	1	95	10.5	4.81	0	1	0	Medium	1	Secretoglobin family 1C member 2
SGK3	Q96BR1	3	2	2	1	496	57.1	6.93	0	2	0	Medium	1	Serine/threonine-protein kinase Sgk3
SGMR1	Q99720	3	1	1	1	223	25.1	5.96	0	1	0	Medium	1	Sigma non-opioid intracellular receptor 1
SH22A	Q9NP31	3	1	1	1	389	42.9	7.42	0	1	0	Medium	1	SH2 domain-containing protein 2A
SH3G3	Q99963	5	1	1	1	347	39.3	5.38	0	1	0	Medium	1	Endophilin-A3
SH3K1	Q96B97	2	1	1	1	665	73.1	6.62	0	1	0	Medium	1	SH3 domain-containing kinase-binding protein 1
[truncated: 560 more rows]
